# Supplementary material for: CRISPR–Cas9-mediated construction of a cotton CDPK mutant library for identification of insect-resistance genes
Source: PubMed Central journal article supplement — Plant Commun. 2024 Aug 12;5(11):101047. doi: 10.1016/j.xplc.2024.101047 (PMC11589327; doi:10.1016/j.xplc.2024.101047), 2024-08-12
Supplement: mmc1.pdf [file mmc1.pdf]

**Plant Communications, Volume 5**

**Supplemental information**

**CRISPR–Cas9-mediated construction of a cotton *CDPK* mutant library  
for identification of insect-resistance genes**

**Fuqiu Wang, Sijia Liang, Guanying Wang, Tianyu Hu, Chunyang Fu, Qiongqiong Wang, Zhongping Xu, Yibo Fan, Lianlian Che, Ling Min, Bo Li, Lu Long, Wei Gao, Xianlong Zhang, and Shuangxia Jin**

Figure S1

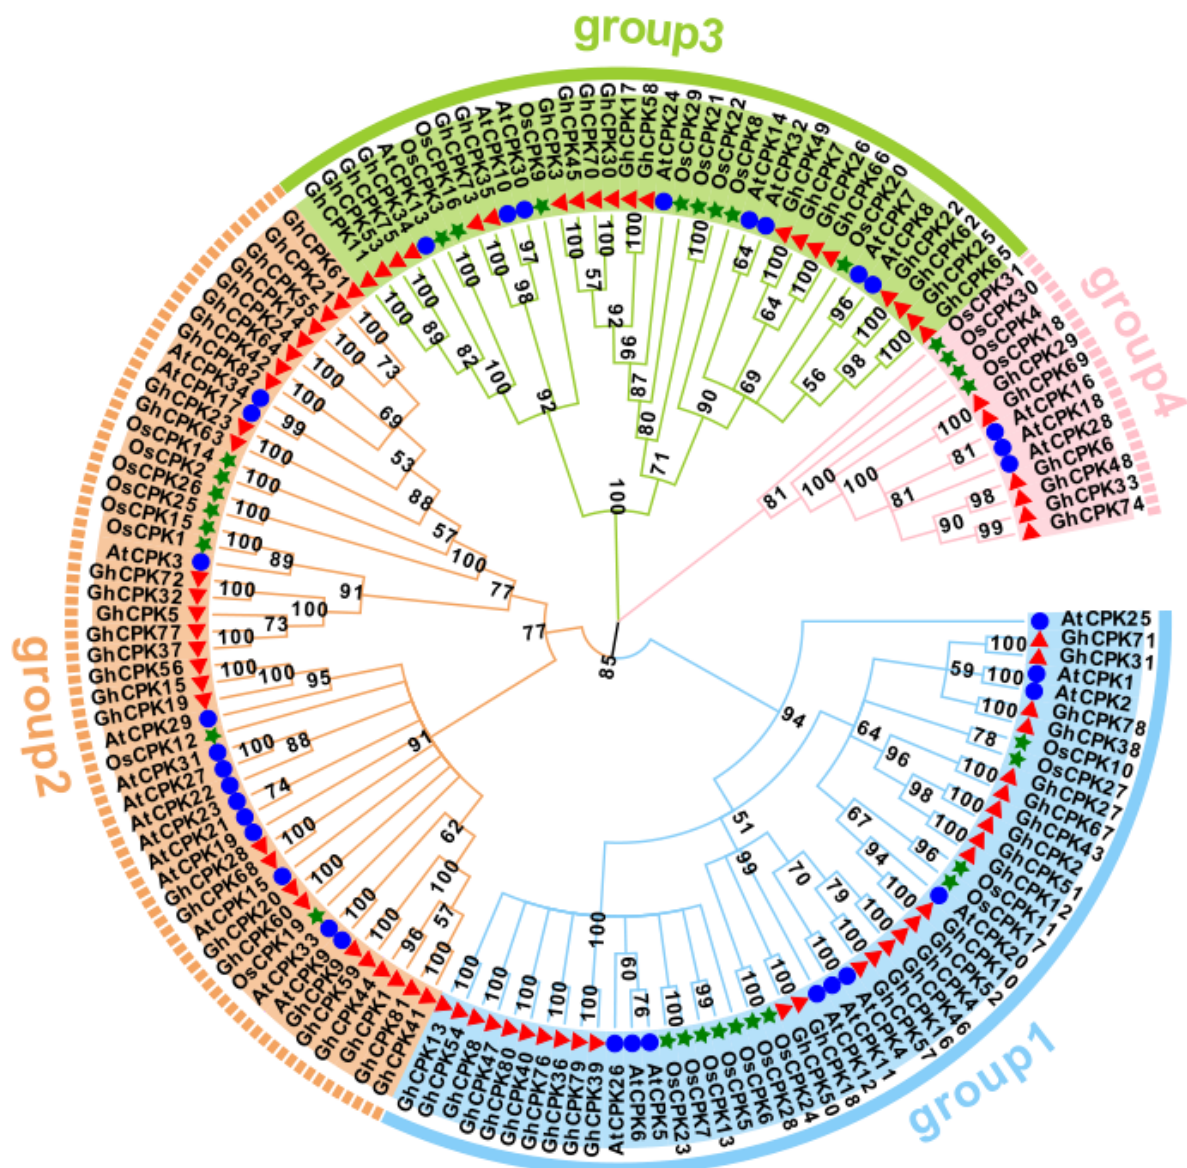

Figure S1 Phylogenetic analysis of CDPK gene families in *G. hirsutum*, *A. thaliana* and *O. sativa*. Groups 1, 2, 3, and 4 indicate different gene clusters. Different colors of symbols represent different species. Red triangles represent *G. hirsutum*, blue circles represent *A. thaliana* and green pentagrams represent *O. sativa*.

**Figure S2**

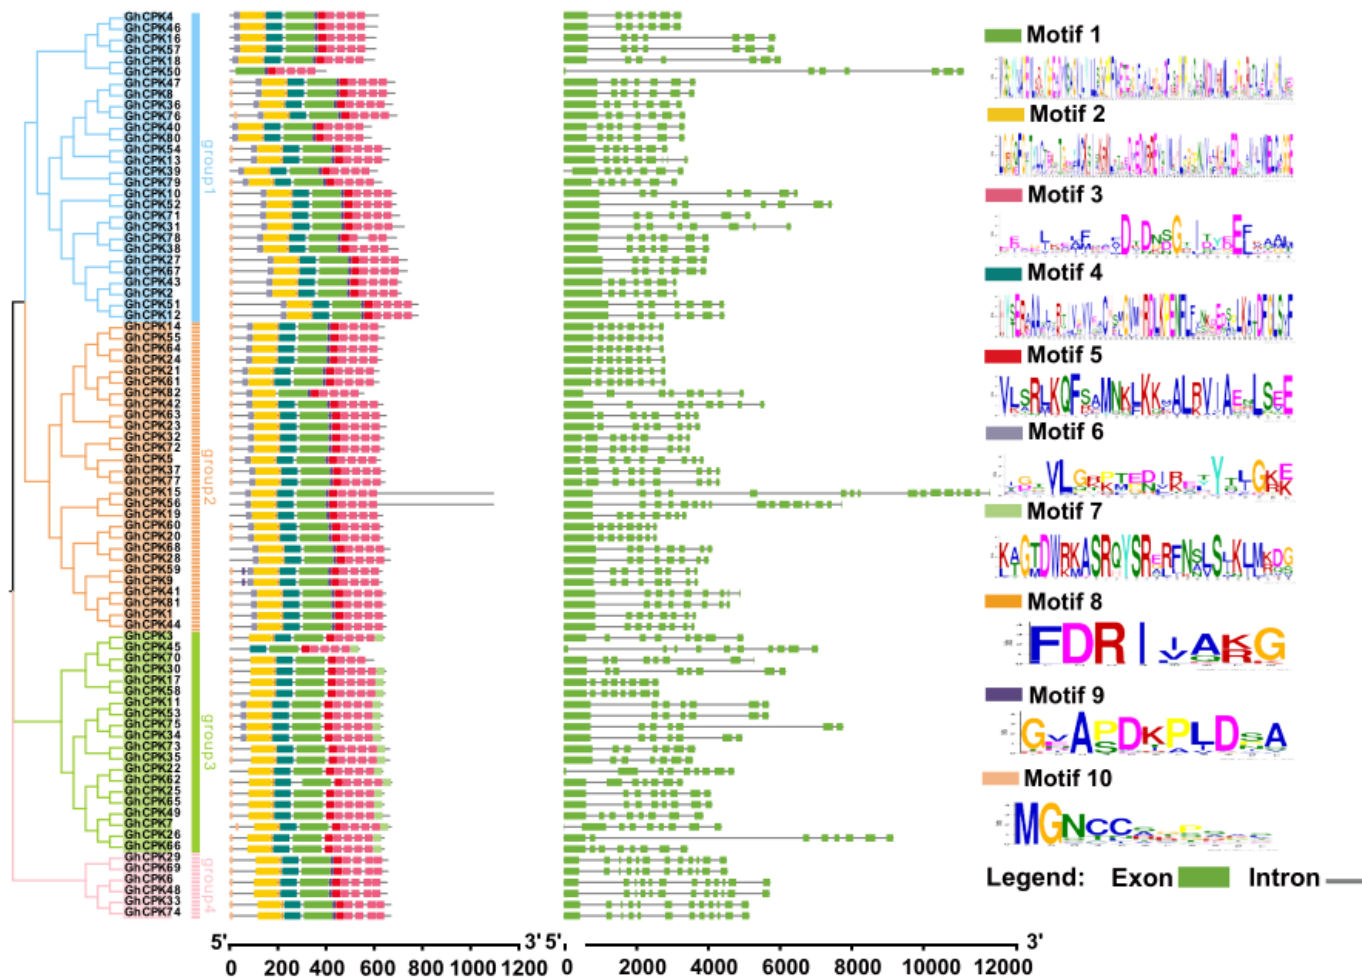

**Figure S2 Phylogenetic tree, conserved protein motifs and gene structures of *GhCPKs* gene family.** From left to right, it shows the phylogenetic tree, conserved protein motifs and gene structure of the *G. hirsutum* CDPK gene family. In the phylogenetic tree, different colors represent different subgroups. Within the protein conserved motifs, a total of 10 conserved motifs have been identified, distributed in different colored boxes. On the far right are the sequence logos of these protein motifs. In the exon-intron structure diagram, the green box represents exons and the black line represents introns.



# Figure S4

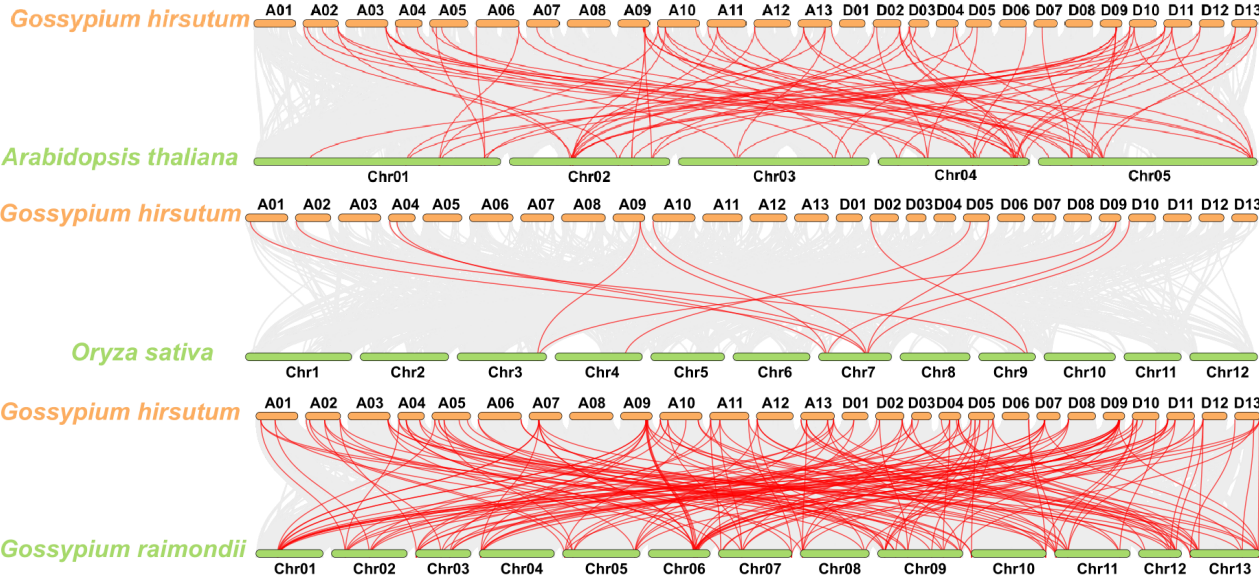

Figure S4 Collinearity analysis of CDPK genes between *G. hirsutum* with *A. thaliana*, *O. sativa* and *G. raimondii*. Grey lines indicate collinear blocks within the *G. hirsutum* genome and other plant genomes, and the red curve indicates CDPK genes with collinearity.



# Figure S5

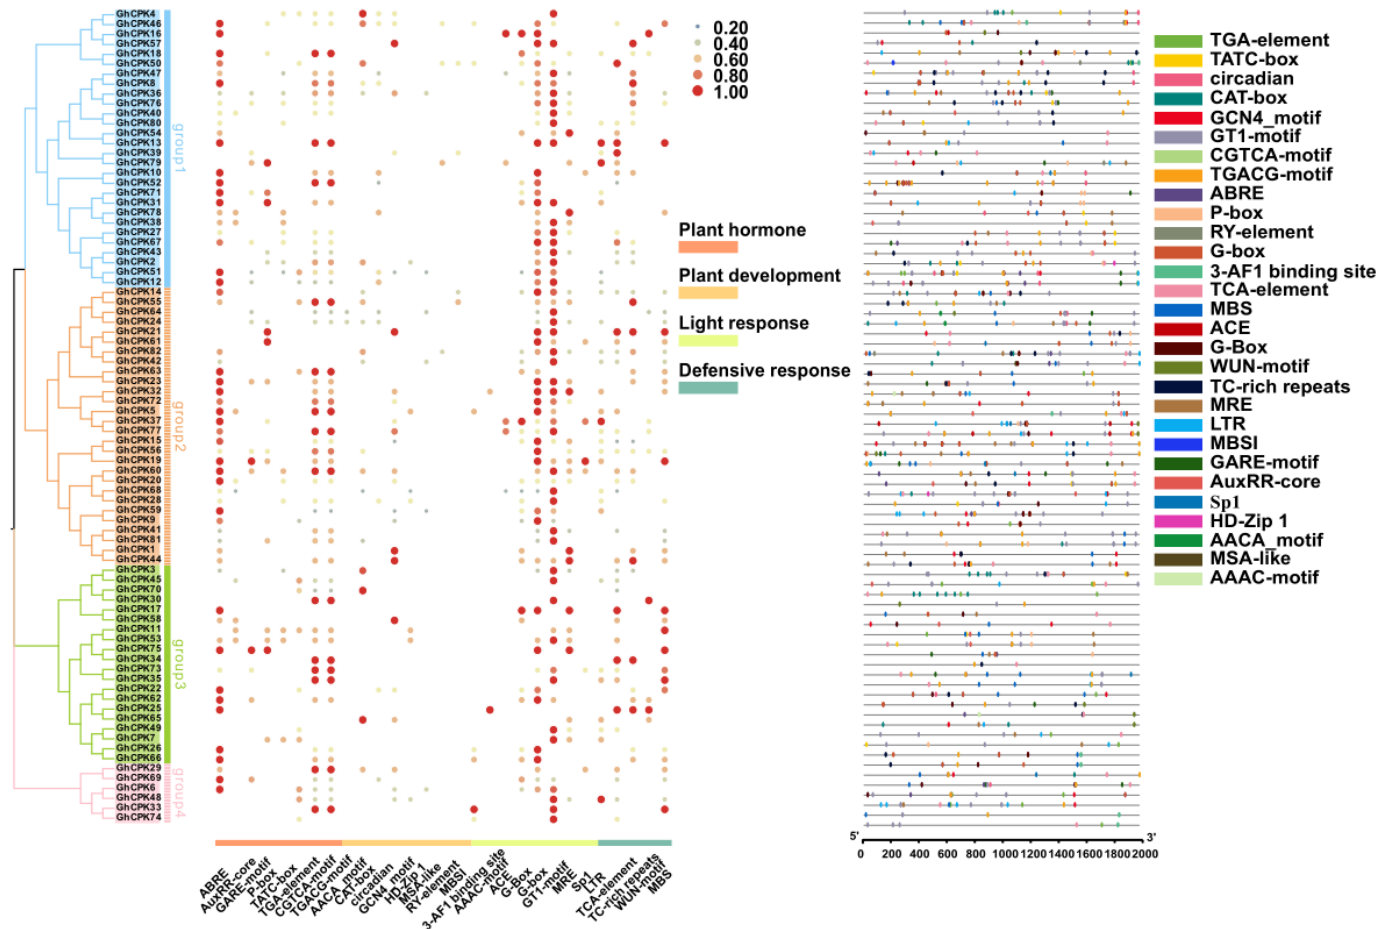

**Figure S5 Cis-acting elements in the promoter regions of *GhCPKs*.** On the left is the phylogenetic tree of the *GhCPKs* gene family. In the middle is a heat map of the number of all cis-acting elements. The larger and redder the circle, the greater the quantity represented. The diagram on the right shows the positional distribution of promoter cis-acting elements of the *GhCPK* genes. The black line indicates the promoter length of the *GhCPK* genes. The different colored boxes on the right represent cis-acting elements with different functions.

**Figure S6**

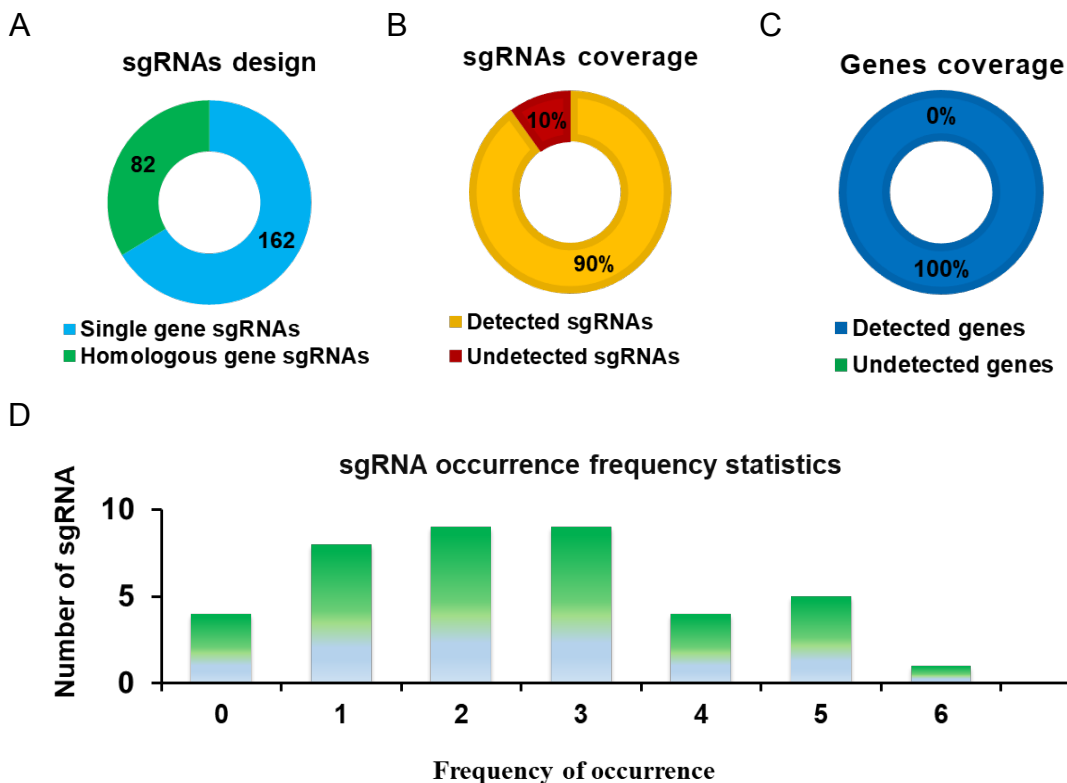

**Figure S6** The number of sgRNAs in the *GhCPKs* gene family mutant library and the preliminary experimental results of mixed pool 1. (A) The quantity of different types of sgRNAs. Blue represents the quantity of sgRNAs targeting individual *GhCPKs*, green represents the quantity of sgRNAs targeting homologous *GhCPKs*. (B) Coverage of sgRNA in the preliminary experiment. Yellow color represents detected sgRNAs, red color represents undetected sgRNAs. (C) Coverage of gene in the preliminary experiment. Deep blue color represents detected genes, green color represents undetected genes. (D) Frequency statistics of sgRNA. The X-axis represents the frequency of occurrence of target sgRNAs, and the Y-axis represents the number of sgRNAs.

# Figure S7

A

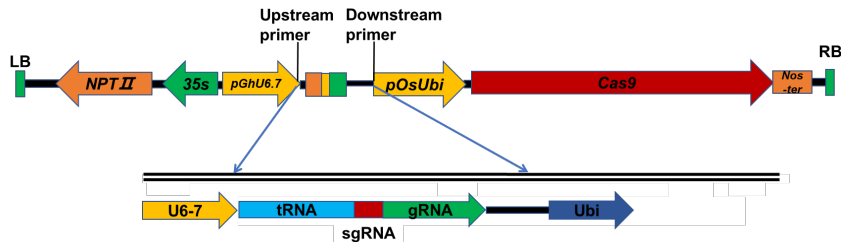

B

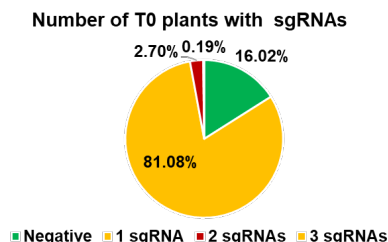

C

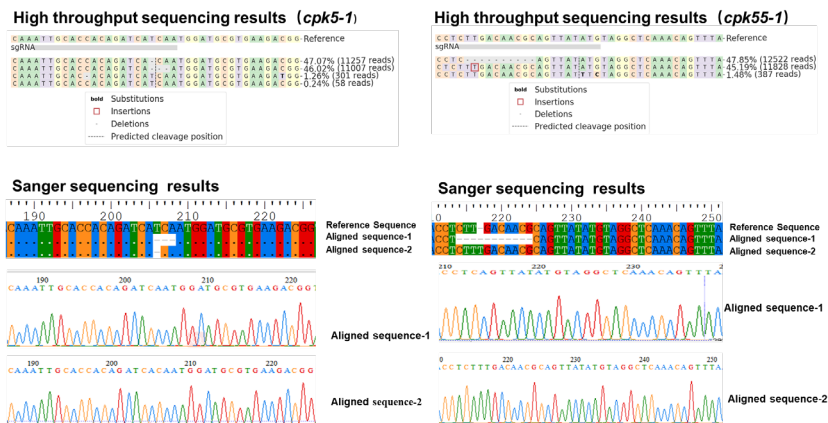

D

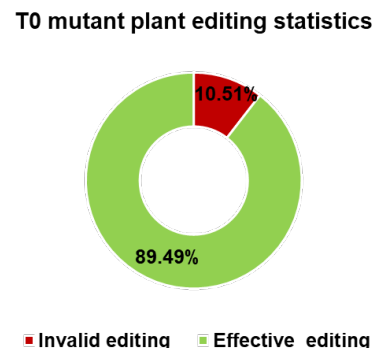

E

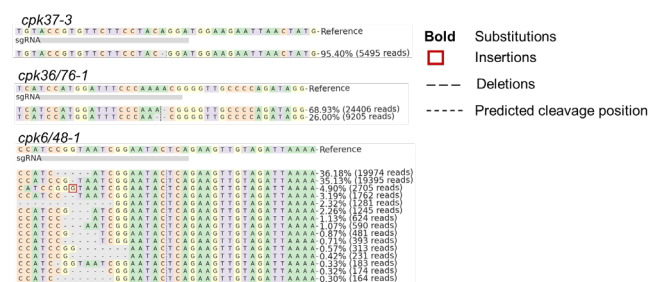

F

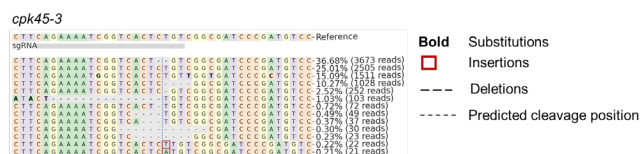

**Figure S7 Molecular detection of T0 generation *GhCPKs* mutant library plants.** (A) PCR amplification sgRNA vector sequence diagram. The different colored boxes represent different vector components. (B) Statistical analysis of the number of sgRNAs present in the T0 generation *GhCPKs* mutant library plants. Yellow means only one sgRNA, red means two sgRNA, and green means three sgRNA. (C) Comparison of high-throughput sequencing and Sanger sequencing results for gene editing plants. (D) Editing statistics of T0 generation *GhCPKs* mutant library plants. Green means that gene editing is detected, red means that gene editing is not detected. (E) Examples of one, two and multiple types of editing. Bold represents base substitutions, red boxes represent base insertions, dashes represent base deletions, and dashed lines represent predicted cleavage positions. (F) The most common editing types in the mutant library. Bold represents base substitutions, red boxes represent base insertions, dashes represent base deletions, and dashed lines represent predicted cleavage positions.



# Figure S8

A

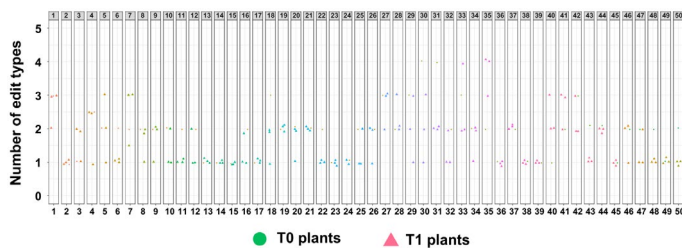

B

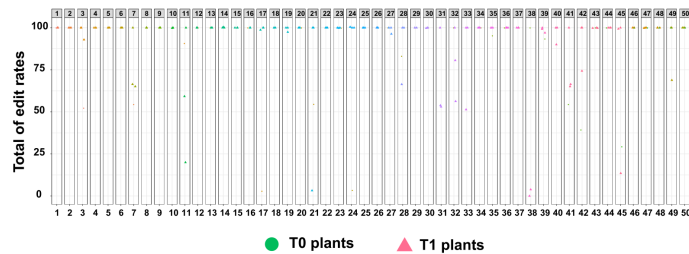

C

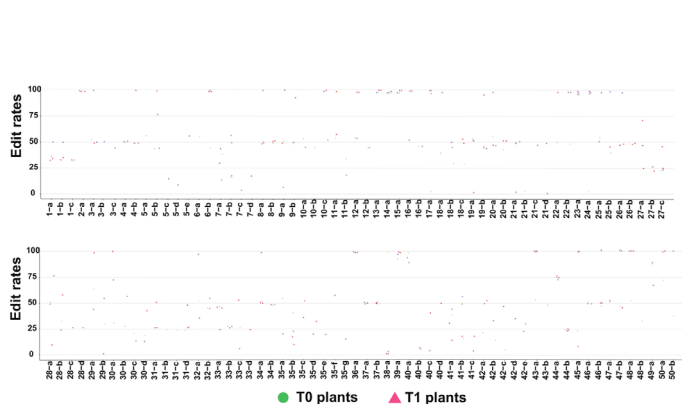

D

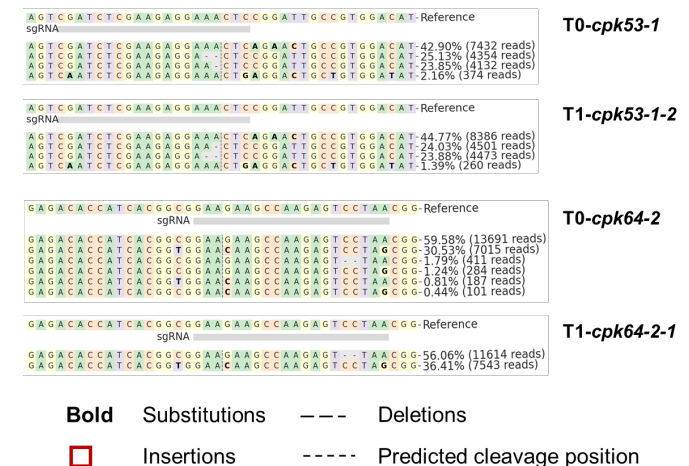

**Figure S8 Genetic analysis of 50 *GhCPKs* gene-edited plants and their 150 progeny.** (A) Editing type statistics of 50 *GhCPKs* gene-edited plants and their 150 progeny. The circle represents T0 generation plants, the triangle represents T1 generation plants. (B) Editing efficiency statistics of 50 *GhCPKs* gene-edited plants and their 150 progeny. (C) Statistical analysis of editing efficiency for each editing type in 50 *GhCPKs* gene-edited plants and their 150 progeny. (D) Examples of genetic states in different progenitor and progeny gene-edited plants. Bold represents base substitutions, red boxes represent base insertions, dashes represent base deletions, and dashed lines represent predicted cleavage positions.

# Figure S9

A

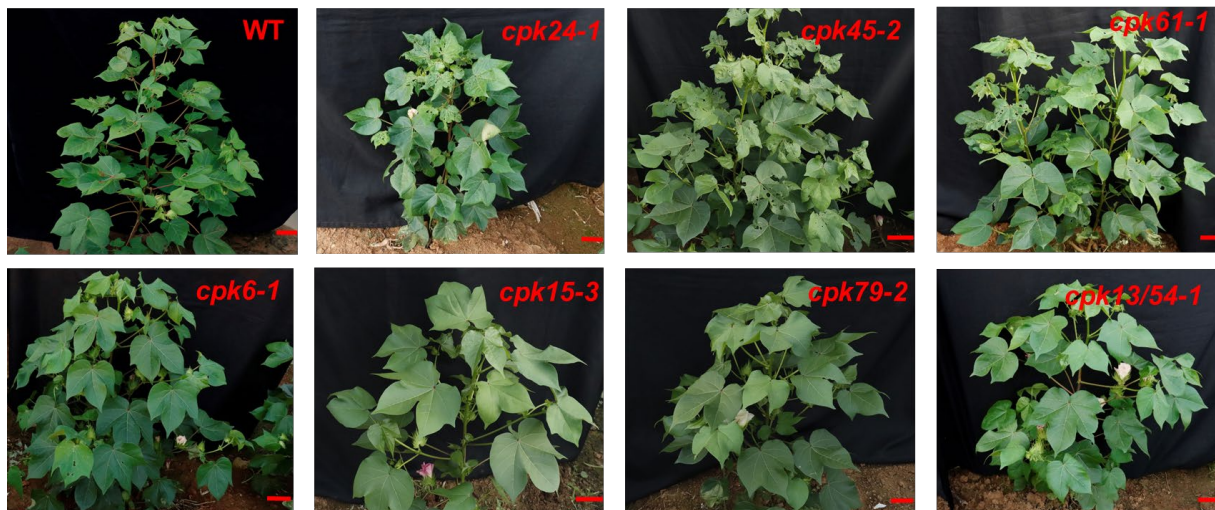

B

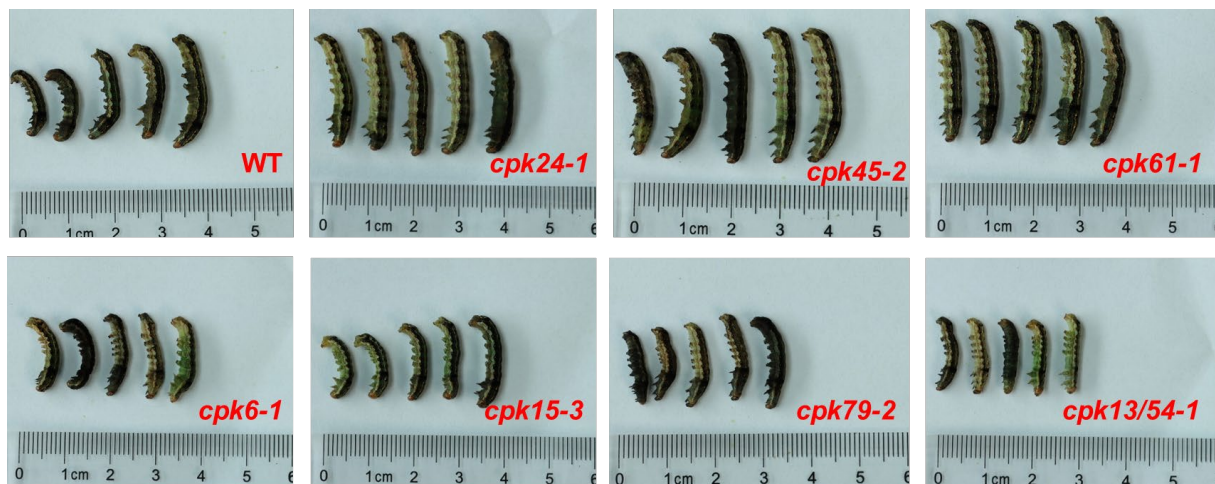

**Figure S9** Example of insect resistance phenotypic screening in *GhCPKs* mutant library plants. (A) Field insect resistance phenotype of corresponding numbered plants. (B) Phenotype of *S. litura* larvae feeding on the corresponding numbered plants five days later.

# Figure S10

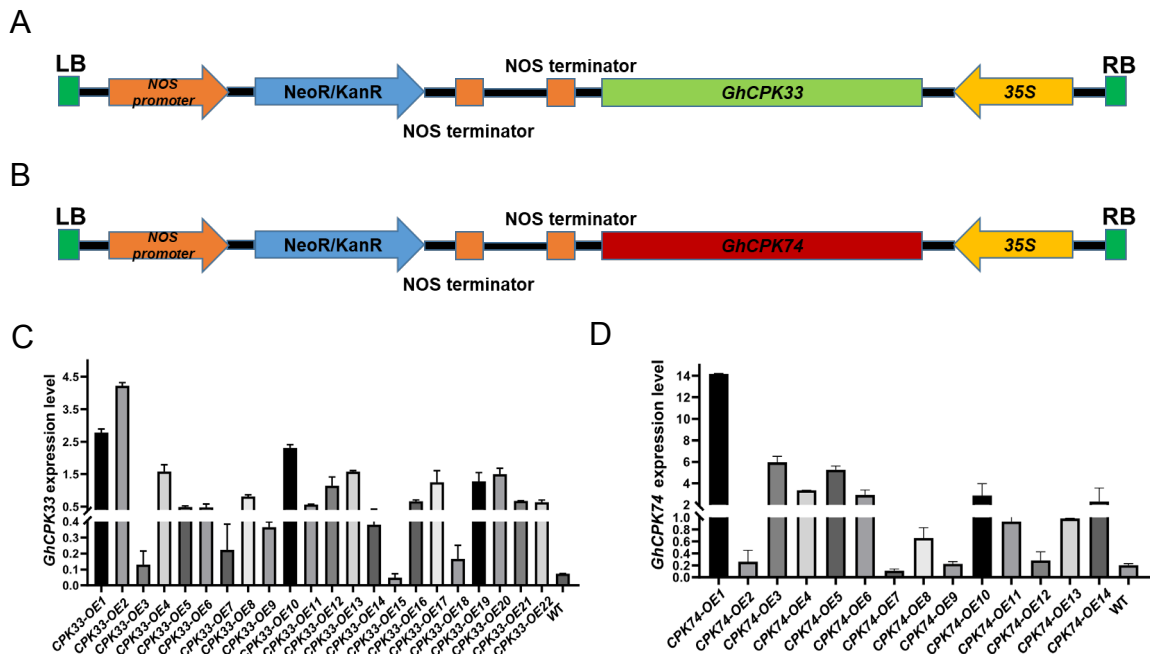

**Figure S10 Construction of expression vectors and detection of expression levels for *GhCPK33* and *GhCPK74* overexpression materials.** (A) Construction of *GhCPK33* overexpression vectors. (B) Construction of *GhCPK74* overexpression vectors. Different color boxes represent different carrier elements. (C) Detection of *GhCPK33* expression levels in T0-generation *CPK33-OE* overexpression materials. (D) Detection of *GhCPK74* expression levels in T0-generation *CPK74-OE* overexpression materials. The expression of *GhUB7* was used as internal control. Means  $\pm$  SE (n = 3).

# Figure S11

A

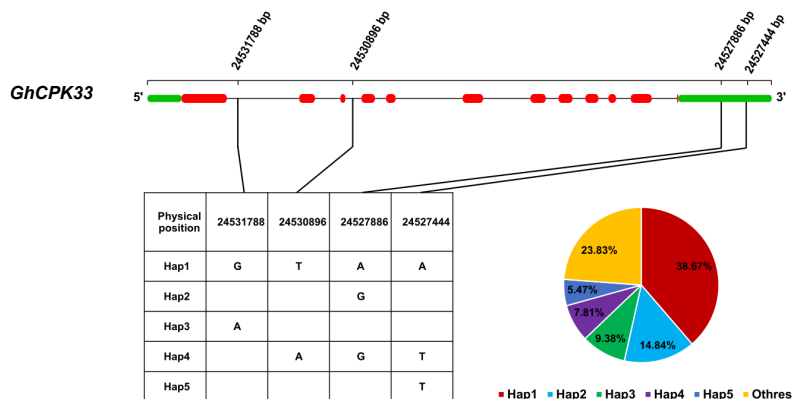

B

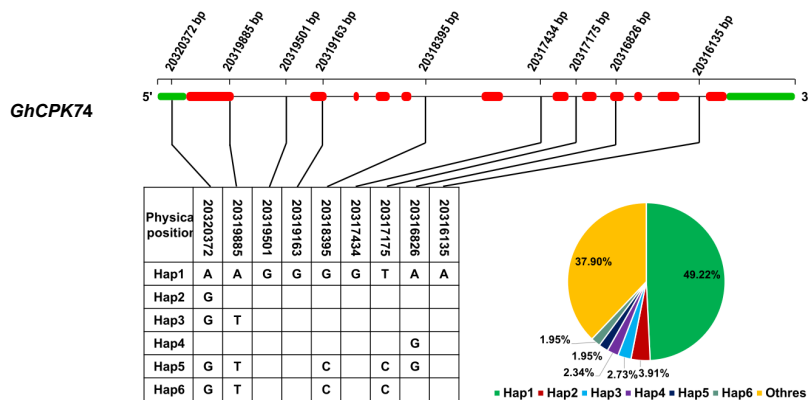

C

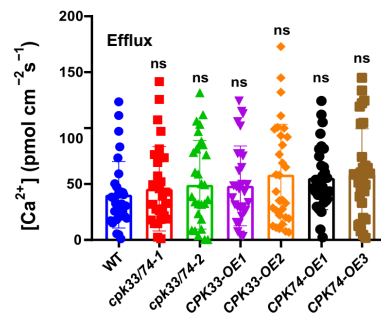

D

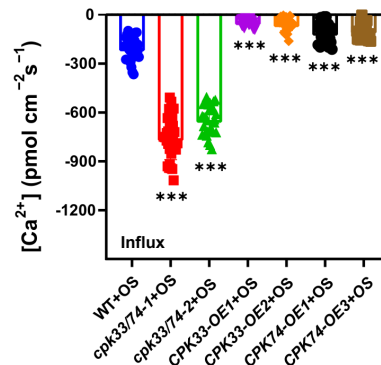

**Figure S11 Haplotype analysis of *GhCPK33* and *GhCPK74* and the detection of average  $\text{Ca}^{2+}$  flow rate in leaf mesophyll cells.**

(A) The gene *GhCPK33* structure and single-nucleotide polymorphisms (SNPs) variants contained in the Ghlandraces population showed the five haplotypes with highest proportions, and the blank boxes were the same nucleotides as the reference genome (Hap1). The pie charts show the proportion of the five haplotypes. (B) The gene *GhCPK74* structure and single-nucleotide polymorphisms (SNPs) variants contained in the Ghlandraces population showed the six haplotypes with highest proportions, and the blank boxes were the same nucleotides as the reference genome (Hap1). The pie charts show the proportion of the six haplotypes. (C) In the untreated state, the average  $\text{Ca}^{2+}$  flow rate in leaf mesophyll cells of *cpk33/74*, *CPK33-OE*, *CPK74-OE* and WT over a 5-minute period. (D) After treatment with the OS of *S. litura*, the average  $\text{Ca}^{2+}$  flow rate in leaf mesophyll cells of *cpk33/74*, *CPK33-OE*, *CPK74-OE* and WT over a 5-minute period.

# Figure S12

A

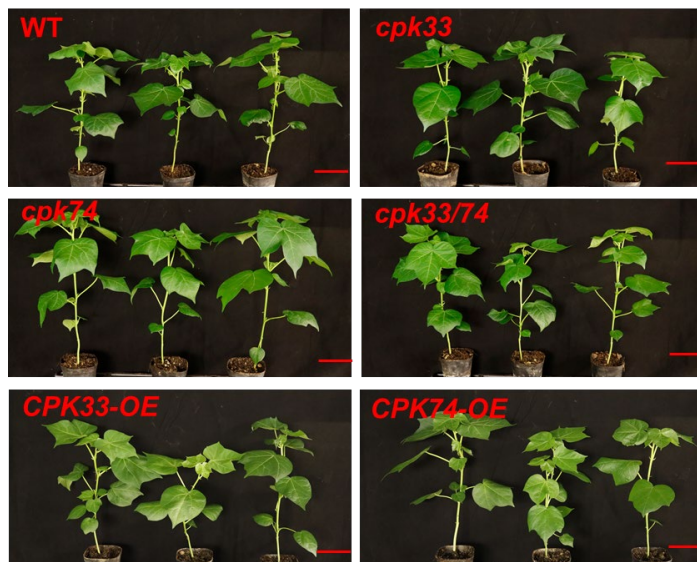

B

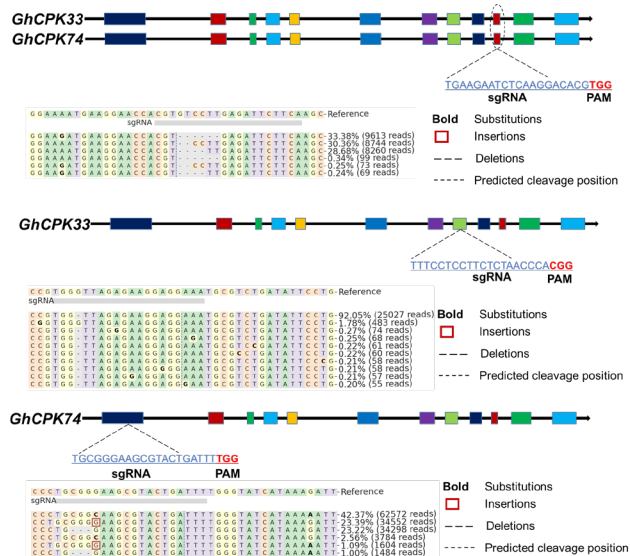

C

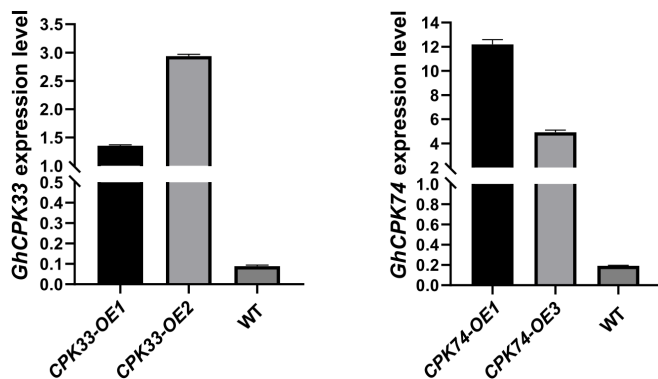

**Figure S12 Cultivation, gene editing and expression level detection of T2 generation *cpk33/74*, *cpk33*, *cpk74*, *CPK33-OE*, *CPK74-OE* and WT plants. (A) Cultivation of T2 generation *cpk33/74*, *cpk33*, *cpk74*, *CPK33-OE*, *CPK74-OE* and WT plants. (B) Detection of editing in T2 generation *cpk33*, *cpk74* and *cpk74/33* plants. (C) Detection of *GhCPK33* and *GhCPK74* expression levels in T2 generation *CPK33-OE* and *CPK74-OE* overexpression materials. The expression of *GhUB7* was used as internal control. Means  $\pm$  SE (n = 3).**



## Figure S13

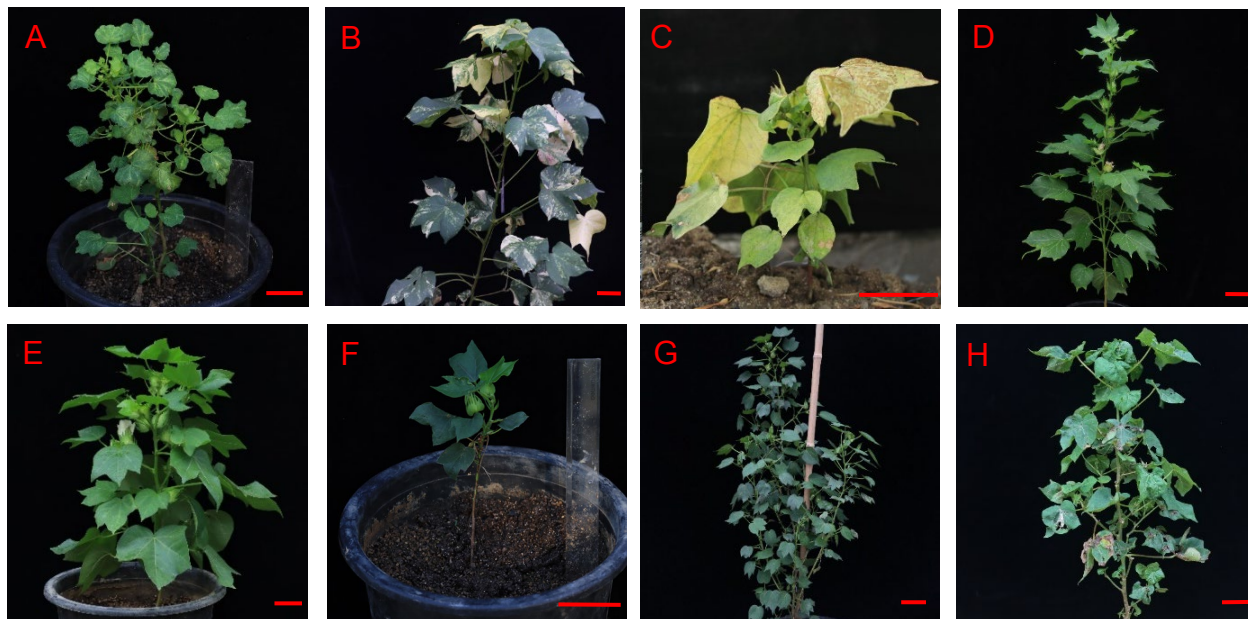

**Figure S13 Identification of unique phenotypes in the T0 generation *GhCPKs* mutant library plants.** (A) The leaf is round. (B) The leaves showed chimeric yellowing. (C) The plant type is dwarfed and the leaves turn yellow. (D) The fruit branches become shorter. (E) Dwarfing and compact plants. (F) Plant dwarfing and early maturing. (G) The leaves become smaller. (H) Necrotic spots appeared on the leaves. The red line represents 5 cm.

Figure S14

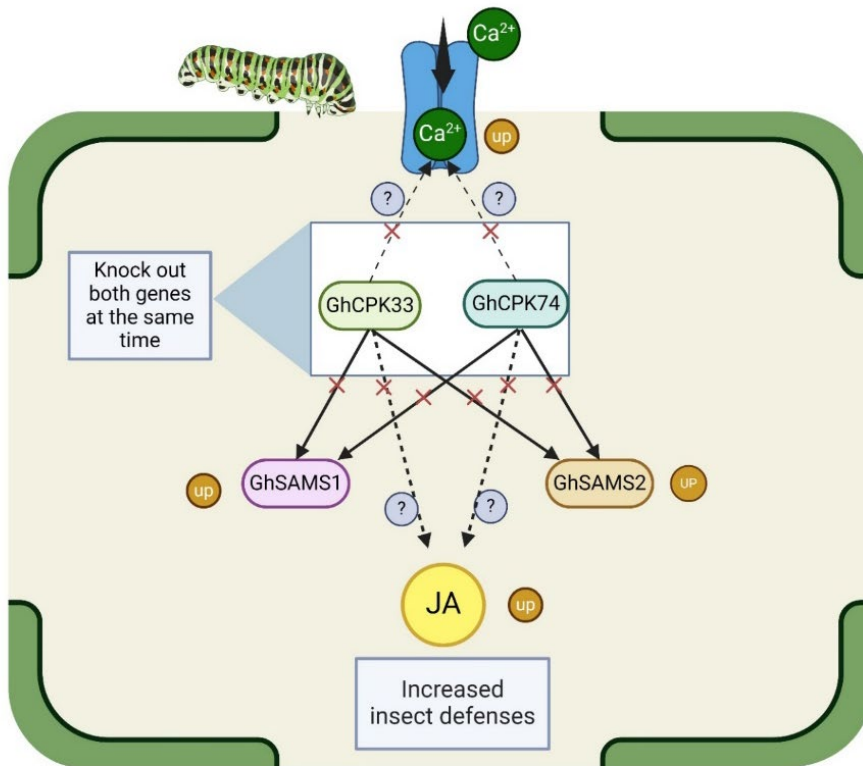

**Figure S14 Models of *GhCPK33* and *GhCPK74* regulating pest defense in upland cotton.** Under the induction of OS from the *S. litura*, simultaneously knocking out *GhCPK33* and *GhCPK74* can accelerate the influx of  $Ca^{2+}$  in cotton leaf mesophyll cells, enhance the synthesis of JA, and increase the expression of *GhSAMS1* and *GhSAMS2*, resulting in an increased defense capability of cotton against herbivorous insects.



|         |             |                   |                  |          |          |   |     |         |      |            |   |   |   |     |     |   |   |
|---------|-------------|-------------------|------------------|----------|----------|---|-----|---------|------|------------|---|---|---|-----|-----|---|---|
| GhCPK66 | Gh_D09G1163 | Ghir_D09G012710.1 | D09              | 38278169 | 38281037 | - | 531 | 60227.3 | 6.76 | MGNCCVTS   | N | Y | 4 | III | M   | 0 | N |
| GhCPK67 | Gh_D09G1249 | Ghir_D09G013620.1 | D09              | 39552322 | 39555623 | - | 610 | 68213.9 | 4.96 | MGNNCFKT   | N | Y | 4 | I   | C M | 0 | N |
| GhCPK68 | Gh_D10G0130 | Ghir_D10G001600.1 | D10              | 1030951  | 1034394  | - | 551 | 62014.3 | 6.17 | MGCFSSKH   | Y | Y | 4 | II  | M   | 0 | N |
| GhCPK69 | Gh_D10G0863 | Ghir_D10G009490.1 | D10              | 10909734 | 10913532 | - | 544 | 61950.2 | 8.81 | MGICLSTT   | Y | Y | 4 | IV  | M   | 0 | N |
| GhCPK70 | Gh_D10G1303 | Ghir_D10G013990.1 | D10              | 24177574 | 24181997 | - | 495 | 56317.6 | 5.41 | MGSCISTQ   | Y | Y | 3 | III | M   | 0 | N |
| GhCPK71 | Gh_D10G2029 | Ghir_D10G021750.1 | D10              | 56010875 | 56015207 | - | 584 | 64984.3 | 5.14 | MGNTCVGP   | N | Y | 4 | I   | M   | 0 | N |
| GhCPK72 | Gh_D11G0227 | Ghir_D11G002390.1 | D11              | 1905499  | 1908419  | - | 530 | 60355.2 | 6.56 | MGNENRPP   | N | Y | 4 | II  | M   | 0 | N |
| GhCPK73 | Gh_D11G0314 | Ghir_D11G003360.1 | D11              | 2722348  | 2725395  | + | 550 | 62311.9 | 6.53 | MGNENACV   | N | Y | 4 | III | C M | 0 | N |
| GhCPK74 | Gh_D11G1774 | Ghir_D11G018640.1 | D11              | 19767240 | 19771544 | - | 554 | 62788.1 | 9.48 | MGACLSTT   | Y | Y | 4 | IV  | M   | 0 | N |
| GhCPK75 | Gh_D11G3329 | Ghir_D11G036410.1 | D11              | 66059614 | 66066098 | + | 527 | 59284.3 | 6.39 | MGNENRSP   | N | Y | 4 | III | M   | 0 | N |
| GhCPK76 | Gh_D12G0121 | Ghir_D12G001340.1 | D12              | 1591928  | 1594742  | - | 575 | 64573.8 | 6.07 | MRLHYCMR   | N | Y | 4 | I   | N   | 0 | Y |
| GhCPK77 | Gh_D12G2743 | Ghir_D12G024580.1 | scaffold4587_D12 | 20270    | 23886    | - | 534 | 60242.7 | 6.39 | MGNENSQP   | Y | Y | 4 | II  | C M | 0 | N |
| GhCPK78 | Gh_D13G0033 | Ghir_D13G000300.1 | D13              | 246690   | 250046   | - | 573 | 64084.6 | 6.22 | MGNENCVGP  | N | Y | 3 | I   | M   | 0 | N |
| GhCPK79 | Gh_D13G0560 | Ghir_D13G005790.1 | D13              | 7586741  | 7589365  | - | 523 | 58400.4 | 6.41 | MGNENCLGS  | N | Y | 4 | I   | M   | 0 | N |
| GhCPK80 | Gh_D13G0561 | Ghir_D13G005800.1 | D13              | 7614829  | 7617628  | - | 487 | 54631   | 4.86 | MRRRAIDHQ  | N | N | 4 | I   | C   | 0 | N |
| GhCPK81 | Gh_D13G1455 | Ghir_D13G015090.1 | D13              | 45574159 | 45578015 | + | 536 | 60415.3 | 6.37 | MGNENCLTKN | Y | Y | 4 | II  | M   | 0 | N |
| GhCPK82 | Gh_D13G2278 | Ghir_D13G023730.1 | D13              | 58814168 | 58818344 | + | 461 | 51476   | 6.4  | MGNENCTRG  | N | Y | 4 | II  | M   | 0 | N |

MW molecular weight, pI isoelectric points, M Cell membrane, C Cytoplasm, N nucleus

The myristoylation sites were predicted by the Myristoylator program (<http://web.expasy.org/myristoylator/>).

The palmitoylation sites were predicted by CPS-Palm (<http://lipid.biocuckoo.org/index.php>)

Number of EF-hands were predicted by SMART database (<http://smart.embl-heidelberg.de/>)

The subcellular localizatio were predicted by DeepLoc-2.0 (<https://services.healthtech.dtu.dk/services/DeepLoc-2.0/>)

The transmembrane domains were predicted by DeepTMHMM (<https://dtu.biolib.com/DeepTMHMM/>)

The signal peptides were predicted by SignalP-6 (<https://biolib.com/DTU/SignalP-6/>)

**Table S2 sgRNA of CDPK gene family mutant library in the *Gossypium hirsutum***

| sgRNA sequence                                | Targeted gene ID | Targeted gene name | sgRNA sequence                                 | Targeted gene ID            | Targeted gene name     |
|-----------------------------------------------|------------------|--------------------|------------------------------------------------|-----------------------------|------------------------|
| TCCTCTTCTCCGTTTCTGTG<br>TGGTGGAATTGGGGTTGAAC  | Gh_A01G0621      | GhCPK1             | ATCAAAGCTCACAGAGGCAG<br>CTCTCTGAAATAGAAGGCCA   | Gh_A01G0621 and Gh_D01G2360 | GhCPK1 and GhCPK44     |
| AATGAAGCAGACCATCTAGT<br>ACAAGGAAGGGTCCAAGACA  | Gh_A01G1119      | GhCPK2             | CTTTGCATCGAGAAAGGTAC<br>TGCTCGACAGAGATACGAAG   | Gh_A01G1119 and Gh_D01G1194 | GhCPK2 and GhCPK43     |
| GCAAGTTGTCCGCAACCACC<br>CCTTCCCTAAGTGTGTTGAAT | Gh_A02G0144      | GhCPK3             | CGACAAGTATCCATTCTCGT<br>AGAGACGGACTTCAGAAAAT   | Gh_A02G0144 and Gh_D02G0183 | GhCPK3 and GhCPK45     |
| GACAGCAGCAACCAAAGGAT<br>CGACAGCAGCAACCAAAGGA  | Gh_A02G0609      | GhCPK4             | CTTCAAGCGTGATAGCACGG<br>TGGAACATCAGGTTGTGCCT   | Gh_A02G0609 and Gh_D02G0663 | GhCPK4 and GhCPK46     |
| CAGTGGAAACAATTAGCTTCG<br>ATTGCACCACAGATCATCAA | Gh_A02G1029      | GhCPK5             | TGCAATGGTCTTCCGTCCAC<br>GGAAAGCAGCTAACTTGTGT   | Gh_A02G1029 and Gh_D03G0701 | GhCPK5 and Gh_D03G0701 |
| TCTTAGGGTAAAAGCACCAA<br>AGTGCACCGTGACATGAAAC  | Gh_A02G1635      | GhCPK6             | TGAGTATTCCGATTACCGGA<br>AACTCCGGAGGAACACTACGAA | Gh_A02G1635 and Gh_D03G0087 | GhCPK6 and GhCPK48     |
| GCAAGCTTAGGTAGAACTTA<br>TCACACCCAAGTTCATATCT  | Gh_A02G1796      | GhCPK7             | GTTCTAAATGATCCAACCTGG<br>AACAGCTTCTCATGAGAAGA  | Gh_A02G1796 and Gh_D03G0609 | GhCPK7 and GhCPK49     |
| GCAAATATGGAGAGATCCGT<br>CAGTCCATATTACGTTGCTC  | Gh_A03G1505      | GhCPK8             | ATAAGCATGAGAGATGCCCC<br>AGGCCAAGTTTTTACCGACG   | Gh_A03G1505 and Gh_D02G1973 | GhCPK8 and GhCPK47     |
| GTTGGACACAAGTATGTGAA<br>ATTCACAATTGCCCTGCACA  | Gh_A04G0148      | GhCPK9             | TGAGAAGTGAACCCAACAA<br>TGTCGAAAAGATGTTAACGC    | Gh_A04G0148 and Gh_D05G3567 | GhCPK9 and GhCPK59     |
| GAACAATGCCAATAAAGGCTT<br>GGTTGGAAGTCCATATTATG | Gh_A04G0467      | GhCPK10            | AAAGGCAGCTGCGCTTGCTA<br>GTAGCTATGATGCAAGACAC   | Gh_A04G0467 and Gh_D04G0900 | GhCPK10 and GhCPK52    |
| GTAGTAATGAACCAACCCGT<br>GAGGAAACTCAGAACTGCCG  | Gh_A04G0780      | GhCPK11            | TGGCTCTGAGGTTCTCAA<br>TGGAACCAGACCCAAAGCTC     | Gh_A04G0780 and Gh_D04G1271 | GhCPK11 and GhCPK53    |
| GGTCCTAAACCAGCCGAAGA<br>TTGCAGAAAAGTCTTCATG   | Gh_A04G1372      | GhCPK12            | GATCTTGTAAGAAGACCCT<br>GTTCCCTTCAGGCCATCCTT    | Gh_A04G1372 and Gh_D04G0895 | GhCPK12 and GhCPK51    |
| GTCGATATCGAAGACGAAGT<br>GCTAAGAAGAAGATGGTTGG  | Gh_A04G1429      | GhCPK13            | CTTTCTGCCTTATTTTCAGGA<br>GACGATTAAGGCACGTACG   | Gh_A04G1429 and Gh_D04G1486 | GhCPK13 and GhCPK54    |
| CGCTGCTTCTTTGCTTCGCA<br>GTCTAATATTGTCGAGCTCA  | Gh_A05G0617      | GhCPK14            | CTTACTTAGAACCTGCACTG<br>CTGAAGCACATAACCAAGAAG  | Gh_A05G0617 and Gh_D05G0748 | GhCPK14 and GhCPK55    |
| CTAACCACTGACAAGGACGT<br>GTTATTTGAATCACGGCCAA  | Gh_A05G1571      | GhCPK15            | GCTGATGCCTTGAATTCGAG<br>AGAGGAAAACATGAGCCGCG   | Gh_A05G1571 and Gh_D05G1749 | GhCPK15 and GhCPK56    |
| TTCAGCATAGCCGATGCCTT<br>TGTTGGGTCTTTCATTCCAA  | Gh_A05G2355      | GhCPK16            | CATAGCAGAGAGACTCTCTG<br>GATAATACAGCGGAATCCAG   | Gh_A05G2355 and Gh_D05G2622 | GhCPK16 and GhCPK57    |
| TAACATAAGACAACGTACCG<br>ATCCAAAGCCAAGCTGCGGA  | Gh_A05G2859      | GhCPK17            | TCGTTGGAGGAGCTTAAAGA<br>TTTGTCCAGGATGGTAATACG  | Gh_A05G2859 and Gh_D05G3156 | GhCPK17 and GhCPK58    |
| GGGTTCTGAACTTATGGAAT<br>GTTCCGAGTGACGGCAAATG  | Gh_A05G3246      | GhCPK18            | CAGTTTATTCAAGTGCACCG<br>GAAAGGGAAGAGAATCTGGT   | Gh_A05G3246 and Gh_D04G0366 | GhCPK18 and GhCPK50    |
| GATTTGTTGGACAGGATGGG<br>ACAGAAGCAAGCCCGATTGA  | Gh_A06G0013      | GhCPK19            | CATCAAGCAAATAATCTCCG<br>ACATAGCACCCGAAGTTCTT   | Gh_A06G1772 and Gh_D06G2206 | GhCPK20 and GhCPK60    |



|                                               |             |         |                                               |                             |                     |
|-----------------------------------------------|-------------|---------|-----------------------------------------------|-----------------------------|---------------------|
| AGTGAGGAAGATGTTGACAA<br>CTTGTTTTGTTGGCTAATGG  | Gh_A06G1772 | GhCPK20 | GATGCGCCAAAGCAAGCAGA<br>GATTACTAACCTGCCAGAA   | Gh_A07G1099 and Gh_D07G1198 | GhCPK21 and GhCPK61 |
| GCAGAAGGTTCCACCACGAG<br>GATGAACTCATCGTAGTCTA  | Gh_A07G1099 | GhCPK21 | TTGTGTACTGATCCCAACTC<br>GAAGGAAGCTTCCCCCTGA   | Gh_A07G1123 and Gh_D07G1228 | GhCPK22 and GhCPK62 |
| GCTAACATTGGCCAGACGAG<br>GCAAACAAGAACATCCACAA  | Gh_A07G1123 | GhCPK22 | ACCATAGATTCCGATAACAG<br>GGTCATTGCAGGATGTTTAT  | Gh_A08G2530 and Gh_D08G0142 | GhCPK23 and GhCPK63 |
| CACTTCGACAAAGACAATAG<br>GTATGGCACGTTTCATGATGT | Gh_A08G2530 | GhCPK23 | GAAAAGGAAACCCAAAGAGG<br>TGAGAAAAGGAAACCCAAAG  | Gh_A09G1033 and Gh_D09G1054 | GhCPK24 and GhCPK64 |
| CTTCACCTGTAAGAGATCCA<br>GGGGAGGCTGTATTATTCCT  | Gh_A09G1033 | GhCPK24 | GCTGAAGAAGAGAGACTAA<br>TTGTCAGTTGAGGAAGTAGC   | Gh_A09G1067 and Gh_D09G1074 | GhCPK25 and GhCPK65 |
| CAAGGGGACACTACACTGAA<br>TGGAGATGTTTTGGTTCAAG  | Gh_A09G1067 | GhCPK25 | AGTGGATGTTTGGAGTGCTG<br>TGATTGTTGAACGTGCAGGA  | Gh_A09G1157 and Gh_D09G1163 | GhCPK26 and GhCPK66 |
| TGAGGAACTAAGAGATGAGT<br>AGATGAGTTGGCTGATGAGC  | Gh_A09G1157 | GhCPK26 | CATCAGCCTGAACCCAACTG<br>CCTAGGACTAAAGAATCAAG  | Gh_A09G1248 and Gh_D09G1249 | GhCPK27 and GhCPK67 |
| TGGTGAACCTGACTTCACAT<br>CATCAGCCTGAACCCAACTG  | Gh_A09G1248 | GhCPK27 | AGACAAGCCAATAGGTAGCG<br>GGACGGGAGAATTAACTACG  | Gh_A10G0124 and Gh_D10G0130 | GhCPK28 and GhCPK68 |
| GGTGGATGAAGCCAGCATCA<br>TAGCAGCAAGCATAAATTGC  | Gh_A10G0124 | GhCPK28 | GCAGCAGTCAGTCTAGCCCCG<br>CTGTCACTAATTGTTGGCCA | Gh_A10G0886 and Gh_D10G0863 | GhCPK29 and GhCPK69 |
| CCATTCATGACGTGAACCAT<br>TTAGAGGCCCTGAAAGGCCA  | Gh_A10G0886 | GhCPK29 | GCTCTACTACAAGACGACCC<br>ATGATAGATCCGGTACCAAA  | Gh_A10G1195 and Gh_D10G1303 | GhCPK30 and GhCPK70 |
| TCGAAGATATTCTTCCCCGA<br>AAGTGGAACTAAGCTACG    | Gh_A10G1195 | GhCPK30 | AGGAGCTTATGAGGATGCAG<br>GGAAGCTTGCCATTCTTTGG  | Gh_A10G1756 and Gh_D10G2029 | GhCPK31 and GhCPK71 |
| TAAACCAGAGACCAAACAAG<br>CGGTGCGTATGTGCATTAGC  | Gh_A10G1756 | GhCPK31 | GATGCTACGACAAGATCCCA<br>TACGACAAGATCCCAAGGAA  | Gh_A11G0213 and Gh_D11G0227 | GhCPK32 and GhCPK72 |
| TTCCGACCAGAATCGGACAC<br>TATCTTTCAGGTCTGCAGGA  | Gh_A11G0213 | GhCPK32 | TGAAGAATCTCAAGGACACG<br>TTGCAGTTCGTAGAAGTCGG  | Gh_A11G1615 and Gh_D11G1774 | GhCPK33 and GhCPK74 |
| TTTCCTCCTTCTCTAACCCA<br>AGCTTCTCCAGCACACCCCGT | Gh_A11G1615 | GhCPK33 | TTTCACGTCTTCTCTTGCAA<br>TTACACTGAAAGAGCTGCCG  | Gh_A11G2941 and Gh_D11G3329 | GhCPK34 and GhCPK75 |
| GTAAACATCCTGTCAGCGTC<br>TACCTCGTGGATCGCAAGCT  | Gh_A11G2941 | GhCPK34 | ACATTATAGCAACCTCGCGT<br>TGTTCGGCAGATGTTAGAAC  | Gh_A11G3011 and Gh_D11G0314 | GhCPK35 and GhCPK73 |
| AGGTAATGCCAAACTCACCT<br>GAGTCACCGAACACGAATAG  | Gh_A11G3011 | GhCPK35 | TCCATGGATTTCCCAAAACG<br>GAATCGAAGACGAACCATG   | Gh_A12G0109 and Gh_D12G0121 | GhCPK36 and GhCPK76 |
| CAAGCATTACGGACCAGAAG<br>ATAGTGGGAGCATCGATTAT  | Gh_A12G0109 | GhCPK36 | ATGTAGTCCAGAAGTATTG<br>TTTGTGCCGGCAGATCGTGA   | Gh_A12G2686 and Gh_D12G2743 | GhCPK37 and GhCPK77 |
| ACCGTGTTCCTTACAGGA<br>TCCATCCTGTAGGAAGAACA    | Gh_A12G2686 | GhCPK37 | CTAAGCCTCCTCATGTGAAG<br>ATATTGACCAAGTCTTGCA   | Gh_A13G0017 and Gh_D13G0033 | GhCPK38 and GhCPK78 |
| TAGCGGCACAATTGATTATG<br>TCTTGCCTAGTCTCCGATTT  | Gh_A13G0017 | GhCPK38 | GAGCTGTCAACCGTTCTGAA<br>AGGAACTGTAACAGCGGGA   | Gh_A13G0563 and Gh_D13G0560 | GhCPK39 and GhCPK79 |
| TGTGCATTCACCCTTCAGAA<br>TTGACTTCAGCTCTTACCCA  | Gh_A13G0563 | GhCPK39 | CCTCAATAAACTAGAACGCG<br>TGGCTTGCAGAAATGTTTA   | Gh_A13G0566 and Gh_D13G0561 | GhCPK40 and GhCPK80 |

|                                                                                                                                                                                                                                                                                                                                                                                                                                                                                                                                                                                                                                                                                                                                                                                                                                                                                                                                                                                              |                                                                                                                                                                                                                                                                                                          |                                                                                                                                                                                                                          |                                                                                              |                                                            |                                            |
|----------------------------------------------------------------------------------------------------------------------------------------------------------------------------------------------------------------------------------------------------------------------------------------------------------------------------------------------------------------------------------------------------------------------------------------------------------------------------------------------------------------------------------------------------------------------------------------------------------------------------------------------------------------------------------------------------------------------------------------------------------------------------------------------------------------------------------------------------------------------------------------------------------------------------------------------------------------------------------------------|----------------------------------------------------------------------------------------------------------------------------------------------------------------------------------------------------------------------------------------------------------------------------------------------------------|--------------------------------------------------------------------------------------------------------------------------------------------------------------------------------------------------------------------------|----------------------------------------------------------------------------------------------|------------------------------------------------------------|--------------------------------------------|
| CAGCCAAATGGTGCATAATT<br>TATGTACCGAGATTTGCGACT<br>GTGTTAACATCCTGCAGACT<br>AACATCGATACTGACAACAG<br>ATAGGGCAAGCAATGAACAG<br>TTGGTGATGGAATTGTGCGG<br>CTTGCAAGTCGATCGCGAAA<br>CGTGCTCTAATGCAGGCCGT<br>AGATCAACTACGAGGAGTTC<br>CCTGATTAAGATGGAAGGTA<br>CAGAAAATCGGTCACTCTGT<br>CAGAAAATCGGTCACTCTGT<br>TCAACCGTAAAATGAGCGGA<br>CCGACGACAACAGCAACCAA<br>AGCTGAAAGTCTTTCCGAGG<br>ACTTCGGGAGCAACGTAATA<br>CACTTACGTTGCAATAGACA<br>TAGCAGTTCGTAAAAGCCGT<br>GGTCAACATCACCATGGCAA<br>GGATGACAATGCAGTCCATT<br>GCGTTCGGGGTGAAGTCAA<br>TCAATTTGGGAGACGCGTTC<br>TGGCTTAGGGTCTCTTCTCC<br>CCTGTCTGTGCAATAAGCAA<br>GGAAGGGAACAATGCCAAAA<br>AAGGGCAGCTGCACTTGCTA<br>ACAAAAACCATGTCATTGGG<br>CGATCTCGAAGAGGAAACTC<br>TGTGTACAGAGCTTTCCACG<br>GTCGATATCGAAGAGGAAGT<br>CATATAACTGCGTTGTCAAG<br>CAGAGCTTGCTCTAGTTCTT<br>GGTTTCTTCAAGTTGAACAC<br>GATAAACCTGAATGAAAGCG<br>GTCTTTCATTCCAAACGCAT<br>TGGTTGTTGCTGAATTGTGG<br>TCCCAATCCTCAATCCCGGA<br>TGAGGTTCAAATGTTGATGC<br>TGAAAGAGCAGCTGCTTCCA<br>GAAAGAGCAGCTGCTTCCAT | Gh_A13G0566<br>Gh_A13G1164<br>Gh_A13G1891<br>Gh_D01G1194<br>Gh_D01G2360<br>Gh_D02G0183<br>Gh_D02G0663<br>Gh_D02G1973<br>Gh_D03G0087<br>Gh_D03G0609<br>Gh_D04G0366<br>Gh_D04G0895<br>Gh_D04G0900<br>Gh_D04G1271<br>Gh_D04G1486<br>Gh_D05G0748<br>Gh_D05G1749<br>Gh_D05G2622<br>Gh_D05G3156<br>Gh_D05G3567 | GhCPK40<br>GhCPK41<br>GhCPK42<br>GhCPK43<br>GhCPK44<br>GhCPK45<br>GhCPK46<br>GhCPK47<br>GhCPK48<br>GhCPK49<br>GhCPK50<br>GhCPK51<br>GhCPK52<br>GhCPK53<br>GhCPK54<br>GhCPK55<br>GhCPK56<br>GhCPK57<br>GhCPK58<br>GhCPK59 | CAGCCTGCAAAAATAAAACCG<br>CTATCTGATAACAAGCCCGG<br>AAGGAGGTTAACAGCTGCC<br>ACACTTGAAGAACTCAGGCA | Gh_A13G1164 and Gh_D13G1455<br>Gh_A13G1891 and Gh_D13G2278 | GhCPK41 and GhCPK81<br>GhCPK42 and GhCPK82 |
|----------------------------------------------------------------------------------------------------------------------------------------------------------------------------------------------------------------------------------------------------------------------------------------------------------------------------------------------------------------------------------------------------------------------------------------------------------------------------------------------------------------------------------------------------------------------------------------------------------------------------------------------------------------------------------------------------------------------------------------------------------------------------------------------------------------------------------------------------------------------------------------------------------------------------------------------------------------------------------------------|----------------------------------------------------------------------------------------------------------------------------------------------------------------------------------------------------------------------------------------------------------------------------------------------------------|--------------------------------------------------------------------------------------------------------------------------------------------------------------------------------------------------------------------------|----------------------------------------------------------------------------------------------|------------------------------------------------------------|--------------------------------------------|

|                       |             |         |
|-----------------------|-------------|---------|
| TTAGTTTCGAAAACGACCCA  | Gh_D06G2206 | GhCPK60 |
| TGACGATGGACCCGAATGAG  |             |         |
| GTGTTGTGTAGGTGATTGCG  | Gh_D07G1198 | GhCPK61 |
| ATCACCAACCCACTGAATAG  |             |         |
| TGCTCTTTGTAACAGGTGAA  | Gh_D07G1228 | GhCPK62 |
| GCACTTCACCCATATTATGT  |             |         |
| AATGTTCTTCCCGATCCATT  | Gh_D08G0142 | GhCPK63 |
| TGATGTAATGTTGACAATT   |             |         |
| GAAGAAGCCAAGAGTCCTAA  | Gh_D09G1054 | GhCPK64 |
| TAGTGCTTGCTCTAGTTCTT  |             |         |
| TATGCAAGAGAATGAACGAG  | Gh_D09G1074 | GhCPK65 |
| AGGTTGATGTCTGGAGTGCT  |             |         |
| GTCACATTACTCAGAACCAG  | Gh_D09G1163 | GhCPK66 |
| AGATGAGTTGGCTGATGAGC  |             |         |
| ACAGACTGCTATAAAGAACG  | Gh_D09G1249 | GhCPK67 |
| AATCCTGAAGTTGGTAAGAG  |             |         |
| TAGCAGCAAACATAAACCGT  | Gh_D10G0130 | GhCPK68 |
| GCTATGAAGGAGTATGGAAT  |             |         |
| GTTGCCATAGGCAATGAAAA  | Gh_D10G0863 | GhCPK69 |
| GGATACACCTACGTTGCCAT  |             |         |
| TTTCCCCCAGATTAACGTTG  | Gh_D10G1303 | GhCPK70 |
| CTACGACGAGTTCACAACAA  |             |         |
| GAAGTCGGACTGAAAAGAGT  | Gh_D10G2029 | GhCPK71 |
| CTTGCAAATCGATTGCAAAG  |             |         |
| TCATTATGATGGGTACCGCC  | Gh_D11G0227 | GhCPK72 |
| CATTATGATGGGTACCGCCT  |             |         |
| AAAGAGTCCCACAGAAACAG  | Gh_D11G0314 | GhCPK73 |
| AGCTCGGCCGAGGTGAATTT  |             |         |
| AAATCAGTACGCTTCCCGCA  | Gh_D11G1774 | GhCPK74 |
| CGTGGTTCCTTCATCTTCCA  |             |         |
| GACGTGAAATCGAATTTCTC  | Gh_D11G3329 | GhCPK75 |
| CGTGCTTGCAGGAGTTCCAA  |             |         |
| CAAGCATTACGGACCGGAGG  | Gh_D12G0121 | GhCPK76 |
| TAGCGGGAGCATCGATTACG  |             |         |
| TTGATTTTCGCATCAGATCCA | Gh_D12G2743 | GhCPK77 |
| TAAGTGTTCTTCTACAGGA   |             |         |
| AATCTGTTTCAGCCGTAATG  | Gh_D13G0033 | GhCPK78 |
| ATAGCGGCACAATGATTATG  |             |         |
| GGCGAATGCACAACATCTTT  | Gh_D13G0560 | GhCPK79 |
| GGATGTGGAGGATGCTAGGA  |             |         |

|                      |             |         |
|----------------------|-------------|---------|
| GGCCTAAAGTGTAAGCTCA  | Gh_D13G0561 | GhCPK80 |
| TATGTACCGAGATTTGACC  |             |         |
| GTGCCAAGGATCTAGTCTGC | Gh_D13G1455 | GhCPK81 |
| ATTGTTGGCCAGAAACATGC |             |         |
| ATCGGAAAAGAACTAGGTCG | Gh_D13G2278 | GhCPK82 |
| AACTAGGTCGTGGTCAATTT |             |         |

**Table S3 Primers for constructing the vector mixing pool**

| Downstream primer                                    | Primer name | Upstream primer                       | Primer name |
|------------------------------------------------------|-------------|---------------------------------------|-------------|
| ttctagctctaaaacCACAGAAACGGAGAAGAGGAtgcaccagccgggaat  | GhCPK1      | AAGCATCAGATGggcaAACAAAGCACCAGTGGTCTAG | pRGEB32-7S  |
| ttctagctctaaaacGTTCAACCCCAATTCCACCAAtgcaccagccgggaat | GhCPK2      |                                       |             |
| ttctagctctaaaacACTAGATGGTCTGCTTCATtgcaccagccgggaat   | GhCPK3      |                                       |             |
| ttctagctctaaaacTGTCTTGGACCCTTCCTTGTtgcaccagccgggaat  | GhCPK4      |                                       |             |
| ttctagctctaaaacGGTGGTTGCCGACAACCTTGtgcaccagccgggaat  | GhCPK5      |                                       |             |
| ttctagctctaaaacATTCAAACACTTAGGGAAGGtgcaccagccgggaat  | GhCPK6      |                                       |             |
| ttctagctctaaaacATCCTTTGGTTGCTGCTGTtgcaccagccgggaat   | GhCPK7      |                                       |             |
| ttctagctctaaaacTCCTTTGGTTGCTGCTGTCGtgcaccagccgggaat  | GhCPK8      |                                       |             |
| ttctagctctaaaacCGAAGCTAATTGTTCCACTGtgcaccagccgggaat  | GhCPK9      |                                       |             |
| ttctagctctaaaacTTGATGATCTGTGGTGCAAtgcaccagccgggaat   | GhCPK10     |                                       |             |
| ttctagctctaaaacTTGGTGCTTTTACCCTAAGAtgcaccagccgggaat  | GhCPK11     |                                       |             |
| ttctagctctaaaacGTTTCATGTACGGTGCACtgcaccagccgggaat    | GhCPK12     |                                       |             |
| ttctagctctaaaacTAAGTTCTACCTAAGCTTGtgcaccagccgggaat   | GhCPK13     |                                       |             |
| ttctagctctaaaacAGATATGAACTTGGGTGTGAtgcaccagccgggaat  | GhCPK14     |                                       |             |
| ttctagctctaaaacACGGATCTCTCCATATTTGtgcaccagccgggaat   | GhCPK15     |                                       |             |
| ttctagctctaaaacGAGCAACGTAATATGGACTGtgcaccagccgggaat  | GhCPK16     |                                       |             |
| ttctagctctaaaacTTCACATACTTGTGTCCAACtgcaccagccgggaat  | GhCPK17     |                                       |             |
| ttctagctctaaaacTGTGCAGGGCAATTGTGAAtgcaccagccgggaat   | GhCPK18     |                                       |             |
| ttctagctctaaaacATAATCGATGCTCCACTAtgcaccagccgggaat    | GhCPK19     |                                       |             |
| ttctagctctaaaacCATAATATGGACTTCCAACtgcaccagccgggaat   | GhCPK20     |                                       |             |
| ttctagctctaaaacACGGGTTGGTTCATTACTAtgcaccagccgggaat   |             |                                       |             |
| ttctagctctaaaacCGGCAGTTCTGAGTTTCTCtgcaccagccgggaat   |             |                                       |             |
| ttctagctctaaaacTCTTCGGCTGGTTTAGGACCtgcaccagccgggaat  |             |                                       |             |
| ttctagctctaaaacCATGAAGCAGTTTTCTGCAAtgcaccagccgggaat  |             |                                       |             |
| ttctagctctaaaacACTTCGTCTTCGATATCGACtgcaccagccgggaat  |             |                                       |             |
| ttctagctctaaaacCCAACCATCTTCTTAGCtgcaccagccgggaat     |             |                                       |             |
| ttctagctctaaaacTGCGAAGCAAAGAAGCAGCGtgcaccagccgggaat  |             |                                       |             |
| ttctagctctaaaacTGAGCTCGACAATATTAGACtgcaccagccgggaat  |             |                                       |             |
| ttctagctctaaaacACGTCCTTGTGAGTGGTTAGtgcaccagccgggaat  |             |                                       |             |
| ttctagctctaaaacTTGGCCGTGATTCAAATAACtgcaccagccgggaat  |             |                                       |             |
| ttctagctctaaaacAAGGCATCGGCTATGCTGAAtgcaccagccgggaat  |             |                                       |             |
| ttctagctctaaaacTTGGAATGAAAGACCCAACAtgcaccagccgggaat  |             |                                       |             |
| ttctagctctaaaacCGGTACGTTGTCTTATGTTAtgcaccagccgggaat  |             |                                       |             |
| ttctagctctaaaacTCCGCAGCTTGGCTTTGGATtgcaccagccgggaat  |             |                                       |             |
| ttctagctctaaaacATTCCATAAGTTCAGAACCCtgcaccagccgggaat  |             |                                       |             |
| ttctagctctaaaacCATTTGCCGTCACCTCCGAACtgcaccagccgggaat |             |                                       |             |
| ttctagctctaaaacCCCATCCTGTCCAACAAATCtgcaccagccgggaat  |             |                                       |             |



|                                                      |         |
|------------------------------------------------------|---------|
| ttctagctctaaaacTCAATCGGGCTTGCTTCTGTgcaccagccgggaat   | GhCPK17 |
| ttctagctctaaaacTTGTCAACATCTTCCCTCACTgcaccagccgggaat  | GhCPK20 |
| ttctagctctaaaacCCATTAGCCAACAAAACAAGTgcaccagccgggaat  | GhCPK21 |
| ttctagctctaaaacGCTGGTGGTGAACCTTCTGCTgcaccagccgggaat  | GhCPK22 |
| ttctagctctaaaacTAGACTACGATGAGTTCATCgcaccagccgggaat   | GhCPK23 |
| ttctagctctaaaacCTCGTCTGGCCAATGTTAGCgcaccagccgggaat   | GhCPK24 |
| ttctagctctaaaacTTGTGGATGTTCTTGTGTTGCTgcaccagccgggaat | GhCPK25 |
| ttctagctctaaaacCTATTGTCTTTGTCTGAAGTgcaccagccgggaat   | GhCPK26 |
| ttctagctctaaaacACATCATGAACGTGCCATACgcaccagccgggaat   | GhCPK27 |
| ttctagctctaaaacTGGATCTCTTACAGGTGAAGTgcaccagccgggaat  | GhCPK28 |
| ttctagctctaaaacAGGAATAATACAGCCTCCCCgcaccagccgggaat   | GhCPK29 |
| ttctagctctaaaacTTCAGTGTAGTGTCCCCTTgcaccagccgggaat    | GhCPK30 |
| ttctagctctaaaacCTTGAACCAAAACATCTCCATgcaccagccgggaat  | GhCPK31 |
| ttctagctctaaaacACTCATCTCTTAGTTCCTCAgcaccagccgggaat   | GhCPK32 |
| ttctagctctaaaacGCTCATCAGCCAACCTCATCTgcaccagccgggaat  | GhCPK33 |
| ttctagctctaaaacATGTGAAGTCAGGTTACCAgcaccagccgggaat    | GhCPK34 |
| ttctagctctaaaacATAATCGATGCTCCCCTATgcaccagccgggaat    | GhCPK35 |
| ttctagctctaaaacTGATGCTGGCTTCATCCACCGgcaccagccgggaat  | GhCPK36 |
| ttctagctctaaaacGCAATTTATGCTTGCTGCTAgcaccagccgggaat   | GhCPK37 |
| ttctagctctaaaacATGGTTCACGTCATGAATGGgcaccagccgggaat   | GhCPK38 |
| ttctagctctaaaacTGGCCTTTCAGGGCCTCTAATgcaccagccgggaat  |         |
| ttctagctctaaaacTCGGGGAAGAATATCTTCGATgcaccagccgggaat  |         |
| ttctagctctaaaacCGTAGCTTAGTGTCCACTTgcaccagccgggaat    |         |
| ttctagctctaaaacCTTGTTTGGTCTCTGGTTTAtgcaccagccgggaat  |         |
| ttctagctctaaaacGCTAATGCACATACGCACCGgcaccagccgggaat   |         |
| ttctagctctaaaacGTGTCCGATTCTGGTCGGAAgcaccagccgggaat   |         |
| ttctagctctaaaacTCCTGCAGACCTGAAAGATgcaccagccgggaat    |         |
| ttctagctctaaaacTGGGTTAGAGAAGGAGGAAAtgcaccagccgggaat  |         |
| ttctagctctaaaacACGGGTGTGCTGGAGAAGCTgcaccagccgggaat   |         |
| ttctagctctaaaacGACGCTGACAGGATGTTTACTgcaccagccgggaat  |         |
| ttctagctctaaaacAGCTTGCGATCCACGAGGTgcaccagccgggaat    |         |
| ttctagctctaaaacAGGTGAGTTTGGCATTACCTgcaccagccgggaat   |         |
| ttctagctctaaaacCTATTCGTGTTCCGGTGACTCgcaccagccgggaat  |         |
| ttctagctctaaaacCTTCTGGTCCGTAATGCTTgcaccagccgggaat    |         |
| ttctagctctaaaacATAATCGATGCTCCCCTATgcaccagccgggaat    |         |
| ttctagctctaaaacTCCTGTAGGAAGAACACGGTgcaccagccgggaat   |         |
| ttctagctctaaaacTGTTCTTCCCTACAGGATGGgcaccagccgggaat   |         |
| ttctagctctaaaacCATAATCAATTGTGCCGCTAgcaccagccgggaat   |         |
| ttctagctctaaaacAAATCGGAGACTAGGCAAGAtgcaccagccgggaat  |         |

|                                                      |         |
|------------------------------------------------------|---------|
| ttctagctctaaaacTTCTGAAGGGTGAATGCACAtgcaccagccgggaat  | GhCPK39 |
| ttctagctctaaaacTGGGTAAGAGCTGAAGTCAAtgcaccagccgggaat  | GhCPK40 |
| ttctagctctaaaacAATTATGCACCATTTGGCTGtgcaccagccgggaat  | GhCPK41 |
| ttctagctctaaaacAGTCGAAATCTCGGTACATAAtgcaccagccgggaat | GhCPK42 |
| ttctagctctaaaacAGTCTGCAGGATGTAAACACtgcaccagccgggaat  | GhCPK43 |
| ttctagctctaaaacCTGTTGTCAGTATCGATGTTtgcaccagccgggaat  | GhCPK44 |
| ttctagctctaaaacCTGTTCAATTGCTTGCCCTATtgcaccagccgggaat | GhCPK45 |
| ttctagctctaaaacCCGCACAATTCCATCACCAAtgcaccagccgggaat  | GhCPK46 |
| ttctagctctaaaacTTTCGCGATCGACTTGCAAGtgcaccagccgggaat  | GhCPK47 |
| ttctagctctaaaacACGGCCTGCATTAGAGCACGtgcaccagccgggaat  | GhCPK48 |
| ttctagctctaaaacGAACTCCTCGTAGTTGATCTtgcaccagccgggaat  | GhCPK49 |
| ttctagctctaaaacTACCTTCCATCTTAATCAGGtgcaccagccgggaat  | GhCPK50 |
| ttctagctctaaaacACAGAGTGACCGATTTTCTGtgcaccagccgggaat  | GhCPK51 |
| ttctagctctaaaacACAGAGTGACCGATTTTCTGtgcaccagccgggaat  | GhCPK52 |
| ttctagctctaaaacTCCGCTCATTTTACGGTTGAtgcaccagccgggaat  | GhCPK53 |
| ttctagctctaaaacTTGGTTGCTGTTGTCTCGTtgcaccagccgggaat   | GhCPK54 |
| ttctagctctaaaacCCTCGGAAAGACTTTCAGCTtgcaccagccgggaat  | GhCPK55 |
| ttctagctctaaaacTATTACGTTGCTCCCGAAGTtgcaccagccgggaat  | GhCPK56 |
| ttctagctctaaaacTGTCTATTGCAACGTAAGTtgcaccagccgggaat   | GhCPK57 |
| ttctagctctaaaacACGGCTTTTACGAACTGCTAtgcaccagccgggaat  | GhCPK58 |
| ttctagctctaaaacTTGCCATGGTGATGTTGACtgcaccagccgggaat   |         |
| ttctagctctaaaacAATGGACTGCATTGTTCATCtgcaccagccgggaat  |         |
| ttctagctctaaaacTTTGACTTCACCCCGAACGtgcaccagccgggaat   |         |
| ttctagctctaaaacGAACGCGTCTCCCAAATTGAtgcaccagccgggaat  |         |
| ttctagctctaaaacGGAGAAGAGACCCTAAGCCAtgcaccagccgggaat  |         |
| ttctagctctaaaacTTGCTTATTGCACAGACAGGtgcaccagccgggaat  |         |
| ttctagctctaaaacTTTTGGCATTGTTCCCTTtgcaccagccgggaat    |         |
| ttctagctctaaaacTAGCAAGTGCAGCTGCCCTTtgcaccagccgggaat  |         |
| ttctagctctaaaacCCCAATGACATGGTTTTTGTtgcaccagccgggaat  |         |
| ttctagctctaaaacGAGTTTCCTCTTCGAGATCGtgcaccagccgggaat  |         |
| ttctagctctaaaacCGTGGAAAGCTCTGTACACAtgcaccagccgggaat  |         |
| ttctagctctaaaacACTTCCTCTTCGATATCGACtgcaccagccgggaat  |         |
| ttctagctctaaaacCTTGACAACGCAGTTATATGtgcaccagccgggaat  |         |
| ttctagctctaaaacAAGAAGTACAGCAAGCTCTGtgcaccagccgggaat  |         |
| ttctagctctaaaacGTGTTCAACTTGAAGAAACtgcaccagccgggaat   |         |
| ttctagctctaaaacCGCTTTCATTCAGGTTTATCtgcaccagccgggaat  |         |
| ttctagctctaaaacATGCGTTTGAATGAAAGACtgcaccagccgggaat   |         |
| ttctagctctaaaacCCACAATTCAGCAACAACAtgcaccagccgggaat   |         |
| ttctagctctaaaacTCCGGGATTGAGGATTGGGAtgcaccagccgggaat  |         |

|                                      |                |         |
|--------------------------------------|----------------|---------|
| ttctagctctaaaacGCATCAACATTTGAACCTCA  | gaccagccgggaat | GhCPK58 |
| ttctagctctaaaacTGGAAGCAGCTGCTCTTTC   | gaccagccgggaat | GhCPK59 |
| ttctagctctaaaacATGGAAGCAGCTGCTCTTTC  | gaccagccgggaat | GhCPK60 |
| ttctagctctaaaacTGGGTCGTTTTCGAAACTAA  | gaccagccgggaat | GhCPK61 |
| ttctagctctaaaacCTCATTCCGGGTCCATCGTCA | gaccagccgggaat | GhCPK62 |
| ttctagctctaaaacCGCAATCACCTACACAACAC  | gaccagccgggaat | GhCPK63 |
| ttctagctctaaaacCTATTCAGTGGGTTGGTGAT  | gaccagccgggaat | GhCPK64 |
| ttctagctctaaaacTTCACCTGTTACAAAGAGCA  | gaccagccgggaat | GhCPK65 |
| ttctagctctaaaacACATAATATGGGTGAAGTGC  | gaccagccgggaat | GhCPK66 |
| ttctagctctaaaacAATGGATCGGGAAGAACATT  | gaccagccgggaat | GhCPK67 |
| ttctagctctaaaacAATTGTTCGAACATTACATCA | gaccagccgggaat | GhCPK68 |
| ttctagctctaaaacTTAGGACTCTTGGCTTCTTC  | gaccagccgggaat | GhCPK69 |
| ttctagctctaaaacAAGAAGTAGAGCAAGCACTA  | gaccagccgggaat | GhCPK70 |
| ttctagctctaaaacCTCGTTCATTCTCTTGCATA  | gaccagccgggaat | GhCPK71 |
| ttctagctctaaaacAGCACTCCAGACATCAACCT  | gaccagccgggaat | GhCPK72 |
| ttctagctctaaaacCTGGTTCTGAGTAATGTGACT | gaccagccgggaat | GhCPK73 |
| ttctagctctaaaacGTCATCAGCCAACCTCATCT  | gaccagccgggaat | GhCPK74 |
| ttctagctctaaaacCGTTCCTTATAGCAGTCTGT  | gaccagccgggaat | GhCPK75 |
| ttctagctctaaaacCTCTTACCAACTTCAGGATT  | gaccagccgggaat | GhCPK76 |
| ttctagctctaaaacACGGTTTATGTTTGCTGCTA  | gaccagccgggaat | GhCPK77 |
| ttctagctctaaaacATTCCATACTCCTTCATAGC  | gaccagccgggaat |         |
| ttctagctctaaaacTTTTCATTGCCTATGGCAAC  | gaccagccgggaat |         |
| ttctagctctaaaacATGGCAACGTAGGTGTATCC  | gaccagccgggaat |         |
| ttctagctctaaaacCAACGTTAATCTGGGGGAAA  | gaccagccgggaat |         |
| ttctagctctaaaacTTGTTGTGAACTCGTCGTAG  | gaccagccgggaat |         |
| ttctagctctaaaacACTCTTTTCAGTCCGACTTCT | gaccagccgggaat |         |
| ttctagctctaaaacCTTTGCAATCGATTTGCAAG  | gaccagccgggaat |         |
| ttctagctctaaaacGGCGGTACCCATCATAATGA  | gaccagccgggaat |         |
| ttctagctctaaaacAGGCGGTACCCATCATAATG  | gaccagccgggaat |         |
| ttctagctctaaaacCTGTTTCTGTGGGACTCTTT  | gaccagccgggaat |         |
| ttctagctctaaaacAAATTCACCTCGGCCGAGCT  | gaccagccgggaat |         |
| ttctagctctaaaacTGCGGGAAGCGTACTGATTT  | gaccagccgggaat |         |
| ttctagctctaaaacTGGAAGATGAAGGAACCACG  | gaccagccgggaat |         |
| ttctagctctaaaacGAGAAATTCGATTTACAGT   | gaccagccgggaat |         |
| ttctagctctaaaacTTGGAACCTCCTGCAAGCACG | gaccagccgggaat |         |
| ttctagctctaaaacCCTCCGGTCCGTAATGCTTG  | gaccagccgggaat |         |
| ttctagctctaaaacCGTAATCGATGCTCCCGCTA  | gaccagccgggaat |         |
| ttctagctctaaaacTGGATCTGATGCGAAATCA   | gaccagccgggaat |         |
| ttctagctctaaaacTCCTGTAGGAAGAACA      | gaccagccgggaat |         |

|                                                      |                        |
|------------------------------------------------------|------------------------|
| ttctagctctaaaacCATTACGGCTGAAACAGATTtgcaccagccgggaat  | GhCPK78                |
| ttctagctctaaaacCATAATCATTGTGCCGCTATtgcaccagccgggaat  | GhCPK79                |
| ttctagctctaaaacAAAGATGTTGTGCATTCGCCtgcaccagccgggaat  | GhCPK80                |
| ttctagctctaaaacTCCTAGCATCCTCCACATCCtgcaccagccgggaat  | GhCPK81                |
| ttctagctctaaaacTGAGCTTTACACTTTAGGCCtgcaccagccgggaat  | GhCPK82                |
| ttctagctctaaaacGGTCAAATCTCGGTACATAtgcaccagccgggaat   | GhCPK1 and GhCPK44     |
| ttctagctctaaaacGCAGACTAGATCCTTGGCACtgcaccagccgggaat  | GhCPK2 and GhCPK43     |
| ttctagctctaaaacGCATGTTTCTGGCCAACAATtgcaccagccgggaat  | GhCPK3 and GhCPK45     |
| ttctagctctaaaacCGACCTAGTTCTTTTCCGATtgcaccagccgggaat  | GhCPK4 and GhCPK46     |
| ttctagctctaaaacAAATTGACCACGACCTAGTTtgcaccagccgggaat  | GhCPK5 and Gh_D03G0701 |
| ttctagctctaaaacCTGCCTCTGTGAGCTTTGATtgcaccagccgggaat  | GhCPK6 and GhCPK48     |
| ttctagctctaaaacTGGCCTTCTATTTTCAGAGAGtgcaccagccgggaat | GhCPK7 and GhCPK49     |
| ttctagctctaaaacGTACCTTTCTCGATGCAAAGtgcaccagccgggaat  | GhCPK8 and GhCPK47     |
| ttctagctctaaaacCTTCGTATCTCTGTGAGCAAtgcaccagccgggaat  | GhCPK9 and GhCPK59     |
| ttctagctctaaaacACGAGAATGGATACTTGTCTGtgcaccagccgggaat | GhCPK10 and GhCPK52    |
| ttctagctctaaaacATTTTCTGAAGTCCGTCTCTtgcaccagccgggaat  | GhCPK11 and GhCPK53    |
| ttctagctctaaaacCCGTGCTATCACGCTTGAAGtgcaccagccgggaat  | GhCPK12 and GhCPK51    |
| ttctagctctaaaacAGGCACAACCTGATGTTCCAtgcaccagccgggaat  | GhCPK13 and GhCPK54    |
| ttctagctctaaaacGTGGACGGAAGACCATTGCAtgcaccagccgggaat  | GhCPK14 and GhCPK55    |
| ttctagctctaaaacACACAAGTTAGCTGCTTTCCtgcaccagccgggaat  | GhCPK15 and GhCPK56    |
| ttctagctctaaaacTCCGGTAATCGGAATACTCAtgcaccagccgggaat  |                        |
| ttctagctctaaaacTTCGTAGTTCCCTCCGGAGTTtgcaccagccgggaat |                        |
| ttctagctctaaaacCCAGTTGGATCATTTAGAACTgcaccagccgggaat  |                        |
| ttctagctctaaaacTCTTCTCATGAGAAGCTGTTtgcaccagccgggaat  |                        |
| ttctagctctaaaacGGGGCATCTCTCATGCTTATtgcaccagccgggaat  |                        |
| ttctagctctaaaacCGTCGGTAAAACTTGGCCTtgcaccagccgggaat   |                        |
| ttctagctctaaaacTTGTTGGGTTCCACTTCTCAtgcaccagccgggaat  |                        |
| ttctagctctaaaacGCGTTAACATCTTTTCGGACAtgcaccagccgggaat |                        |
| ttctagctctaaaacTAGCAAGCGCAGCTGCCTTTtgcaccagccgggaat  |                        |
| ttctagctctaaaacGTGTCTTGCATCATAGCTACtgcaccagccgggaat  |                        |
| ttctagctctaaaacTTTGAGAACCTCAGGAGCCAtgcaccagccgggaat  |                        |
| ttctagctctaaaacGAGCTTTGGGTCTGGTTCCAtgcaccagccgggaat  |                        |
| ttctagctctaaaacAGGGTCTTCTTACCAAGATCtgcaccagccgggaat  |                        |
| ttctagctctaaaacAAGGATGGCCTGAAAGGAACtgcaccagccgggaat  |                        |
| ttctagctctaaaacTCCTGAAATAAGGCAGAAAGtgcaccagccgggaat  |                        |
| ttctagctctaaaacCGTACGTGCCTTTAATCGTCtgcaccagccgggaat  |                        |
| ttctagctctaaaacCAGTGCAGGTTCTAAGTAAGtgcaccagccgggaat  |                        |
| ttctagctctaaaacCTTCTTGGTATGTGCTTCAGtgcaccagccgggaat  |                        |
| ttctagctctaaaacCTCGAATTCAAGGCATCAGCtgcaccagccgggaat  |                        |

ttctagctctaaaacCGCGGCTCATGTTTTCTCTtgcaccagccgggaat  
ttctagctctaaaacCAGAGAGTCTCTCTGCTATGtgcaccagccgggaat  
ttctagctctaaaacCTGGATTCCGCTGTATTATCtgcaccagccgggaat  
ttctagctctaaaacTCTTTAAGCTCCTCCAACGAtgcaccagccgggaat  
ttctagctctaaaacCGTATTACCATCCTGACAAAtgcaccagccgggaat  
ttctagctctaaaacCGGTGCACTTGAATAAACTGtgcaccagccgggaat  
ttctagctctaaaacACCAGATTCTCTTCCCTTTtgcaccagccgggaat  
ttctagctctaaaacCGGAGATTATTTGCTTGATGtgcaccagccgggaat  
ttctagctctaaaacAAGAACTTCGGGTGCTATGTtgcaccagccgggaat  
ttctagctctaaaacCTGCTTGCTTTGGCGCATCtgcaccagccgggaat  
ttctagctctaaaacTTCTGGGCAGGTTAGTAATCtgcaccagccgggaat  
ttctagctctaaaacGAGTTGGGATCAGTACACAAtgcaccagccgggaat  
ttctagctctaaaacTCAAGGGGAAGCTTCCCTTtgcaccagccgggaat  
ttctagctctaaaacCTGTTATCGGAATCTATGGTtgcaccagccgggaat  
ttctagctctaaaacATAAACATCCTGCAATGACCTtgcaccagccgggaat  
ttctagctctaaaacCCTCTTTGGGTTTTCTTTTtgcaccagccgggaat  
ttctagctctaaaacCTTTGGGTTTCTTTTCTCAtgcaccagccgggaat  
ttctagctctaaaacTTAGTGCTCTCTTCTTCAGCtgcaccagccgggaat  
ttctagctctaaaacGCTACTTCCTCAACTGACAAAtgcaccagccgggaat  
ttctagctctaaaacCAGCACTCCAAACATCCACTtgcaccagccgggaat  
ttctagctctaaaacTCCTGCACGTTCAACAATCAtgcaccagccgggaat  
ttctagctctaaaacCAGTTGGGTTTCAGGCTGATGtgcaccagccgggaat  
ttctagctctaaaacCTTGATTCTTTAGTCTAGGtgcaccagccgggaat  
ttctagctctaaaacCGCTACCTATTGGCTTGTCTtgcaccagccgggaat  
ttctagctctaaaacCGTAGTTAATTCTCCCGTCCtgcaccagccgggaat  
ttctagctctaaaacCGGGCTAGACTGACTGCTGtgcaccagccgggaat  
ttctagctctaaaacTGGCCAACAATTAGTGACAGtgcaccagccgggaat  
ttctagctctaaaacGGGTTCGTCTTGTAGTAGAGCtgcaccagccgggaat  
ttctagctctaaaacTTTGGTACCGGATCTATCATtgcaccagccgggaat  
ttctagctctaaaacCTGCATCCTCATAAGCTCCTtgcaccagccgggaat  
ttctagctctaaaacCCAAAGAATGGCAAGCTTCCtgcaccagccgggaat  
ttctagctctaaaacTGGGATCCTGTCGTAGCATCtgcaccagccgggaat  
ttctagctctaaaacTTCCTTGGGATCCTGTCGTAtgcaccagccgggaat  
ttctagctctaaaacCGTGTCTTGGAGATTCTTCAtgcaccagccgggaat  
ttctagctctaaaacCCGACTTCTACGAACTGCAAtgcaccagccgggaat  
ttctagctctaaaacTTGCAAGAGAAGACGTGAAAtgcaccagccgggaat  
ttctagctctaaaacCGGCAGCTCTTTCAGTGTAAtgcaccagccgggaat  
ttctagctctaaaacACGCGAGGTTGCTATAATGTtgcaccagccgggaat  
ttctagctctaaaacGTTCTAACATCTGCCGAACAtgcaccagccgggaat

GhCPK15 and GhCPK56

GhCPK16 and GhCPK57

GhCPK17 and GhCPK58

GhCPK18 and GhCPK59

GhCPK20 and GhCPK60

GhCPK21 and GhCPK61

GhCPK22 and GhCPK62

GhCPK23 and GhCPK63

GhCPK24 and GhCPK64

GhCPK25 and GhCPK65

GhCPK26 and GhCPK66

GhCPK27 and GhCPK67

GhCPK28 and GhCPK68

GhCPK29 and GhCPK69

GhCPK30 and GhCPK70

GhCPK31 and GhCPK71

GhCPK32 and GhCPK72

GhCPK33 and GhCPK74

GhCPK34 and GhCPK75

GhCPK35 and GhCPK73



ttctagctctaaaacCGTTTTGGGAAATCCATGGAAtgcaccagccgggaat  
ttctagctctaaaacCATGGTTCGTCTTCCGATTCtgcaccagccgggaat  
ttctagctctaaaacCAATACTTCTGGAGCTACATtgcaccagccgggaat  
ttctagctctaaaacTCACGATCTGCCGGCACAAAtgcaccagccgggaat  
ttctagctctaaaacCTTCACATGAGGAGGCTTAGtgcaccagccgggaat  
ttctagctctaaaacTGCAAGACTTGGTTCGAATATtgcaccagccgggaat  
ttctagctctaaaacTTCAGAACGGTTGACAGCTCtgcaccagccgggaat  
ttctagctctaaaacTCCCGCTGTTTACAGTTCCTtgcaccagccgggaat  
ttctagctctaaaacCGCGTTCTAGTTTATTGAGGtgcaccagccgggaat  
ttctagctctaaaacTAAACATTTCTCGCAAGCCAtgcaccagccgggaat  
ttctagctctaaaacCGGTTTTATTTTGCAGGCTGtgcaccagccgggaat  
ttctagctctaaaacCCGGGCTTGTTATCAGATAGtgcaccagccgggaat  
ttctagctctaaaacGGGCAGCTGTAAACCTCCTTtgcaccagccgggaat  
ttctagctctaaaacTGCCTGAGTTCTTCAAGTGTtgcaccagccgggaat

GhCPK36 amd GhCPK76

GhCPK37 and GhCPK77

GhCPK38 and GhCPK78

GhCPK39 and GhCPK79

GhCPK40 and GhCPK80

GhCPK41 and GhCPK81

GhCPK42 and GhCPK82

**Table S4 Validation of vector library construction for pool 1**

| Targeted gene ID | Targeted gene name | sgRNA sequence                                | Count  | Gene covered |
|------------------|--------------------|-----------------------------------------------|--------|--------------|
| Gh_A01G0621      | GhCPK1             | TCCTCTTCTCCGTTTCTGTG<br>TGGTGAATTGGGGTTGAAC   | 4<br>6 | Yes          |
| Gh_A01G1119      | GhCPK2             | AATGAAGCAGACCATCTAGT<br>ACAAGGAAGGGTCCAAGACA  | 2<br>0 | Yes          |
| Gh_A02G0144      | GhCPK3             | GCAAGTTGTCGGCAACCACC<br>CCTTCCCTAAGTGTGTTGAAT | 5<br>4 | Yes          |
| Gh_A02G0609      | GhCPK4             | GACAGCAGCAACCAAAGGAT<br>CGACAGCAGCAACCAAAGGA  | 2<br>1 | Yes          |
| Gh_A02G1029      | GhCPK5             | CAGTGAACAATTAGCTTCG<br>ATTGCACCACAGATCATCAA   | 2<br>5 | Yes          |
| Gh_A02G1635      | GhCPK6             | TCTTAGGGTAAAAGCACCAA<br>AGTGCACCGTGACATGAAAC  | 1<br>4 | Yes          |
| Gh_A02G1796      | GhCPK7             | GCAAGCTTAGGTAGAACTTA<br>TCACACCCAAGTTCATATCT  | 0<br>1 | Yes          |
| Gh_A03G1505      | GhCPK8             | GCAAATATGGAGAGATCCGT<br>CAGTCCATATTACGTTGCTC  | 1<br>3 | Yes          |
| Gh_A04G0148      | GhCPK9             | GTTGGACACAAGTATGTGAA<br>ATTCACAATTGCCCTGCACA  | 3<br>3 | Yes          |
| Gh_A04G0467      | GhCPK10            | GAACAATGCCAATAAGGCTT<br>GGTTGGAAGTCCATATTATG  | 3<br>4 | Yes          |
| Gh_A04G0780      | GhCPK11            | GTAGTAATGAACCAACCCGT<br>GAGGAACTCAGAACTGCCG   | 1<br>1 | Yes          |
| Gh_A04G1372      | GhCPK12            | GGTCCTAAACCAGCCGAAGA<br>TTGCAGAAAAGTCTTCATG   | 2<br>1 | Yes          |
| Gh_A04G1429      | GhCPK13            | GTCGATATCGAAGACGAAGT<br>GCTAAGAAGAAGATGGTTGG  | 0<br>3 | Yes          |
| Gh_A05G0617      | GhCPK14            | CGCTGCTTCTTTGCTTCGCA<br>GTCTAATATTGTCGAGCTCA  | 2<br>2 | Yes          |
| Gh_A05G1571      | GhCPK15            | CTAACCACTGACAAGGACGT<br>GTTATTTGAATCAGGCCAA   | 3<br>3 | Yes          |
| Gh_A05G2355      | GhCPK16            | TTCAGCATAGCCGATGCCTT<br>TGTTGGTCTTTCATTCCAA   | 1<br>2 | Yes          |
| Gh_A05G2859      | GhCPK17            | TAACATAAGACAACGTACCG<br>ATCCAAAGCCAAGCTGCGGA  | 3<br>2 | Yes          |
| Gh_A05G3246      | GhCPK18            | GGGTTCTGAAGTATGGAAT<br>GTTCGGAGTGACGGCAAATG   | 5<br>5 | Yes          |
| Gh_A06G0013      | GhCPK19            | GATTTGTTGGACAGGATGGG<br>ACAGAAGCAAGCCCGATTGA  | 2<br>5 | Yes          |
| Gh_A06G1772      | GhCPK20            | AGTGAGGAAGATGTTGACAA<br>CTTGTTTTGTTGGCTAATGG  | 0<br>3 | Yes          |

**Table S5 Primers for sgRNA high throughput detection**

| <b>Primer name</b> | <b>Primer sequence</b>        |
|--------------------|-------------------------------|
| GTL-1-F            | GACgcctagAGAAGCATCAGATGGGCAAA |
| GTL-2-F            | GACgcgctaAGAAGCATCAGATGGGCAAA |
| GTL-3-F            | GACgcggatAGAAGCATCAGATGGGCAAA |
| GTL-4-F            | GACgcgtaAGAAGCATCAGATGGGCAAA  |
| GTL-5-F            | GACgctacgAGAAGCATCAGATGGGCAAA |
| GTL-6-F            | GACgtacgaAGAAGCATCAGATGGGCAAA |
| GTL-7-F            | GACgtcacgAGAAGCATCAGATGGGCAAA |
| GTL-8-F            | GACgtcgctAGAAGCATCAGATGGGCAAA |
| GTL-9-F            | GACgtcgtaAGAAGCATCAGATGGGCAAA |
| GTL-10-F           | GACgtggacAGAAGCATCAGATGGGCAAA |
| GTL-11-F           | GACgacatgAGAAGCATCAGATGGGCAAA |
| GTL-12-F           | GACgacgtaAGAAGCATCAGATGGGCAAA |
| GTL-13-F           | GACgactgtAGAAGCATCAGATGGGCAAA |
| GTL-14-F           | GACgagtcaAGAAGCATCAGATGGGCAAA |
| GTL-15-F           | GACgatcgaAGAAGCATCAGATGGGCAAA |
| GTL-16-F           | GACgcaccgAGAAGCATCAGATGGGCAAA |
| GTL-1-R            | GACacgtcaGACCCGAATTTGTGGACCTG |
| GTL-2-R            | GACaccatgGACCCGAATTTGTGGACCTG |
| GTL-3-R            | GACacgagcGACCCGAATTTGTGGACCTG |
| GTL-4-R            | GACacagcgGACCCGAATTTGTGGACCTG |
| GTL-5-R            | GACatgatgGACCCGAATTTGTGGACCTG |
| GTL-6-R            | GACatcateGACCCGAATTTGTGGACCTG |
| GTL-7-R            | GACatggtcGACCCGAATTTGTGGACCTG |
| GTL-8-R            | GACatgctgGACCCGAATTTGTGGACCTG |
| GTL-9-R            | GACagcacgGACCCGAATTTGTGGACCTG |
| GTL-10-R           | GACagctcaGACCCGAATTTGTGGACCTG |
| GTL-11-R           | GACagatgtGACCCGAATTTGTGGACCTG |
| GTL-12-R           | GACagacgaGACCCGAATTTGTGGACCTG |

**Table S6 Primers for gene editing detection of *GhCPKs* mutant library materials**

| Primer sequence                                     | sgRNA                 | Gene ID     | Gene name |
|-----------------------------------------------------|-----------------------|-------------|-----------|
| TCCATTTTGGGCAGGTAA<br>AGGTCCTTGGCACTCTCTG           | TCCTCTTCTCCGTTTCTGTG  | Gh_A01G0621 | GhCPK1    |
| AATGACCCAAAGACAACAATC<br>GTGGTCCCGAACTGTCCT         | ACAAGGAAGGGTCCAAGACA  | Gh_A01G1119 | GhCPK2    |
| TAATCAATCATCATCAATACCGA<br>TCGTAATCTTCACGGCATAA     | GACAGCAGCAACCAAAGGAT  | Gh_A02G0609 | GhCPK4    |
| TAATCAATCATCATCAATACCGA<br>TCGTAATCTTCACGGCATAA     | CGACAGCAGCAACCAAAGGA  | Gh_A02G0609 | GhCPK4    |
| AGAAGAAATTATTGGTTTGAAGG<br>GTAAATTGTTTAAAAGCACAGTGA | CAGTGGAAACAATTAGCTTCG | Gh_A02G1029 | GhCPK5    |
| AATCTTAGTTTTCTTCAAGTTTC<br>GAGCACTTTACCTTTAGAGCAA   | ATTGCACCACAGATCATCAA  | Gh_A02G1029 | GhCPK5    |
| AAAGTTGCGGCTGAGTGTC<br>AGTCTGGACGTGTTGACTTAAA       | AGTGCACCGTGACATGAAAC  | Gh_A02G1635 | GhCPK6    |
| GATGGATACTGCCAATAGAGG<br>GTCTGTGCCGCCAAATATC        | GCAAGCTTAGGTAGAACTTA  | Gh_A02G1796 | GhCPK7    |
| GAAAAAAGAAGCAAAATCCATT<br>CAATGTCAACGTCAGTCCTTAG    | TCACACCCAAGTTCATATCT  | Gh_A02G1796 | GhCPK7    |
| ATAATGAAACCGATGTCGTCTG<br>ATACATCTGCTTCTGGTCCATAAT  | CAGTCCATATTACGTTGCTC  | Gh_A03G1505 | GhCPK8    |
| TCAACTCAAGCCCTAGGTA<br>CATAAACCGCATAATTTCAATC       | GTTGGACACAAGTATGTGAA  | Gh_A04G0148 | GhCPK9    |
| ATGTGCTGGTGGTGAGTTGT<br>CGAAATCAGTAGCCTTCAAAA       | ATTCACAATTGCCCTGCACA  | Gh_A04G0148 | GhCPK9    |
| TGAGAACACTGCCCTGTAC<br>CGAATTGTCCTTGACCTAACTT       | GAACAATGCCAATAAGGCTT  | Gh_A04G0467 | GhCPK10   |
| GAGAGTTCGGCGTTACTTATCT<br>AACCGCATTGTCGTCTC         | GAGGAAACTCAGAACTGCCG  | Gh_A04G0780 | GhCPK11   |
| ATGGGAAATGTTTGTGCTACA<br>GCCTTTGGCTTAGGGTCT         | GGTCCTAAACCAGCCGAAGA  | Gh_A04G1372 | GhCPK12   |
| CCAGCGAACAAGAAAGCA<br>TCCCTCCTAACATCATCCAC          | GTCGATATCGAAGACGAAGT  | Gh_A04G1429 | GhCPK13   |
| AAGCATTCCGTTTCAATTGG                                | CGCTGCTTCTTTGCTTCGCA  | Gh_A05G0617 | GhCPK14   |

|                          |                       |             |         |
|--------------------------|-----------------------|-------------|---------|
| AGGGGAATCTTCATCCTTATT    | CGCTGCTTCTTTGCTTCCCA  | Gh_A05G0617 | GhCPK14 |
| CAAGGAGGATATTGAGGATGTT   | GTCTAATATTGTCTGAGCTCA | Gh_A05G0617 | GhCPK14 |
| CGTGCGAAGCAAAGAAGC       |                       |             |         |
| ATTGAAAAGGCTACGAAACG     | CTAACCACTGACAAGGACGT  | Gh_A05G1571 | GhCPK15 |
| CATAAGCACCTTTGAACTCCA    |                       |             |         |
| TTGTGGAGTGCCTTCAGC       | GTTATTTGAATCACGGCCAA  | Gh_A05G1571 | GhCPK15 |
| TATCTGGTAAAAGGGAACGAC    |                       |             |         |
| ATTTCTTATTCGGAGGTGTTCT   | TGTTGGGTCTTTTCATTCCAA | Gh_A05G2355 | GhCPK16 |
| TCATTTAATATCCTGTGTTGGG   |                       |             |         |
| GTTTCGACATAAGAACGGGA     | ATCCAAAGCCAAGCTGCGGA  | Gh_A05G2859 | GhCPK17 |
| ATGACCTTTAGCGACGATTC     |                       |             |         |
| AGAAATCGGTGGTCTGAAAG     | GGGTTCTGAACTTATGGAAT  | Gh_A05G3246 | GhCPK18 |
| TAGCAAAGGATCAAAAAGTAAGTG |                       |             |         |
| AGAAATCGGTGGTCTGAAAG     | GTTCCGAGTGACGGCAAATG  | Gh_A05G3246 | GhCPK18 |
| TAGCAAAGGATCAAAAAGTAAGTG |                       |             |         |
| ATGGATCGGGAAGAACATCT     | CACTTCGACAAAGACAATAG  | Gh_A08G2530 | GhCPK23 |
| GCATACCATACTCACGGAGAG    |                       |             |         |
| GCGCATATTATATTGCACCAG    | GTATGGCACGTTTCATGATGT | Gh_A08G2530 | GhCPK23 |
| CCTTTTAGTTTTCGCCATGAAT   |                       |             |         |
| TTTTACAAGCCAGGTTGAGAT    | CTTCACCTGTAAGAGATCCA  | Gh_A09G1033 | GhCPK24 |
| TTCAGGTCCATATTTCTCTTT    |                       |             |         |
| CCATCACGGTGGAAACAAG      | GGGGAGGCTGTATTATTCCT  | Gh_A09G1033 | GhCPK24 |
| ATGTTGTAGGTGGCTGTAATGT   |                       |             |         |
| GAAGCATTGCGCCAAGC        | CAAGGGGACACTACACTGAA  | Gh_A09G1067 | GhCPK25 |
| AACCTGAACAACCTTCGACAAT   |                       |             |         |
| TCTGCGAGATTCCTTAAACG     | TGGAGATGTTTTGGTTCAAG  | Gh_A09G1067 | GhCPK25 |
| TGCAACAAACTCCTCGTAACT    |                       |             |         |
| TTTACTGCCATCTCCATTCAC    | AGATGAGTTGGCTGATGAGC  | Gh_A09G1157 | GhCPK26 |
| ACCAGTCTAACCTTGCTGTGTC   |                       |             |         |
| CATTTTGGGGTGGTAAGACT     | TGGTGAACCTGACTTCACAT  | Gh_A09G1248 | GhCPK27 |
| TTGGGGTTTCTAACAAGCAT     |                       |             |         |
| TGCCGCTTGTTTGATGTTA      | GGTGGATGAAGCCAGCATCA  | Gh_A10G0124 | GhCPK28 |
| TGTTCCAAAAGTTTGATTTGC    |                       |             |         |
| ATGGGTTGTTTTAGCAGCA      | TAGCAGCAAGCATAAATTGC  | Gh_A10G0124 | GhCPK28 |
| AAGGCTTCAAAGGGACAGA      |                       |             |         |

|                          |                       |             |         |
|--------------------------|-----------------------|-------------|---------|
| CGGTATAAGCATAGTGGGACTT   | TTAGAGGCCCTGAAAGGCCA  | Gh_A10G0886 | GhCPK29 |
| GAACTGAATGAACAGCCATAAT   |                       |             |         |
| TGTACCGATTCCAAAACATTAT   | AAGTGGAACACTAAGCTACG  | Gh_A10G1195 | GhCPK30 |
| AAGTTCTTCGACTTCGATGTAA   |                       |             |         |
| CCCGAATGCCTGATGACT       | TAAACCAGAGACCAAACAAG  | Gh_A10G1756 | GhCPK31 |
| CTGCACTGGACACCCTTTT      |                       |             |         |
| AAATGCAGAGTGAGGTCAACAT   | TATCTTTCAGGTCTGCAGGA  | Gh_A11G0213 | GhCPK32 |
| CGATATTCATCACCTTTTCTT    |                       |             |         |
| ACGCTAAGGAAAAGGATGGA     | TTTCCTCCTTCTCTAACCCA  | Gh_A11G1615 | GhCPK33 |
| CGGGAAGACAACTAGATTACC    |                       |             |         |
| TGTGACGGGATAGACCTTGT     | GTAAACATCCTGTCAGCGTC  | Gh_A11G2941 | GhCPK34 |
| TGGTCTTACTGTGCCTGCTA     |                       |             |         |
| TGGTTGGAAGCCCGTATT       | CAAGCATTACGGACCAGAAG  | Gh_A12G0109 | GhCPK36 |
| ACACATAGAAGTGCCTTGAAAATC |                       |             |         |
| TATTTCAATTTGTTCTCAGGCTG  | ATAGTGGGAGCATCGATTAT  | Gh_A12G0109 | GhCPK36 |
| GATGTAGCCACTGTTGTCCCTA   |                       |             |         |
| CATTTTCGGATGTGATTCTTTC   | ACCGTGTTCTTCCTACAGGA  | Gh_A12G2686 | GhCPK37 |
| TGCGTCTTCGGTTATTGG       |                       |             |         |
| CATTTTCGGATGTGATTCTTTC   | TCCATCCTGTAGGAAGAACA  | Gh_A12G2686 | GhCPK37 |
| TGCGTCTTCGGTTATTGG       |                       |             |         |
| AAGGAATCTTCGCTGCTGT      | TGTGCATTACCCCTTCAGAA  | Gh_A13G0563 | GhCPK39 |
| CATGACCATCAAACAGATAATAAT |                       |             |         |
| GGACAGGGACAGTTTGGG       | CAGCCAAATGGTGCATAATT  | Gh_A13G0566 | GhCPK40 |
| CTATCAAACAGTTCGCCTCC     |                       |             |         |
| GGACAGGGACAGTTTGGG       | TATGTACCGAGATTTGACT   | Gh_A13G0566 | GhCPK40 |
| CTATCAAACAGTTCGCCTCC     |                       |             |         |
| AATGCTAATGTGTGACCTGACT   | AACATCGATACTGACAACAG  | Gh_A13G1164 | GhCPK41 |
| TAGATCCCAGTCGAGCTAATC    |                       |             |         |
| GGGACAACCTAATATCGTGG     | TTGGTGATGGAATTGTGCGG  | Gh_A13G1891 | GhCPK42 |
| GCATAATCGTCCGAAGCA       |                       |             |         |
| TGGTGCTAATCTTGCTGAATC    | CGTGCTCTAATGCAGGCCGT  | Gh_D01G1194 | GhCPK43 |
| ATCTGCCTGTGATTCCCAA      |                       |             |         |
| TTGATCTTATCCTTAACCCCTAA  | CCTGATTAAGATGGAAGGTA  | Gh_D01G2360 | GhCPK44 |
| AAACTTCAAATGCCATAGTCA    |                       |             |         |
| TGATGGACACCGACGAGA       | CAGAAAATCGGCTCACTCTGT | Gh_D02G0183 | GhCPK45 |

|                           |                      |             |         |
|---------------------------|----------------------|-------------|---------|
| GATTATGTCCGCAACCGTA       | CAGAAAACGGTACCTCTGT  | Gh_D02G0163 | GhCPK45 |
| CTTTACCTGAATACCCCGAC      | TCAACCGTAAAATGAGCGGA | Gh_D02G0663 | GhCPK46 |
| CCTTCATACAAGCAAGAAAAAT    | CCGACGACAACAGCAACCAA | Gh_D02G0663 | GhCPK46 |
| TAATCAATCATCATCAATACCGA   | AGCTGAAAGTCTTTCCGAGG | Gh_D02G1973 | GhCPK47 |
| TCGTAATCTTCACGGCATAA      | ACTTCGGGAGCAACGTAATA | Gh_D02G1973 | GhCPK47 |
| AGCTGTTTCTCATTAACATGCT    | CACTTACGTTGCAATAGACA | Gh_D03G0087 | GhCPK48 |
| TTCAAGGTAGAGCCGTATCTTC    | TAGCAGTTCGTAAAAGCCGT | Gh_D03G0087 | GhCPK48 |
| TGTGTGGTTTACAATGTTAGGC    | GGTCAACATCACCATGGCAA | Gh_D03G0609 | GhCPK49 |
| ATCAATACCTGCCCAAATG       | GCGTTCGGGGTGAAGTCAAA | Gh_D04G0366 | GhCPK50 |
| ACCGAAGAAACAAAGTGGG       | TGGCTTAGGGTCTCTTCTCC | Gh_D04G0895 | GhCPK51 |
| ATCCAGAAGCACAAATCAA       | CCTGTCTGTGCAATAAGCAA | Gh_D04G0895 | GhCPK51 |
| TTGCCCGTTTTATTAGTAGGA     | AAGGGCAGCTGCACTTGCTA | Gh_D04G0900 | GhCPK52 |
| CTACAACCTTCTGAGTATTCCGATT | CGATCTCGAAGAGGAAACTC | Gh_D04G1271 | GhCPK53 |
| AGAAAGGAAAAAGAAGCAGAA     | TGTGTACAGAGCTTTCCACG | Gh_D04G1486 | GhCPK54 |
| CAATGTCAACGGCAGTCC        | CATATAACTGCGTTGTCAAG | Gh_D05G0748 | GhCPK55 |
| TGTAATAAACAGGATGGACAAAT   | CAGAGCTTGCTCTAGTTCTT | Gh_D05G0748 | GhCPK55 |
| TCAAACCTGAACTATTCAATTCCTT | GGTTTCTTCAAGTTGAACAC | Gh_D05G1749 | GhCPK56 |
| CCGACAACGAAGGTGAGA        | GTCTTTCATTCCAAACGCAT | Gh_D05G2622 | GhCPK57 |
| ATAGGCGTGGACATTGACAT      |                      |             |         |
| GCGTCCGACATGGATATATTA     |                      |             |         |
| GGGCTTCCAACCACATCA        |                      |             |         |
| CTTACGAAGATGCTGTGGCTAT    |                      |             |         |
| ATTTTCGGGCTTGAGGTC        |                      |             |         |
| GAGTTCGGCGTTACTTATCTTT    |                      |             |         |
| GAACCGCATTGTCGTCCT        |                      |             |         |
| ATAAGACTCCCAACATTCGTG     |                      |             |         |
| ATCTCCCTCCTAACATCATCC     |                      |             |         |
| TGGCTCATTGTTTTGTTTCG      |                      |             |         |
| CGCAAAGCAACTTTCTTGAA      |                      |             |         |
| AAAGACAACAGCGGGTAATG      |                      |             |         |
| CAACTTCAGAAACGATTCCTT     |                      |             |         |
| AAAGCCCTTCAAATCTCCC       |                      |             |         |
| ACTGGACTGCACACGAGCT       |                      |             |         |
| ATTTCTTATTCGGAGGTGTTCT    |                      |             |         |
| TCATTTAATATCCTGTGTTGGG    |                      |             |         |



|                                                                         |                         |             |         |
|-------------------------------------------------------------------------|-------------------------|-------------|---------|
| GGCAGAGGCATTTATGTTGT<br>AAGAAGAATGTCCGCTACACA<br>CAATTATCGTTGGAGGAGCT   | TGGTTGTTGCTGAATTGTGG    | Gh_D05G2622 | GhCPK57 |
| ACGTACACCATTTTCATGTAAAT<br>AGGATTATTGCCAAAGGACA<br>CCGATAACCCGAAATCAGTA | TGAGGTTCAAATGTTGATGC    | Gh_D05G3156 | GhCPK58 |
| AGGATTATTGCCAAAGGACA<br>CCGATAACCCGAAATCAGTA<br>AGGATTATTGCCAAAGGACA    | TGAAAGAGCAGCTGCTTCCA    | Gh_D05G3567 | GhCPK59 |
| CCGATAACCCGAAATCAGTA<br>AGATGTTCTGTTCCGATTGTATT<br>CTCATTCGGGTCCATCGT   | GAAAGAGCAGCTGCTTCCAT    | Gh_D05G3567 | GhCPK59 |
| AATCAATAATTTCTGAAAATTGT<br>CGCTGTTATCGGTGTCCA                           | TTAGTTTCGAAAACGACCCA    | Gh_D06G2206 | GhCPK60 |
| TTCTGAAGTTGACATCGATAATG<br>TTTCCTCATCATTGCCACA                          | GTGTTGTGTAGGTGATTGCG    | Gh_D07G1198 | GhCPK61 |
| CAGATTTGCAGATCCTAGTGG<br>TGTAAGTGTTTCATCATTCCGCC                        | ATCACCAACCCACTGAATAG    | Gh_D07G1198 | GhCPK61 |
| TAACAAAAGGCGGATGCG<br>ACTATCGTTACCCGCTGTTG                              | GCACTTCACCCATATTATGT    | Gh_D07G1228 | GhCPK62 |
| CATTGAAAACACACCCCAT<br>GTTATCGTGCCGCTGTTAT                              | AATGTTCTTCCCGATCCATT    | Gh_D08G0142 | GhCPK63 |
| TGCCAATGAAAAGGGAGAC<br>CCAATGTTGTAGGTGGCTTTA                            | CAACAACAAGAACAATTTCA    | Gh_D08G0142 | GhCPK63 |
| ACAATAGCGGGTAATCATAGTTT<br>TATCAATATCAACTTCGGAATG                       | GAAGAAGCCAAGAGTCCTAA    | Gh_D09G1054 | GhCPK64 |
| CGGTTCCGTTGGATTCTT<br>AATTCAGAGTTCCATCACCATC                            | TAGTGCTTGCTCTAGTTCTT    | Gh_D09G1054 | GhCPK64 |
| TCAATGAGATTGTGGGAAGC<br>CTGGATGCACACATTGTCTCT                           | TATGCAAGAGAATGAACGAG    | Gh_D09G1074 | GhCPK65 |
| GAAGAAGTCATTACTIONGCCATCA<br>TTGCTTCCCATTCTTCTTATT                      | AGGTTGATGTCTGGAGTGCT    | Gh_D09G1074 | GhCPK65 |
| TTTACTGCCATCTCCATTAC<br>ACCAGTCTAACCTTGTCTGTGTC                         | GTCACATTACTIONCAGAACCAG | Gh_D09G1163 | GhCPK66 |
| AGGGAACAAGAAGGGAAATC<br>TGCTCTTAACATTATGGGG                             | AGATGAGTTGGCTGATGAGC    | Gh_D09G1163 | GhCPK66 |
| TGTAAGCCAAACGAGAAGGA                                                    | ACAGACTGCTATAAAGAACG    | Gh_D09G1249 | GhCPK67 |
|                                                                         | AATGCTGAACTTGCTAAGAG    | Gh_D09G1249 | GhCPK67 |

|                          |                       |             |         |
|--------------------------|-----------------------|-------------|---------|
| CAATGCCTCCCTAAATCCA      | AAATCTGAAATTCGTAAGAA  | Gh_D10G1247 | GhCPK67 |
| CAGTTCAAAGCCAAGCCTA      | GTTGCCATAGGCAATGAAAA  | Gh_D10G0863 | GhCPK69 |
| AAAGAATACCTTCATTTTCTCAAT | GGATACACCTACGTTGCCAT  | Gh_D10G0863 | GhCPK69 |
| CAGTTCAAAGCCAAGCCTA      | CTTGCAAATCGATTGCAAAG  | Gh_D10G2029 | GhCPK71 |
| AAAGAATACCTTCATTTTCTCAAT | TCATTATGATGGGTACCGCC  | Gh_D11G0227 | GhCPK72 |
| TTGGGACGACTTTCTTTG       | CATTATGATGGGTACCGCCT  | Gh_D11G0227 | GhCPK72 |
| ACAACATGAACTGCCACTGC     | AAAGAGTCCCACAGAAACAG  | Gh_D11G0314 | GhCPK73 |
| ATGGGTAACGTGAACCGTCC     | AGCTCGGCCGAGGTGAATTT  | Gh_D11G0314 | GhCPK73 |
| CGATGGGTGGAGTGTTGG       | AAATCAGTACGCTTCCCCGA  | Gh_D11G1774 | GhCPK74 |
| ATGGGTAACGTGAACCGTCC     | CGTGCTTGCAGGAGTTCCAA  | Gh_D11G3329 | GhCPK75 |
| CGATGGGTGGAGTGTTGG       | CAAGCATTACGGACCGGAGG  | Gh_D12G0121 | GhCPK76 |
| TGTGTGGGTTTTGGCTTG       | TAGCGGGAGCATCGATTACG  | Gh_D12G0121 | GhCPK76 |
| AAATATCAAGCTGAAATCCATG   | TTGATTTTCGCATCAGATCCA | Gh_D12G2743 | GhCPK77 |
| TCCGAGTTCTGAAAGATGTGA    | TAAGTGTTCTTCCTACAGGA  | Gh_D12G2743 | GhCPK77 |
| CTTCCGCTTGGAGATTGAC      | AATCTGTTTCAGCCGTAATG  | Gh_D13G0033 | GhCPK78 |
| AACCCTCTGCCACCACTG       | GGCGAATGCACAACATCTTT  | Gh_D13G0560 | GhCPK79 |
| TTCCCAATGGTGTATCGCT      | GGATGTGGAGGATGCTAGGA  | Gh_D13G0560 | GhCPK79 |
| TCACGCCCGTAAAGATTCT      | GGCCTAAAGTGTAAGCTCA   | Gh_D13G0561 | GhCPK80 |
| GCGGTTCGATGCAAAGATA      |                       |             |         |
| GGTTGGAAGCCCCTATTA       |                       |             |         |
| AGAACCAAAGAAAAGAAACATC   |                       |             |         |
| GCTATTTTCATTTGTTCTCAGGC  |                       |             |         |
| GTTATGCTCGGCACAGGC       |                       |             |         |
| TTAAGCACGCCTATGGAATA     |                       |             |         |
| ATCTTTGGCACTGTTGGAAA     |                       |             |         |
| GACACAGACAGGGTATGCTTC    |                       |             |         |
| CTTGCGTCGTCGGTTATT       |                       |             |         |
| ATGGGTAATACTTGTGTAGGACC  |                       |             |         |
| TCTTTAGATGCTACTTCATTCCC  |                       |             |         |
| CGCTGCTGTGCTAAAAGG       |                       |             |         |
| ATTGCTTTGTATCAAGGTTTCAG  |                       |             |         |
| GACAAGGACAGTTTGGGATTA    |                       |             |         |
| CGTATAAAGTATCCTCATAAGCG  |                       |             |         |
| GAAGAGCCATTGATCACCAA     |                       |             |         |
| AATCTGAATCTCCCTCCTAACA   |                       |             |         |

|                                                  |                      |                             |                        |
|--------------------------------------------------|----------------------|-----------------------------|------------------------|
| GCAGAACTGAGAAGGGAATAT<br>AAATAAAGGCTGCTGTAAAGAA  | GTGCCAAGGATCTAGTCTGC | Gh_D13G1455                 | GhCPK81                |
| TCCCACCGTTACTTCACAT<br>CCGTTTCGCTATCGTCTTA       | ATCGGAAAAGAACTAGGTCG | Gh_D13G2278                 | GhCPK82                |
| TCCCACCGTTACTTCACAT<br>CCGTTTCGCTATCGTCTTA       | AACTAGGTCGTGGTCAATTT | Gh_D13G2278                 | GhCPK82                |
| ATGTGCAGGGTTGCAGGT<br>TCAGTCGTCGTGAGCTTCC        | CTTTGCATCGAGAAAGGTAC | Gh_A01G1119 and Gh_D01G1194 | GhCPK2 and GhCPK43     |
| TGACTTCTCATCTGATCCCTG<br>ATTCGATGGTTTTGATTAGT    | TGCTCGACAGAGATACGAAG | Gh_A01G1119 and Gh_D01G1194 | GhCPK2 and GhCPK43     |
| ATTTGATTATGGAAGTGTGTGC<br>GAGCCCGAAATCAGTAGGTT   | GGAAAGCAGCTAACTTGTGT | Gh_A02G1029 and Gh_D03G0701 | GhCPK5 and Gh_D03G0701 |
| GACCCTTTACTTGAGGAGGC<br>GATACCAGGCAAGCACAAA      | TGAGTATTCCGATTACCGGA | Gh_A02G1635 and Gh_D03G0087 | GhCPK6 and GhCPK48     |
| TGTTGATTTACCGAGTTTGT<br>ATTGTCACAAGAGTGCCAAAT    | AACTCCGGAGGAACTACGAA | Gh_A02G1635 and Gh_D03G0087 | GhCPK6 and GhCPK48     |
| AGAAAGGAAAAAAGAAGCAGAA<br>CAATGTCAACGGCAGTCC     | GTTCTAAATGATCCAAGTGG | Gh_A02G1796 and Gh_D03G0609 | GhCPK7 and GhCPK49     |
| GCATTTGTTTTTACAGGATGGT<br>AGAAAACCTGGAACATCTCTGT | TGAGAAGTGGAACCCAACAA | Gh_A04G0148 and Gh_D05G3567 | GhCPK9 and GhCPK59     |
| CTTACGAAGATGCTGTGGCTAT<br>GGCTTGAGGTCACGATGC     | AAAGGCAGCTGCGCTTGCTA | Gh_A04G0467 and Gh_D04G0900 | GhCPK10 and GhCPK52    |
| TCTTGCTGGTTGTAGATTTTATTC<br>AAAGACACTTACCAGCCCAA | TGGCTCCTGAGGTTCTCAA  | Gh_A04G0780 and Gh_D04G1271 | GhCPK11 and GhCPK53    |
| TCGTGGGTAAATAGATTTCAAA<br>ATCCACCTCCCTTCCCTG     | TGGAACCAGACCCAAAGCTC | Gh_A04G0780 and Gh_D04G1271 | GhCPK11 and GhCPK53    |
| GATTCTTTGGTGTAGACTATGGA<br>GTCTCAGCGGCAGAACTTA   | GTTCCTTTCAGGCCATCCTT | Gh_A04G1372 and Gh_D04G0895 | GhCPK12 and GhCPK51    |
| CAAAGAGGATGTGGATGATGTT<br>GTAATGCCCCCTCTGGATAA   | GACGATTAAAGGCACGTACG | Gh_A04G1429 and Gh_D04G1486 | GhCPK13 and GhCPK54    |
| GGGTCACTCTGGCAAATACTA<br>ATCGTCCACTGTTGTCTGT     | CATAGCAGAGACTCTCTG   | Gh_A05G2355 and Gh_D05G2622 | GhCPK16 and GhCPK57    |
| ATACAAAGCGAAAGGGAAGG<br>GCCTCTGCCAACTCTTTT       | TTTGTCAGGATGGTAATACG | Gh_A05G2859 and Gh_D05G3156 | GhCPK17 and GhCPK58    |
| CATTGACAACAACGGGACA                              | GAAAGGGAAGAGAATCTGGT | Gh_A05G3246 and Gh_D04G0366 | GhCPK18 and GhCPK50    |

|                           |                        |                             |                     |
|---------------------------|------------------------|-----------------------------|---------------------|
| ACGTCGCTTAATCCAAACTC      | CAAAAGGAAATGAGACTGGCAA | Gh_A06G1772 and Gh_D06G2206 | GhCPK18 and GhCPK59 |
| AGTGGGTGAGTTCCGAAATA      | CATCAAGCAAATAATCTCCG   | Gh_A06G1772 and Gh_D06G2206 | GhCPK20 and GhCPK60 |
| ATAGAAGAAGTTTCCGAGTTTG    | ACATAGCACCCGAAGTTCTT   | Gh_A06G1772 and Gh_D06G2206 | GhCPK20 and GhCPK60 |
| TTTCGGTTTGTCTGTCTTTATC    | GATTACTAACCTGCCAGAA    | Gh_A07G1099 and Gh_D07G1198 | GhCPK21 and GhCPK61 |
| TACAAGATAACACCAGCACTCC    | GGTCATTGCAGGATGTTTAT   | Gh_A08G2530 and Gh_D08G0142 | GhCPK23 and GhCPK63 |
| CCAACAGGTGAAGAATTCAAAG    | GGTCAATTGCAGGATGTTTAT  | Gh_A08G2530 and Gh_D08G0142 | GhCPK23 and GhCPK63 |
| AAAAGGAAATGAGACTGGCAA     | GGTCAATTGCAGGATGTTTAT  | Gh_A08G2530 and Gh_D08G0142 | GhCPK23 and GhCPK63 |
| CATTGAAAACACACCCCAT       | GGTCAATTGCAGGATGTTTAT  | Gh_A08G2530 and Gh_D08G0142 | GhCPK23 and GhCPK63 |
| GTTATCGTGCCGCTGTTAT       | GGTCAATTGCAGGATGTTTAT  | Gh_A08G2530 and Gh_D08G0142 | GhCPK23 and GhCPK63 |
| TATATCACTCACGGTATATCAAAAA | GGTCAATTGCAGGATGTTTAT  | Gh_A08G2530 and Gh_D08G0142 | GhCPK23 and GhCPK63 |
| TCATAAAATATAATCAACATCACGC | GGTCAATTGCAGGATGTTTAT  | Gh_A08G2530 and Gh_D08G0142 | GhCPK23 and GhCPK63 |
| GCTACAAAATGCCAAGAAAAG     | GGTCAATTGCAGGATGTTTAT  | Gh_A08G2530 and Gh_D08G0142 | GhCPK23 and GhCPK63 |
| CTCAGCAATCACCTGGAAAT      | GGTCAATTGCAGGATGTTTAT  | Gh_A08G2530 and Gh_D08G0142 | GhCPK23 and GhCPK63 |
| AGGTGAAAGGTTTACGGAGAT     | GGTCAATTGCAGGATGTTTAT  | Gh_A08G2530 and Gh_D08G0142 | GhCPK23 and GhCPK63 |
| GCCCTTGTGCGGTAGAAT        | GGTCAATTGCAGGATGTTTAT  | Gh_A08G2530 and Gh_D08G0142 | GhCPK23 and GhCPK63 |
| CTGATTATTAGGGTTAGGTTGC    | GGTCAATTGCAGGATGTTTAT  | Gh_A08G2530 and Gh_D08G0142 | GhCPK23 and GhCPK63 |
| TCACGGGTAGAACTTACTCTTA    | GGTCAATTGCAGGATGTTTAT  | Gh_A08G2530 and Gh_D08G0142 | GhCPK23 and GhCPK63 |
| GGCTGTAATCTCTGAAGTGGA     | GGTCAATTGCAGGATGTTTAT  | Gh_A08G2530 and Gh_D08G0142 | GhCPK23 and GhCPK63 |
| CTTTTTCAGTTTGTGTGTTCC     | GGTCAATTGCAGGATGTTTAT  | Gh_A08G2530 and Gh_D08G0142 | GhCPK23 and GhCPK63 |
| ATTTTGTTCACCTTCCAAGTTAC   | GGTCAATTGCAGGATGTTTAT  | Gh_A08G2530 and Gh_D08G0142 | GhCPK23 and GhCPK63 |
| GAGCAGCAGTCAGTCTAGCC      | GGTCAATTGCAGGATGTTTAT  | Gh_A08G2530 and Gh_D08G0142 | GhCPK23 and GhCPK63 |
| CAGCGACGACCAACTCTCT       | GGTCAATTGCAGGATGTTTAT  | Gh_A08G2530 and Gh_D08G0142 | GhCPK23 and GhCPK63 |
| CATGAAACATAAGATCAAAAACCT  | GGTCAATTGCAGGATGTTTAT  | Gh_A08G2530 and Gh_D08G0142 | GhCPK23 and GhCPK63 |
| CACAAGCGAACTAATAGATTCA    | GGTCAATTGCAGGATGTTTAT  | Gh_A08G2530 and Gh_D08G0142 | GhCPK23 and GhCPK63 |
| CGCCTATCCCCAATTCT         | GGTCAATTGCAGGATGTTTAT  | Gh_A08G2530 and Gh_D08G0142 | GhCPK23 and GhCPK63 |
| TGTGCTGGTGGAGAACTTTT      | GGTCAATTGCAGGATGTTTAT  | Gh_A08G2530 and Gh_D08G0142 | GhCPK23 and GhCPK63 |
| TCCTCCTGCTGATTCACAAA      | GGTCAATTGCAGGATGTTTAT  | Gh_A08G2530 and Gh_D08G0142 | GhCPK23 and GhCPK63 |
| TTCCGACAGTGCCAAAGAT       | GGTCAATTGCAGGATGTTTAT  | Gh_A08G2530 and Gh_D08G0142 | GhCPK23 and GhCPK63 |
| CAGATGATCTGCAGTTTATTTCTT  | GGTCAATTGCAGGATGTTTAT  | Gh_A08G2530 and Gh_D08G0142 | GhCPK23 and GhCPK63 |
| GCTTCTTTGTATTCGTCCTGAT    | GGTCAATTGCAGGATGTTTAT  | Gh_A08G2530 and Gh_D08G0142 | GhCPK23 and GhCPK63 |
| CTCCACAACAATCAAAACCAC     | GGTCAATTGCAGGATGTTTAT  | Gh_A08G2530 and Gh_D08G0142 | GhCPK23 and GhCPK63 |
| AGGTTCCATTGACCCTTTG       | GGTCAATTGCAGGATGTTTAT  | Gh_A08G2530 and Gh_D08G0142 | GhCPK23 and GhCPK63 |
| ATCAGATGAACAAGGTACATTCC   | GGTCAATTGCAGGATGTTTAT  | Gh_A08G2530 and Gh_D08G0142 | GhCPK23 and GhCPK63 |
| ATGGGGAATTGTTGTAGATCTC    | GGTCAATTGCAGGATGTTTAT  | Gh_A08G2530 and Gh_D08G0142 | GhCPK23 and GhCPK63 |
| TAAGTAACTCCGAACTCACCTC    | GGTCAATTGCAGGATGTTTAT  | Gh_A08G2530 and Gh_D08G0142 | GhCPK23 and GhCPK63 |

|                                                                                                                                                                                                                                                                                                                                                                                   |                                                                                                                                                                                             |                                                                                                                                                                                                                                                      |                                                                                                                                                                                      |
|-----------------------------------------------------------------------------------------------------------------------------------------------------------------------------------------------------------------------------------------------------------------------------------------------------------------------------------------------------------------------------------|---------------------------------------------------------------------------------------------------------------------------------------------------------------------------------------------|------------------------------------------------------------------------------------------------------------------------------------------------------------------------------------------------------------------------------------------------------|--------------------------------------------------------------------------------------------------------------------------------------------------------------------------------------|
| CGTGCAAGTCAATCTCCAA<br>TTCACAAAGCTCCATAACCA<br>TGTTGTTTAAAAATGTATCCCA<br>TAGTTTGTTTCATTGCCGAGA<br>AGGTAAAGACAGATACTTTTCGC<br>CAAATATCAGCTTCATGTCCAT<br>TAGGGAAACTGGGAATGAAG<br>AAAGGAAAGTTGTCCCGAAT<br>TTTGATCTTCACATTTTTTTCTC<br>ACCGTTTCTTGGGGTCTC<br>GCCCTAATATCCGATAGC<br>ATGATTCAAAAAGAAATGGAGA<br>GCCTGATCCTTTTGTGTTTTC<br>TCCCGTATCTCTGTATCCTTCA<br>AAGAAATAAGGGGATTGAAAGA | ACATTATAGCAACCTCGCGT<br>TCCATGGATTTCCCAAACG<br>ATGTAGCTCCAGAAGTATTG<br>CTAAGCCTCCTCATGTGAAG<br>ATATTCGACCAAGTCTTGCA<br>GAGCTGTCAACCGTTCTGAA<br>TGGCTTGCGAGAAATGTTTA<br>ACACTTGAAGAACTCAGGCA | Gh_A11G3011 and Gh_D11G0314<br>Gh_A12G0109 and Gh_D12G0121<br>Gh_A12G2686 and Gh_D12G2743<br>Gh_A13G0017 and Gh_D13G0033<br>Gh_A13G0017 and Gh_D13G0033<br>Gh_A13G0563 and Gh_D13G0560<br>Gh_A13G0566 and Gh_D13G0561<br>Gh_A13G1891 and Gh_D13G2278 | GhCPK35 and GhCPK73<br>GhCPK36 and GhCPK76<br>GhCPK37 and GhCPK77<br>GhCPK38 and GhCPK78<br>GhCPK38 and GhCPK78<br>GhCPK39 and GhCPK79<br>GhCPK40 and GhCPK80<br>GhCPK42 and GhCPK82 |
|-----------------------------------------------------------------------------------------------------------------------------------------------------------------------------------------------------------------------------------------------------------------------------------------------------------------------------------------------------------------------------------|---------------------------------------------------------------------------------------------------------------------------------------------------------------------------------------------|------------------------------------------------------------------------------------------------------------------------------------------------------------------------------------------------------------------------------------------------------|--------------------------------------------------------------------------------------------------------------------------------------------------------------------------------------|

---

**Table S7 The other primers used in this study**

| Primer        | Sequence                                             | Note                     |
|---------------|------------------------------------------------------|--------------------------|
| GhCPK33-OE-S  | ATGGGAGCCTGTCTCTCC                                   | Overexpression           |
| GhCPK33-OE-A  | CTATAACTTCCGAGAATTCCG                                | Overexpression           |
| GhCPK74-OE-S  | ATGGGAGCCTGTCTCTCC                                   | Overexpression           |
| GhCPK74-OE-A  | CTATAACTTCCGAGAATTCCG                                | Overexpression           |
| GhCPK33-QRT-S | CACCGCAAACATCAACCCT                                  | qRT-PCR                  |
| GhCPK33-QRT-A | GTAGAACTTGGCTTCCCTTTGA                               | qRT-PCR                  |
| GhCPK74-QRT-S | CACCGCAAACATCAACCCT                                  | qRT-PCR                  |
| GhCPK74-QRT-A | CGAACTTGGCTTCCCTTTGA                                 | qRT-PCR                  |
| GhCPK33-104-S | CAGGTACCCGGGGATCC ATGGGAGCCTGTCTCTCC                 | BiFC                     |
| GhCPK33-104-A | CTGCCACCGCCGTCGAC CTATAACTTCCGAGAATTCCG              | BiFC                     |
| GhCPK74-104-S | CAGGTACCCGGGGATCC ATGGGAGCCTGTCTCTCC                 | BiFC                     |
| GhCPK74-104-A | CTGCCACCGCCGTCGAC CTATAACTTCCGAGAATTCCG              | BiFC                     |
| GhCPK33-BD-S  | ATGGAGGCCGAATTC ATGGGAGCCTGTCTCTCC                   | Y2H                      |
| GhCPK33-BD-A  | GCAGGTGACGGATCC CTATAACTTCCGAGAATTCCG                | Y2H                      |
| GhCPK74-BD-S  | ATGGAGGCCGAATTC ATGGGAGCCTGTCTCTCC                   | Y2H                      |
| GhCPK74-BD-A  | GCAGGTGACGGATCC CTATAACTTCCGAGAATTCCG                | Y2H                      |
| GhCPK33-771-S | CTCGGTACCCGGGGATCC ATGGGAGCCTGTCTCTCC                | LCI                      |
| GhCPK33-771-A | TACGAGATCTGGTTCGAC CTATAACTTCCGAGAATTCCG             | LCI                      |
| GhCPK74-771-S | CTCGGTACCCGGGGATCC ATGGGAGCCTGTCTCTCC                | LCI                      |
| GhCPK74-771-A | TACGAGATCTGGTTCGAC CTATAACTTCCGAGAATTCCG             | LCI                      |
| GhCPK33-BP-S  | GGGGACAAGTTTGTACAAAAAAGCAGGCTCA ATGGGAGCCTGTCTCTCC   | Subcellular Localization |
| GhCPK33-BP-A  | GGGGACCACTTTGTACAAGAAAGCTGGGTA CTATAACTTCCGAGAATTCCG | Subcellular Localization |
| GhCPK74-BP-S  | GGGGACAAGTTTGTACAAAAAAGCAGGCTCA ATGGGAGCCTGTCTCTCC   | Subcellular Localization |
| GhCPK74-BP-A  | GGGGACCACTTTGTACAAGAAAGCTGGGTA CTATAACTTCCGAGAATTCCG | Subcellular Localization |
| GhSAMS1-AD-S  | CAGATTACGCTCATATG ATGGAGACCTTTCTATTACATC             | Y2H                      |
| GhSAMS1-AD-A  | TGCTTGGGTGGAATTC TTAAGATTGGGGCTTGTC                  | Y2H                      |
| GhSAMS2-AD-S  | CAGATTACGCTCATATG ATGGAGACCTTTCTATTACATCT            | Y2H                      |

|                |                                                  |         |
|----------------|--------------------------------------------------|---------|
| GhSAMS2-AD-A   | TGCTTGGGTGGAATTC TTAAGACTGAGGCTTCTCCCA           | Y2H     |
| GhSAMS1-106-S  | AGGACGCCGGCGGATCC ATGGAGACCTTTCTATTACATC         | BiFC    |
| GhSAMS1-106-A  | AAGCTCTGCAGGTCGAC TTAAGATTGGGGCTTGTCC            | BiFC    |
| GhSAMS2-106-S  | AGGACGCCGGCGGATCC ATGGAGACCTTTCTATTACATCT        | BiFC    |
| GhSAMS2-106-A  | AAGCTCTGCAGGTCGAC TTAAGACTGAGGCTTCTCCCA          | BiFC    |
| GhSAMS1-772-S  | GGCGGTACCCGGGATCCA ATGGAGACCTTTCTATTACATC        | LCI     |
| GhSAMS1-772-A  | AAGCTCTGCAGGTCGAC TTAAGATTGGGGCTTGTCC            | LCI     |
| GhSAMS2-772-S  | GGCGGTACCCGGGATCCA ATGGAGACCTTTCTATTACATCT       | LCI     |
| GhSAMS2-772-A  | AAGCTCTGCAGGTCGAC TTAAGACTGAGGCTTCTCCCA          | LCI     |
| GhSAMS1-QRT-S  | CATCAAGCCTGTCATCCCT                              | qRT-PCR |
| GhSAMS1-QRT-A  | CCAGCCACCATAAGTGTCAA                             | qRT-PCR |
| GhSAMS2-QRT-S  | AAACATGCACCAAGACCAAC                             | qRT-PCR |
| GhSAMS2-QRT-A  | TCAAGACCCACATCATCAGAA                            | qRT-PCR |
| GhSAMS1-VIGS-S | CAAAATGGCATGCCTGCAGACTAGT TATGCCACTGATGAAACCC    | VIGS    |
| GhSAMS1-VIGS-A | GAATTCACTAGACCTAGGGGCGCGCC TTGATGACATGCTCCTTGAGG | VIGS    |
| GhSAMS2-VIGS-S | CAAAATGGCATGCCTGCAGACTAGT GCCGCTCTATCGGATTTGT    | VIGS    |
| GhSAMS2-VIGS-A | GAATTCACTAGACCTAGGGGCGCGCC GTGCCATTCTTCCTAACCTCA | VIGS    |
