# Supplementary material for: CRISPR–Cas9-mediated construction of a cotton CDPK mutant library for identification of insect-resistance genes
Source: PubMed Central journal article supplement — Plant Commun. 2024 Aug 12;5(11):101047. doi: 10.1016/j.xplc.2024.101047 (PMC11589327; doi:10.1016/j.xplc.2024.101047), 2024-08-12
Supplement: mmc2.pdf [file mmc2.pdf]

# CRISPR–Cas9-mediated construction of a cotton *CDPK* mutant library for identification of insect-resistance genes

Fuqiu Wang<sup>1,5</sup>, Sijia Liang<sup>2,5</sup>, Guanying Wang<sup>1</sup>, Tianyu Hu<sup>1</sup>, Chunyang Fu<sup>1</sup>, Qiongqiong Wang<sup>1</sup>, Zhongping Xu<sup>1</sup>, Yibo Fan<sup>1</sup>, Lianlian Che<sup>1</sup>, Ling Min<sup>1</sup>, Bo Li<sup>3,\*</sup>, Lu Long<sup>4,\*</sup>, Wei Gao<sup>4,\*</sup>, Xianlong Zhang<sup>1</sup> and Shuangxia Jin<sup>1,\*</sup>

<sup>1</sup>Hubei Hongshan Laboratory, National Key Laboratory of Crop Genetic Improvement, Huazhong Agricultural University, Wuhan 430070, China

<sup>2</sup>Academy of Industry Innovation and Development, Huanghuai University, Zhumadian, Henan 463000, China

<sup>3</sup>Xinjiang Key Laboratory of Crop Biotechnology, Institute of Nuclear and Biological Technology, Xinjiang Academy of Agricultural Sciences, Urumqi 830091 Xinjiang, China

<sup>4</sup>National Key Laboratory of Cotton Bio-breeding and Integrated Utilization, School of Life Science, Henan University, Henan 475004, China

<sup>5</sup>These authors contributed equally to this article.

\*Correspondence: Bo Li ([libo@xaas.ac.cn](mailto:libo@xaas.ac.cn)), Lu Long ([lulong1826@163.com](mailto:lulong1826@163.com)), Wei Gao ([gaowei021@163.com](mailto:gaowei021@163.com)), Shuangxia Jin ([jsx@mail.hzau.edu.cn](mailto:jsx@mail.hzau.edu.cn))

<https://doi.org/10.1016/j.xplc.2024.101047>

## ABSTRACT

Calcium-dependent protein kinases (CDPKs) act as key signal transduction enzymes in plants, especially in response to diverse stresses, including herbivory. In this study, a comprehensive analysis of the *CDPK* gene family in upland cotton revealed that *GhCPKs* are widely expressed in multiple cotton tissues and respond positively to various biotic and abiotic stresses. We developed a strategy for screening insect-resistance genes from a CRISPR–Cas9 mutant library of *GhCPKs*. The library was created using 246 single-guide RNAs targeting the *GhCPK* gene family to generate 518 independent T0 plants. The average target-gene coverage was 86.18%, the genome editing rate was 89.49%, and the editing heritability was 82%. An insect bioassay in the field led to identification of 14 *GhCPK* mutants that are resistant or susceptible to insects. The mutant that showed the clearest insect resistance, *cpk33/74* (in which the homologous genes *GhCPK33* and *GhCPK74* were knocked out), was selected for further study. Oral secretions from *Spodoptera litura* induced a rapid influx of  $Ca^{2+}$  in *cpk33/74* leaves, resulting in a significant increase in jasmonic acid content. S-adenosylmethionine synthase is an important protein involved in plant stress response, and protein interaction experiments provided evidence for interactions of *GhCPK33* and *GhCPK74* with *GhSAMS1* and *GhSAM2*. In addition, virus-induced gene silencing of *GhSAMS1* and *GhSAM2* in cotton impaired defense against *S. litura*. This study demonstrates an effective strategy for constructing a mutant library of a gene family in a polyploid plant species and offers valuable insights into the role of CDPKs in the interaction between plants and herbivorous insects.

**Key words:** cotton, *CDPKs*, mutant library, CRISPR–Cas9,  $Ca^{2+}$  influx, insect resistance

Wang F., Liang S., Wang G., Hu T., Fu C., Wang Q., Xu Z., Fan Y., Che L., Min L., Li B., Long L., Gao W., Zhang X., and Jin S. (2024). CRISPR–Cas9-mediated construction of a cotton *CDPK* mutant library for identification of insect-resistance genes. *Plant Comm.* 5, 101047.

## INTRODUCTION

Cotton is a vital source of fiber, oil, and feed, making a significant contribution to global development (Chen et al., 2007). Throughout its growth period, cotton is constantly threatened by various herbivorous insects, which seriously affect yield and fiber quality. Insect pests have emerged as factors limiting the development of the cotton industry (Wu and Guo, 2005; Li

et al., 2020; Quan and Wu, 2023). The traditional strategy of molecular breeding for insect resistance in cotton involves the introduction of exogenous genes encoding *Bacillus*

---

Published by the Plant Communications Shanghai Editorial Office in association with Cell Press, an imprint of Elsevier Inc., on behalf of CSPB and CEMPS, CAS.

## Plant Communications

*thuringiensis* insecticidal protein into the cotton genome to enhance its insect resistance (Wu et al., 2008; Huang et al., 2013; Qiao et al., 2017). Although this method temporarily alleviates the pressure caused by insect pests, issues such as the evolution of target pest resistance and outbreaks of non-target secondary pests have gradually emerged with the long-term cultivation of *B. thuringiensis* cotton (Lu et al., 2010; Heckel, 2012). There is therefore a pressing need to develop new strategies to address insect pest outbreaks.

Over millions of years, the selective pressure exerted by herbivorous insects has led to the evolution of effective defense systems in plants (Erb and Reymond, 2019). Plants respond to herbivorous insect attacks by initiating early signaling events, including depolarization of plasma transmembrane potential ( $V_m$ ), increases in cytoplasmic  $Ca^{2+}$ , generation of reactive oxygen species, and activation of mitogen-activated protein kinases. These pathways play central and conserved roles in enhancing broad-spectrum insect resistance in plants (Howe and Jander, 2008; Erb et al., 2012). Following the influx of  $Ca^{2+}$ ,  $Ca^{2+}$  sensors decode temporal and spatial signal transmission patterns to regulate metabolism and gene expression (Sanders et al., 2002). Typical  $Ca^{2+}$  sensors include calmodulin, calmodulin-like proteins, calcineurin B-like proteins, and calcium-dependent protein kinases (CDPKs). Among these, CDPK is the only sensor that combines sensing activity through a EF-hand structure with response activity through a protein kinase structure (Yip Delormel and Boudsocq, 2019). CDPK comprises four domains: the N-terminal variable domain, the Ser/Thr kinase domain, the inhibitory-junction domain, and the calmodulin-like domain (including an EF-hand calcium-binding site) (Batistic and Kudla, 2012). Its distinctive structure enables it to function concurrently as a  $Ca^{2+}$  receptor and an effector (Zuo et al., 2013). This specificity has generated particular research interest.

As an important class of Ser/Thr protein kinase genes, CDPKs form a large multigene family that is widely distributed in plants, green algae, protozoa, and oomycetes (Valmonte et al., 2014). CDPKs can be expressed across multiple tissues, including roots, stems, leaves, flowers, fruits, and seeds (Romeis et al., 2001; Ye et al., 2009). They can also localize to various cellular compartments, including the cytoplasm, nucleus, vacuolar membrane, endoplasmic reticulum, mitochondria, chloroplasts, and peroxisomes (Simeunovic et al., 2016). The wide distribution of CDPKs in plant tissues and multiple organelles indicates that they may have important functional roles in various biological processes of plants. For example, CDPKs play a significant role in the plant signal-transduction network in response to attack by herbivorous insects. In *Arabidopsis*, *AtCPK3/13* regulate the transcript level of *PDF1.2* by phosphorylating HsFB2a, thereby enhancing resistance against *Spodoptera littoralis* (Kanchiswamy et al., 2010). Simultaneous silencing of *NaCPK4* and *NaCPK5* results in significant accumulation of jasmonic acid (JA) in *Nicotiana attenuata*, enhancing its resistance against *Manduca sexta* (Yang et al., 2012). Knockout of *GmCPK38*, a soybean homolog of *NaCPK4/5*, alters numerous resistance-related phosphorylated proteins, genes, and metabolites, thereby enhancing soybean resistance to the common cutworm (Li et al., 2022). In addition, *GmCPK17* has been shown to positively regulate the resistance of soybean hairy roots to the common cutworm (Wang et al.,

## Mutant library of the cotton CDPK gene family

2022). Various CDPKs from different plant species thus mediate responses to herbivorous insects by regulating gene expression or modulating hormone biosynthesis, exerting positive or negative effects.

The emergence of genome-editing tools has provided a tremendous opportunity for deciphering gene function, and the development of genome sequencing has accelerated the use of gene-editing tools (Pan et al., 2023). Because of its simple design, CRISPR-Cas9 can target the majority of DNA sequence fragments in the genome, enabling the rapid construction of large-scale knockout mutant libraries for forward genetic screening. Therefore, high-throughput loss-of-function screening of mutant libraries constructed using the CRISPR-Cas9 gene-editing system has been rapidly applied to plants (Shalem et al., 2014; Wang et al., 2018; Gaillochet et al., 2021). Lu et al. developed a pooled method for induction of genome-wide gene mutations in rice using a single-guide RNA (sgRNA) library (Lu et al., 2017). They constructed a pooled library of 88 541 sgRNAs targeting 34 234 genes, ultimately producing 91 004 T0 plants. Using CRISPR-Cas9, they performed comprehensive functional screening across the entire rice genome, producing a valuable resource for rice research and breeding. Small-scale functional genomic screening based on CRISPR mutant libraries has also been performed in tomato (*Solanum lycopersicum*), cotton (*Gossypium hirsutum*), soybean (*Glycine max*), and maize (*Zea mays*) through construction of libraries containing 54, 512, 70, and 1368 sgRNAs, respectively (Jacobs et al., 2017; Bai et al., 2020; Liu et al., 2020; Sun et al., 2024). These groundbreaking studies have independently demonstrated the utility of pooled CRISPR screening in plants.

CDPKs play a key role in plant defense against herbivorous insects as early signal-transduction genes (Romeis and Herde, 2014). We therefore developed a new approach to screen insect-resistance genes from the CDPK gene family in upland cotton using a CRISPR-Cas9 mutant library. First, through comprehensive analysis of the *GhCPK* gene family, we identified 82 *GhCPKs* in the upland cotton genome and predicted that this gene family was involved in multiple biological processes in cotton, laying the foundation for functional analysis of the *GhCPK* family. Next, we constructed a CRISPR-Cas9 mutant library for the *GhCPK* gene family. Through field phenotyping and insect-resistance experiments, we screened the insect-resistant *cpk33/74* cotton lines from the mutant library, and we performed preliminary investigations of the insect-resistance mechanisms of the screened candidate genes, *GhCPK33* and *GhCPK74*. This study provides valuable insights into the role of CDPKs in plant-insect interactions. In addition, the numerous mutants developed here provide a valuable genetic resource for functional study of the CDPKs and creation of pest-resistant cotton germplasms.

## RESULTS

### Comprehensive analysis of the CDPK gene family in upland cotton

A total of 82 *GhCPK* genes were identified in the upland cotton genome, and genomic information and physicochemical properties of all *GhCPK* members were summarized, including gene names, chromosomal locations, amino acid residues (which

varied from 331 to 907), relative molecular weights (37.40 to 101.03 kDa), and isoelectric points (4.68 to 9.48) (Supplemental Table 1). N-myristoylation and S-palmitoylation are important post-translational protein modifications; among the 82 predicted *GhCPKs*, 35 had N-terminal myristoylation sites, and 75 had at least one palmitoylation site. Predictions of transmembrane domains, signal peptides, and EF-hand structures revealed that all *GhCPK* proteins lack transmembrane domains, most lack signal peptides, and 78 have four EF-hands, whereas four have three EF-hands (Supplemental Table 1).

To examine the evolutionary relationships among the *CDPK* genes, we constructed an unrooted phylogenetic tree by aligning the full-length protein sequences of 34 *AtCPKs*, 31 *OsCPKs*, and 82 *GhCPKs* (Supplemental Figure 1). All *CDPK* proteins from the three species clustered into four distinct subgroups (groups 1–4), implying that these subgroups existed prior to the differentiation of monocots and dicots. We used the MEME website to predict 10 conserved motifs in the *GhCPK* proteins (Supplemental Figure 2). Motifs 1, 3, and 5 were present in all *GhCPK* proteins except *GhCPK45* and *GhCPK50*. Motif 4 was present in all proteins except *GhCPK50* and *GhCPK82*. There were also differences in protein motifs among different subgroups; for example, motif 7 was unique to group 3, and all members of group 4 lacked motif 6. *GhCPKs* from the same subgroup possessed similar numbers, types, and spatial distributions of motifs, supporting their close evolutionary relationships. Differences in motifs among different subgroups imply that *CDPKs* have diverse functions in upland cotton. An analysis of gene structure is shown in Supplemental Figure 2; despite variation in exon numbers (7 to 16) among family members, *GhCPKs* from the same subgroup exhibited very similar exon–intron structures. Most members of group 1 had seven exons, and all members of group 4 had 12 exons. Conservation of these gene structures among members of each subgroup lends support to their close evolutionary relationships.

Collinearity analysis of the *GhCPKs* was performed with MCScanX and Circos software to investigate their mechanism of amplification (Supplemental Figure 3). A total of 128 collinear gene pairs were identified, each composed of two genes located on distinct chromosomes; because these pairs were not physically adjacent, segmental duplication appears to have been the main amplification mechanism for the *GhCPK* gene family. Collinearity analyses of the *G. hirsutum GhCPKs* with *CPKs* of *Arabidopsis thaliana*, *Oryza sativa*, and *Gossypium raimondii* revealed 174 pairs of orthologous genes between *G. hirsutum* and *G. raimondii*, 84 pairs between *G. hirsutum* and *A. thaliana*, and only 13 pairs between *G. hirsutum* and *O. sativa* (Supplemental Figure 4). These results suggest a closer evolutionary relationship of *G. hirsutum* to other dicots. To examine the potential functions and regulatory mechanisms of the *GhCPK* family, we analyzed the *cis*-acting elements in the 2-kb promoter sequences of all *GhCPKs* (Supplemental Figure 5). A total of 29 elements were identified and classified into four categories based on their functions: elements related to plant hormones, plant growth and development, defense response, and light response. These results indicate that *CDPKs* may function in diverse biological processes, indirectly reflecting the importance of this gene family in upland cotton.

### *GhCPKs* respond to multiple stresses at the transcriptional level

Gene expression is closely related to gene function. To explore the potential roles of the *GhCPKs*, the expression patterns of the 82 *GhCPK* genes were analyzed in the context of their phylogenetic relationships (Figure 1A). Most *GhCPKs* were expressed in multiple tissues, although *GhCPK55* was specifically expressed in petals and *GhCPK64* was specifically expressed in stems. All *GhCPKs* in group 4 showed relatively high expression in all tissues (Figure 1B). Expression of the cotton *GhCPKs* under four abiotic stress conditions (heat, salt, cold, and drought) was also analyzed (Figure 1C). A total of 73% of the *GhCPKs* showed significantly decreased expression after 1 h of high-temperature treatment (38°C) compared with the control group. Most *GhCPKs* demonstrated continuous downregulation in response to low-temperature treatment (4°C), particularly after 12 h. We next analyzed expression of the *GhCPKs* in cotton leaves after exposure to the oral secretions (OS) of *Helicoverpa armigera* and *S. litura* (Figure 1D). At 10 and 30 min after treatment with *H. armigera* or *S. litura* OS, at least 73% of the *GhCPKs* showed upregulated expression, which peaked at 30 min after treatment, and all *GhCPKs* in group 4 showed marked upregulation at both time points. However, after 240 min of treatment, the induced differential gene expression was no longer evident. We also studied the expression of *GhCPKs* at different time points in two cotton cultivars (exhibiting either strong resistance [HR] or sensitivity [ZS] to whitefly) upon whitefly infection (Figure 1E). The differential expression of *GhCPKs* in cotton leaves was most pronounced after 48 h of whitefly infection. In the strongly resistant cultivar, 54% of *GhCPKs* were significantly induced.

In summary, *GhCPKs* are widely expressed in different tissues and show significant changes in expression under various external stresses. These findings imply that the *CDPK* gene family is involved in multiple biological processes during cotton's growth, development, and response to adverse environmental conditions, making it an important gene group for upland cotton.

### Construction of a mutant library for the upland cotton *CDPK* gene family

To better understand the functional roles of *GhCPKs* in cotton resistance to insects, we developed an insect-resistance screening method for the *GhCPKs* based on a CRISPR–Cas9 mutant library. First, we designed 246 sgRNAs targeting the *GhCPKs* (Supplemental Table 2); these sgRNAs were classified into two types (Supplemental Figure 6A). The first type was designed to target individual *GhCPKs*; in this case, two different sgRNAs were designed to target an exon in a specific *GhCPK* (Figure 2A). Because of possible functional redundancy among genes of allotetraploid cotton, we also designed a second type of sgRNA to target homologous *GhCPKs* in the A and D subgenomes. In this case, two sgRNAs were designed to target the exon region in a pair of homologous genes, simultaneously mutating the two homologous *GhCPKs* but not other genes (Figure 2B).

To rapidly and efficiently obtain a mutant library of the *GhCPKs*, we used a mutant library construction method based on primer mixing pools (Figure 2C). We designed 246 primers based on the sgRNA sequences and constructed a mixed vector library using six primer



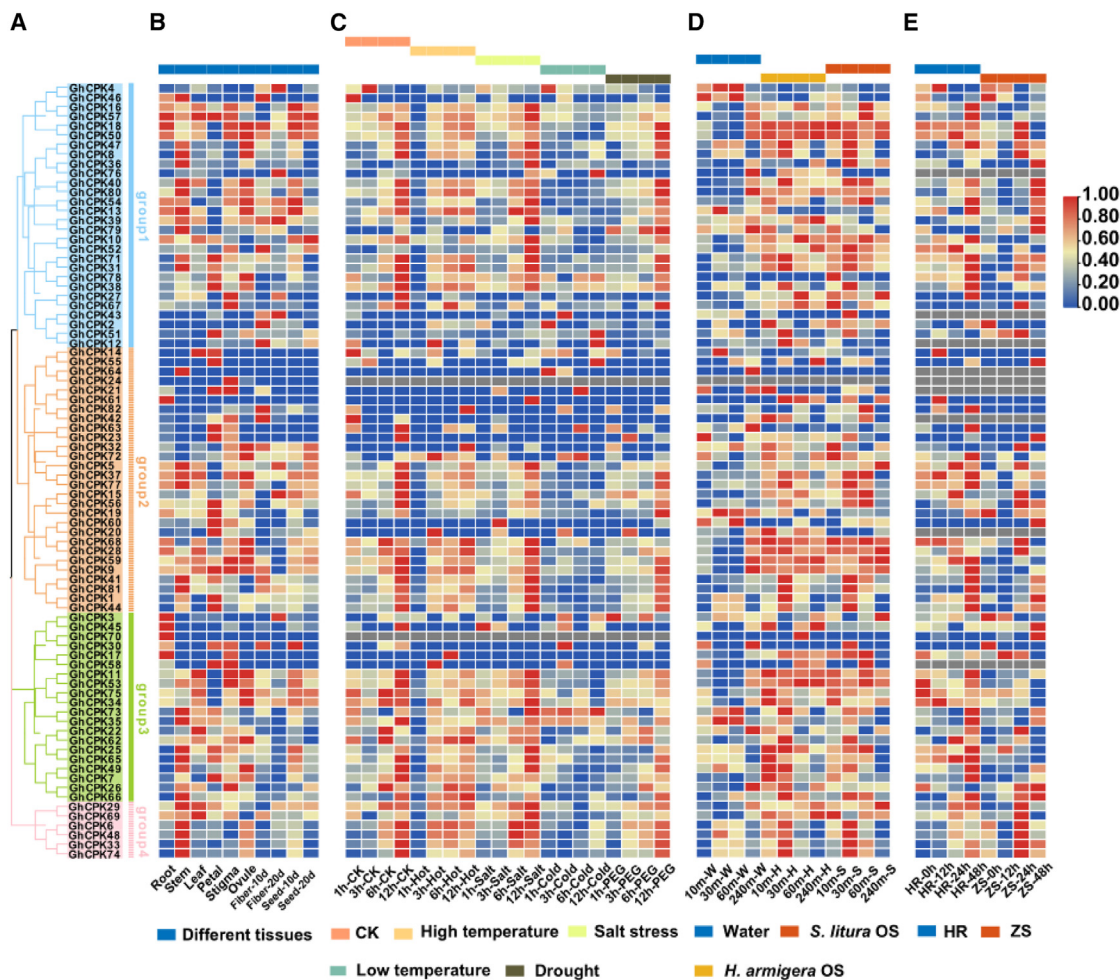

**Figure 1. Expression patterns of the *GhCPK* gene family in different tissues and under different stress conditions.**

(A) Phylogenetic tree of the *GhCPK* gene family. Different colors represent different subgroups.

(B) Expression profiles of *GhCPKs* in different tissues. From left to right are root, stem, leaf, petal, anther, stigma, ovule, fiber 10 days, fiber 20 days, seed 10 days, and seed 20 days.

(C) Expression profiles of *GhCPKs* induced by four types of abiotic stress: heat, cold, polyethylene glycol (PEG), and salt. The induction times for each type of stress were 1, 3, 6, and 12 h.

(D) Expression patterns of *GhCPK* genes after exposure to OS of *H. armigera* and *S. litura*. Four time points after processing were selected: 10, 30, 60, and 240 min.

(E) Expression patterns of the *GhCPK* gene family at different time points (0, 12, 24, and 48 h after infection) in two cotton cultivars (with strong resistance [HR] or sensitivity [ZS] to whitefly) infected by whitefly. In all the expression profiles mentioned above, red indicates increased expression, and blue indicates decreased expression.

mixing pools (Supplemental Table 3). The mixed-vector library constructed with primer mixing pool 1 was used to validate the feasibility of the method (Supplemental Table 4). By sequencing 100 collected monoclonal clones, we found that 36 sgRNAs were detected, with a coverage rate of 90% (Supplemental Figure 6B). After matching sgRNAs with genes, we found that the 36 sgRNAs could target all 20 genes, achieving a gene coverage of 100% (Supplemental Figure 6C). The majority of sgRNAs were detected two or three times (Supplemental Figure 6D). These results indicate that the method of constructing a mixed-vector library through primer mixing pools is feasible. The plasmids extracted from the mixed-vector library were transferred into *Agrobacterium tumefaciens* for stable transformation of cotton to produce genetically edited plants (Figure 2D), and we obtained 518 regenerated plants in the T0

generation. The method of constructing a CRISPR–Cas9 mutant library based on a primer mixing pool saves significant time and effort, enabling the rapid acquisition of a substantial number of mutant plants.

### Molecular detection for the *GhCPK* mutant library

Molecular detection was performed to study the gene status of each plant in the mutant library using the specific detection procedure shown in Figure 2E. Barcode high-throughput sequencing enabled us to quickly match the sgRNA sequences carried by each plant, accurately identifying the edited target gene(s). Among the 518 plants in the mutant library, 16.02% had no detected sgRNAs, 81.08% had one detected sgRNA, and 2.89% had two or three detected sgRNAs. Thus, only one (or a



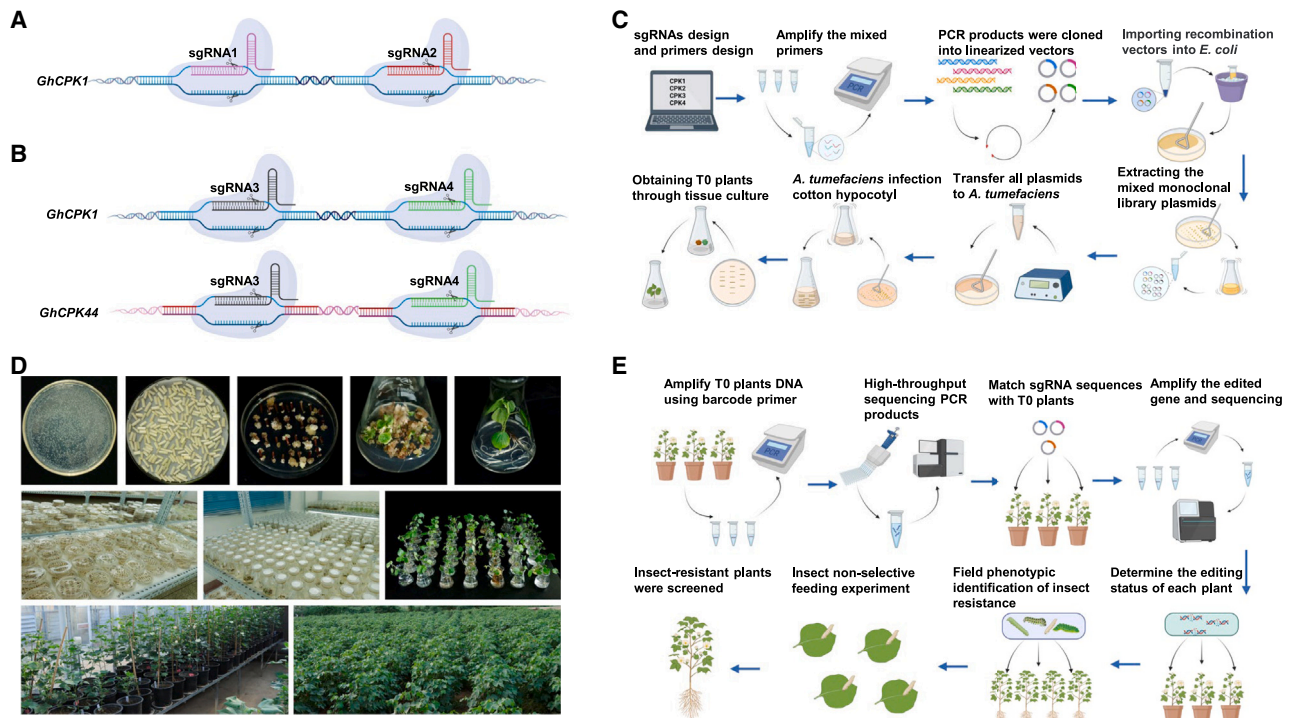

**Figure 2. Construction and detection procedures for the mutant library of the *GhCPK* gene family.**

- (A)** Schematic diagram of sgRNA design for knockout of a single *GhCPK*. SgRNA1 and sgRNA2 target *GhCPK1* individually and exclusively.
- (B)** Schematic diagram of sgRNA design for knockout of homologous *GhCPKs*. SgRNA3 and sgRNA4 simultaneously target both *GhCPK1* and *GhCPK44* and exclusively target only *GhCPK1* and *GhCPK44*.
- (C)** Procedure for construction of a mutant library for the *CDPK* gene family in upland cotton.
- (D)** The process of cotton genetic transformation.
- (E)** Molecular detection and insect-resistance screening procedure for the *GhCPK* mutant library.

pair of) *GhCPKs* had been edited in the majority of T0 plants (Supplemental Figure 7B). Only T0 plants carrying a single sgRNA were selected for further investigation. A total of 147 sgRNAs targeting 73 individual *GhCPKs* and 33 pairs of homologous *GhCPKs* were detected. The average target gene coverage was 86.18% (Figure 3A). In general, on the basis of sgRNA detection in the T0-generation plants, we successfully obtained gene-edited materials that met our needs for establishment of a CRISPR–Cas9 mutant library of the *CDPK* gene family in upland cotton. This result implied that construction of a large-scale mutant library using a mixed-vector library is feasible in upland cotton.

Next, primers were designed for each mutant plant based on the position of the sgRNA in the target gene (Supplemental Table 6). By analyzing the amplified sequences, the specific editing status of each gene could be determined. Because upland cotton is an allopolyploid, various types of fragments appear in the amplified sequences after editing. Traditional Sanger sequencing cannot meet the requirements for such complex amplifications. Therefore, high-throughput sequencing was performed. To verify the accuracy of this method, two randomly selected gene-edited plants were subjected to both high-throughput sequencing and Sanger sequencing (Supplemental Figure 7C). The results of the two sequencing methods were consistent, indicating that high-throughput sequencing is suitable for the detection of gene-edited cotton. By analyzing the high-throughput sequencing

results of 390 T0-generation plants, we found that 349 plants (89.49%) had undergone effective editing (editing efficiency  $\geq 10\%$ ) (Supplemental Figure 7D). Among them, 273 plants (78.22%) showed highly efficient editing (editing efficiency  $\geq 80\%$ ) (Figure 3B). Analysis of editing patterns in T0 plants revealed that the number of editing types varied from one to more than 10 for different plants (Figure 3C). *cpk37-3*, *cpk36/76-1*, and *cpk6/48-1* demonstrated one, two, and more than 10 editing types, respectively (Supplemental Figure 7E). The editing types included deletions, insertions, and substitutions. *cpk45-3* exhibited all three types of mutation simultaneously (Supplemental Figure 7F). Deletions (81.80%) accounted for the largest proportion in all editing types, followed by insertions (12.04%) (Figure 3D). The majority of deletions consisted of one to five missing bases (Figure 3E), whereas most insertion and substitution events consisted of one- or two-base insertions or substitutions (Figure 3F and 3G). These results demonstrate that the CRISPR–Cas9 system enables efficient editing of upland cotton through small-fragment insertions, deletions, and substitutions.

### Editing heritability analysis of gene-edited materials in the *GhCPK* mutant library

To determine whether the edited genes could be stably inherited in T1 offspring, 50 gene-edited plants from the T0 generation were randomly selected for genetic analysis. Three plants from

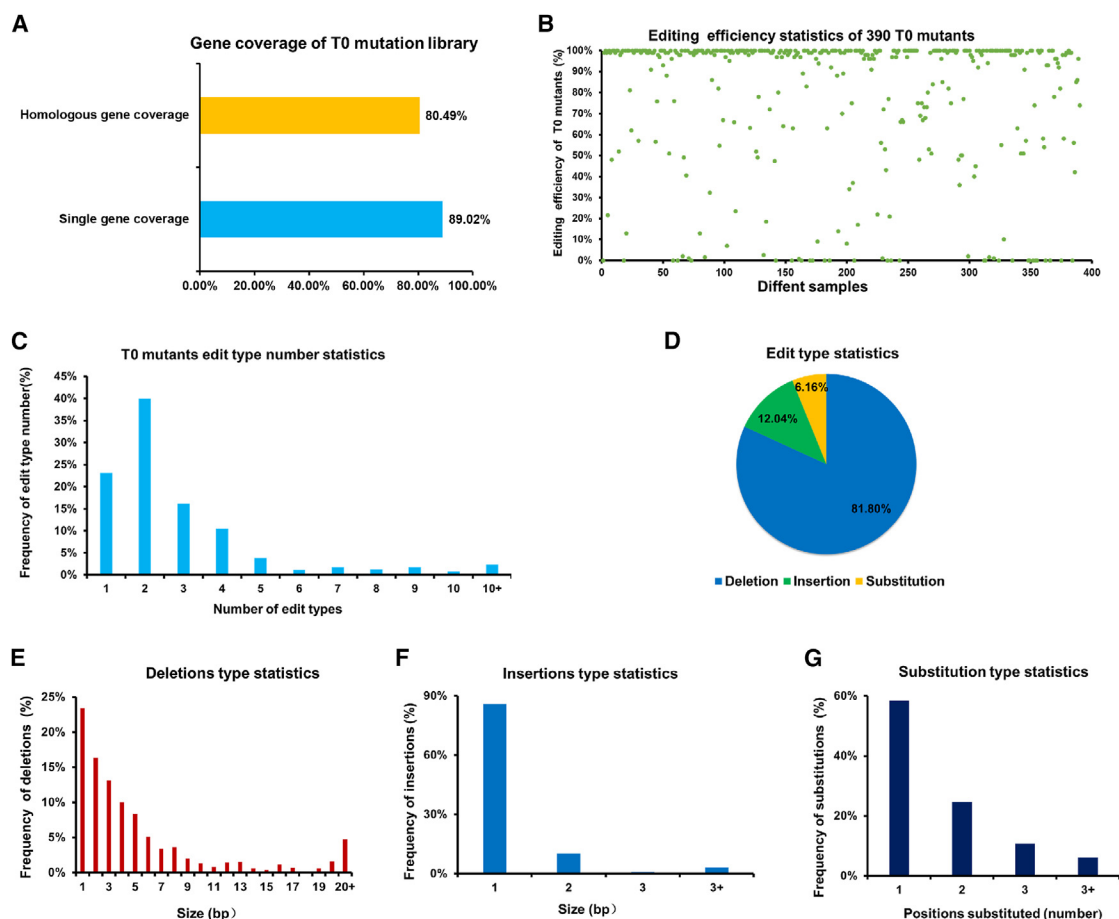

**Figure 3. Molecular detection results for T0-generation plants of the *GhCPK* mutant library.**

**(A)** Gene coverage of T0-generation plants from the *GhCPK* mutant library. Yellow represents the coverage of homologous genes, and blue represents the coverage of individual genes.

**(B)** Editing efficiency of 390 T0-generation plants from the *GhCPK* mutant library. Different samples are represented by green dots.

**(C)** Types of edits in T0-generation plants of the *GhCPK* mutant library. “Edit type” refers to different types of mutated reads produced after genes have been edited by the Cas9 protein. The number of edit types varies for each plant, ranging from one to more than 10.

**(D)** Classification of edit types in T0-generation plants of the *GhCPK* mutant library. Blue represents base absence, green represents base insertion, and yellow represents base substitution.

**(E)** Base deletion statistics. The x axis represents the number of deleted bases, and the y axis represents the frequency.

**(F)** Base insertion statistics. The x axis represents the number of inserted bases, and the y axis represents the frequency.

**(G)** Base substitution statistics. The x axis represents the number of substituted bases, and the y axis represents the frequency.

the progenies of each line were randomly chosen for high-throughput sequencing, and editing heritability analysis was performed by comparing their gene-editing types and editing efficiencies with those of the parental plants. If all the gene-editing types found in the T1 plants could be traced back to the parental plants, they were considered to be inherited from the parental generation. Among 150 T1 plants, 123 plants (82%) had gene-editing types that were completely inherited from the parental generation, 24 plants (16%) contained new gene-editing types, and three plants (2%) had not undergone gene editing (Supplemental Figure 8A and 8C). In terms of gene-editing efficiency, 101 plants (67.33%) in the T1 generation inherited 100% editing efficiency from the parental generation. Thirty-one plants (20.67%) had higher gene-editing efficiency than the parental generation, and 18 plants (12%) had lower gene-editing efficiency (Supplemental Figure 8B). These results indicate that most T1 plants inherit the parental editing patterns, but

the genetic rules are relatively complicated. For instance, T1-*cpk53-1-2* completely inherited the editing type and efficiency of its T0 parent; T0-*cpk64-2* had an editing efficiency of only 2.91% in the T0 generation, but the offspring showed an inheritance efficiency of 100% (Supplemental Figure 8D).

### Screening of insect-resistant materials from the *GhCPK* mutant library

To quickly screen for insect-resistant *GhCPK* mutants, we measured the damage caused by chewing pests on 243 cotton lines (involving editing of 62 independent *GhCPKs* and 28 pairs of homologous *GhCPKs*) grown in the field in two consecutive years and performed no-choice feeding experiments on all cotton lines using *S. littoralis* larvae (Figure 4A and 4B). Based on the damage caused by chewing pests to cotton lines in the field, combined with the results of the no-choice feeding experiment with *S. littoralis*

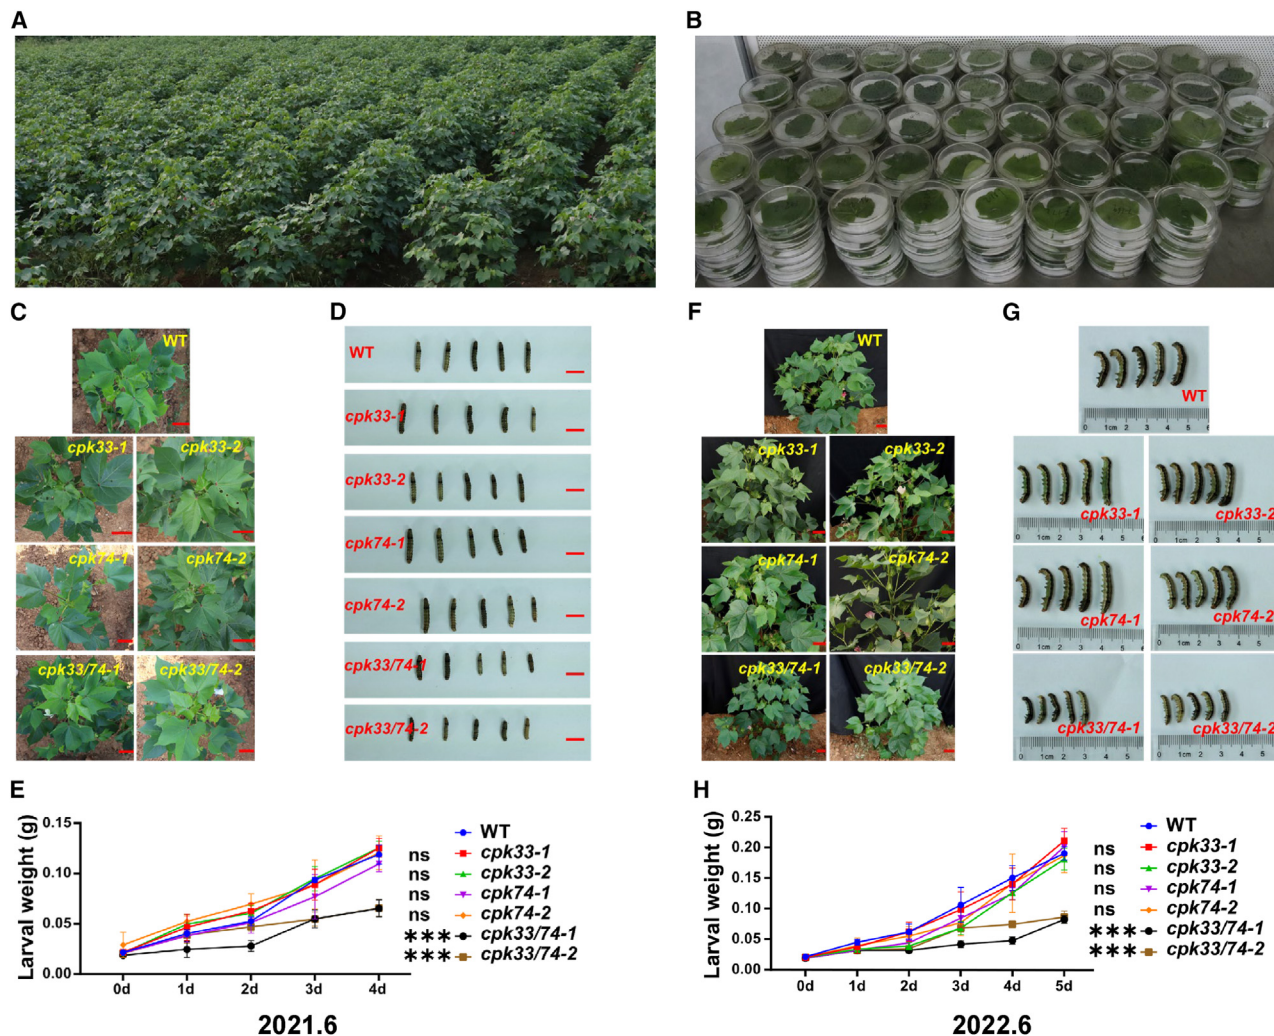

**Figure 4. Screening for materials that are resistant or sensitive to chewing pests in the *GhCPK* mutant library.**

(A) Field phenotyping for insect resistance in materials from the *GhCPK* mutant library.  
 (B) Non-selective feeding experiment with *S. litura* larvae on leaves of materials from the *GhCPK* mutant library.  
 (C) Field phenotyping for insect resistance of T1-generation *cpk33*, *cpk74*, and *cpk33/74* plants. The red line represents 5 cm.  
 (D) Comparison of body sizes of *S. litura* larvae after 4 days of continuous non-selective feeding on leaves of T1-generation *cpk33*, *cpk74*, and *cpk33/74* plants. The red line represents 1 cm.  
 (E) Average weight changes in *S. litura* larvae after 4 days of continuous feeding on leaves of T1-generation *cpk33*, *cpk74*, and *cpk33/74* plants.  
 (F) Field phenotyping for insect resistance of T2-generation *cpk33*, *cpk74*, and *cpk33/74* plants. The red line represents 5 cm.  
 (G) Comparison of the body sizes of *S. litura* larvae after 5 days of continuous non-selective feeding on leaves of T2-generation *cpk33*, *cpk74*, and *cpk33/74* plants.  
 (H) Average weight changes in *S. litura* larvae after 5 days of continuous feeding on leaves of T2-generation *cpk33*, *cpk74*, and *cpk33/74* plants. Means  $\pm$  SE ( $n = 12$ ). Statistical analyses were performed using Student's *t*-test. \*\*\* $p < 0.001$ .

larvae, this serves as a reference standard. Mutant lines whose field pest-resistance phenotypes were consistent with the results of the non-selective feeding experiment were selected for pest resistance evaluation (Supplemental Figure 9A and 9B). We also required that the insect-resistance phenotypes of mutant lines could be replicated across different lines with the same gene knockout. Six stable insect-resistance genes and eight stable susceptibility genes were identified (Table 1). In particular, the *cpk33/74* cotton lines with simultaneous knockout of the homologous genes *GhCPK33* and *GhCPK74* showed the most significant insect-resistance phenotype. Plants of *cpk33/74* showed almost no trace of chewing-insect damage in the field

evaluation (Figure 4C and 4F), and larvae that fed on *cpk33/74* had significantly lower weights than controls in a selective feeding assay. However, cotton plants with only *GhCPK33* (*cpk33*) or only *GhCPK74* (*cpk74*) knockout did not exhibit insect resistance (Figure 4D, 4E, 4G, and 4H).

**Overexpression of *GhCPK33* and *GhCPK74* reduces cotton defense against *S. litura* larvae**

To investigate the role of *GhCPK33* and *GhCPK74* in the interaction between cotton and herbivorous insects, we separately constructed overexpression vectors for *GhCPK33* and *GhCPK74*



| Mutant line     | Mutated gene ID             | Chewing pest resistance | Average editing efficiency |
|-----------------|-----------------------------|-------------------------|----------------------------|
| <i>cpk1</i>     | Gh_A01G0621                 | ns                      | 23.76%                     |
| <i>cpk6</i>     | Gh_A02G1635                 | +                       | 100.00%                    |
| <i>cpk15</i>    | Gh_A05G1571                 | +                       | 100.00%                    |
| <i>cpk16</i>    | Gh_A05G2355                 | ns                      | 99.08%                     |
| <i>cpk18</i>    | Gh_A05G3246                 | ns                      | 78.81%                     |
| <i>cpk24</i>    | Gh_A09G1033                 | — — —                   | 93.88%                     |
| <i>cpk26</i>    | Gh_A09G1157                 | ns                      | 100.00%                    |
| <i>cpk27</i>    | Gh_A09G1248                 | ns                      | 100.00%                    |
| <i>cpk29</i>    | Gh_A10G0886                 | ns                      | 100.00%                    |
| <i>cpk33</i>    | Gh_A11G1615                 | ns                      | 100.00%                    |
| <i>cpk37</i>    | Gh_A12G2686                 | —                       | 100.00%                    |
| <i>cpk39</i>    | Gh_A13G0563                 | —                       | 76.02%                     |
| <i>cpk40</i>    | Gh_A13G0566                 | ns                      | 100.00%                    |
| <i>cpk45</i>    | Gh_D02G0183                 | — —                     | 70.21%                     |
| <i>cpk46</i>    | Gh_D02G0663                 | ns                      | 99.28%                     |
| <i>cpk47</i>    | Gh_D02G1973                 | ns                      | 100.00%                    |
| <i>cpk48</i>    | Gh_D03G0087                 | ns                      | 100.00%                    |
| <i>cpk51</i>    | Gh_D04G0895                 | ns                      | 100.00%                    |
| <i>cpk52</i>    | Gh_D04G0900                 | ns                      | 99.69%                     |
| <i>cpk53</i>    | Gh_D04G1271                 | ns                      | 100.00%                    |
| <i>cpk61</i>    | Gh_D07G1198                 | — — —                   | 100.00%                    |
| <i>cpk63</i>    | Gh_D08G0142                 | ns                      | 100.00%                    |
| <i>cpk64</i>    | Gh_D09G1054                 | —                       | 100.00%                    |
| <i>cpk67</i>    | Gh_D09G1249                 | ns                      | 27.64%                     |
| <i>cpk71</i>    | Gh_D10G2029                 | — —                     | 100.00%                    |
| <i>cpk74</i>    | Gh_D11G1774                 | ns                      | 100.00%                    |
| <i>cpk75</i>    | Gh_D11G3329                 | ns                      | 100.00%                    |
| <i>cpk76</i>    | Gh_D12G0121                 | ns                      | 100.00%                    |
| <i>cpk77</i>    | Gh_D12G2743                 | ns                      | 100.00%                    |
| <i>cpk79</i>    | Gh_D13G0560                 | +                       | 99.78%                     |
| <i>cpk80</i>    | Gh_D13G0561                 | ns                      | 96.52%                     |
| <i>cpk6/48</i>  | Gh_A02G1635 and Gh_D03G0087 | +                       | 100.00%                    |
| <i>cpk8/47</i>  | Gh_A03G1505 and Gh_D02G1973 | ns                      | 100.00%                    |
| <i>cpk10/52</i> | Gh_A04G0467 and Gh_D04G0900 | ns                      | 100.00%                    |
| <i>cpk13/54</i> | Gh_A04G1429 and Gh_D04G1486 | +++                     | 100.00%                    |
| <i>cpk20/60</i> | Gh_A06G1772 and Gh_D06G2206 | ns                      | 98.45%                     |
| <i>cpk21/61</i> | Gh_A07G1099 and Gh_D07G1198 | ns                      | 100.00%                    |
| <i>cpk29/69</i> | Gh_A10G0886 and Gh_D10G0863 | ns                      | 99.54%                     |
| <i>cpk30/70</i> | Gh_A10G1195 and Gh_D10G1303 | ns                      | 100.00%                    |
| <i>cpk33/74</i> | Gh_A11G1615 and Gh_D11G1774 | +++                     | 100.00%                    |
| <i>cpk36/76</i> | Gh_A12G0109 and Gh_D12G0121 | ns                      | 100.00%                    |
| <i>cpk37/77</i> | Gh_A12G2686 and Gh_D12G2743 | —                       | 58.89%                     |

**Table 1. Evaluation of insect resistance in plants of the *GhCPK* mutant library for defense against chewing pests.**

Note: “+” indicates insect resistance, “—” indicates insect susceptibility, and “ns” indicates no difference.

(Supplemental Figure 10A and 10B). Through *Agrobacterium*-mediated transformation, we created independent transgenic plants overexpressing *GhCPK33* (*CPK33-OE*) and *GhCPK74* (*CPK74-OE*). On the basis of *GhCPK33* and *GhCPK74* expression levels, four independent lines (*CPK33-OE1*, *CPK33-OE2*, *CPK74-OE1*, and *CPK74-OE3*) were selected for further study from 22 *CPK33-OE* and 14 *CPK74-OE* lines (Supplemental Figure 10C and 10D). The T2 generation of mutants (*cpk33/74-1* and *cpk33/74-2*) and the T1 generation of overexpression plants (*CPK33-OE1*, *CPK33-OE2*, *CPK74-OE1*, and *CPK74-OE3*), as well as the wild type (WT), were sown simultaneously. After 40 days, selective feeding and non-selective feeding experiments were performed on all materials using *S. litura* larvae. After 24 h of selective feeding by *S. litura* larvae, leaf consumption was significantly higher for the *CPK33-OE* and *CPK74-OE* lines than the WT but significantly lower for the *cpk33/74* lines (Figure 5A and 5B). In the non-selective experiment, after feeding for 5 days, the weight of the *S. litura* larvae fed with *CPK33-OE* and *CPK74-OE* leaves was significantly higher than that of the larvae fed with WT leaves, whereas the weight of larvae fed with *cpk33/74* leaves was significantly lower (Figure 5C and 5D). *CPK33-OE* and *CPK74-OE* thus exhibited significantly reduced defense against *S. litura*, whereas *cpk33/74* plants showed significantly enhanced defense. We hypothesize that *GhCPK33* and *GhCPK74* play a negative regulatory role in cotton defense against *S. litura* larvae.

### Evolution and domestication analysis of the *GhCPK33* and *GhCPK74* loci

Resequencing data from 1623 cotton germplasm resources from previous studies was used to investigate the evolution and domestication of the *GhCPK33* and *GhCPK74* loci (Li et al., 2021). The 1623 germplasms included 256 *G. hirsutum* landraces (Ghlandraces), which are naturally insect-resistant varieties; 438 elite *G. hirsutum* cultivars from the USA and other countries (GhImpUSO); and 929 elite *G. hirsutum* cultivars from China (GhImpCHN). The results revealed significant single-nucleotide polymorphism (SNP) variation around the *GhCPK33* and *GhCPK74* loci (20 kb upstream and downstream) in Ghlandraces (Figure 5E). To further investigate the evolution of *GhCPK33* and *GhCPK74* in the Ghlandraces population, we constructed genotype maps for the *GhCPK33* and *GhCPK74* loci (Supplemental Figure 11A and 11B). Haplotype analysis of the *GhCPK33* locus in the Ghlandraces population revealed the presence of four SNPs, two of which were located in introns and two in the 3' UTR. The major SNP variants were observed at positions 24 527 886 (A to G) and 24 531 788 (G to A), accounting for 24.22% (Supplemental Figure 11A). Haplotype analysis of the *GhCPK74* locus in the Ghlandraces population revealed SNPs at nine positions: three in exons, five in introns, and one in the 5' UTR. The main SNP variants were observed at positions 20 320 372 (A to G) and 20 319 885 (A to T), accounting for 6.64% (Supplemental Figure 11B). In summary, we speculate that *GhCPK33* and *GhCPK74* may have influenced the insect resistance of upland cotton during evolution and domestication processes.

### *GhCPK33* and *GhCPK74* negatively regulate $\text{Ca}^{2+}$ influx induced by *S. litura* OS

Elevation of cytoplasmic  $\text{Ca}^{2+}$  is an important early signal-transduction step in plants for perceiving attacks from herbivorous

insects and initiating defense responses (Howe and Jander, 2008). Here, we used non-invasive micro-test technology (NMT) to investigate dynamic changes in cytoplasmic  $\text{Ca}^{2+}$  flux in cotton leaf mesophyll cells induced by the OS of *S. litura* and to explore the involvement of *GhCPK33* and *GhCPK74* in mediating post-ingestion  $\text{Ca}^{2+}$  influx by the insects (Figure 5F). In the untreated state,  $\text{Ca}^{2+}$  in the leaf mesophyll cells of WT, *cpk33/74*, *CPK33-OE*, and *CPK74-OE* showed an efflux state, with no significant differences in flow rate. The average flow rate within 5 min ranged from 40 to 100 pmol  $\text{cm}^{-2} \text{s}^{-1}$ . After treatment with the OS of *S. litura*, the leaf mesophyll cells of *cpk33/74* exhibited a strong and rapid  $\text{Ca}^{2+}$  influx, with an average flow rate of 701 pmol  $\text{cm}^{-2} \text{s}^{-1}$  within 5 min. However, this ability was impaired in *CPK33-OE* and *CPK74-OE* compared with the WT. The influx rate of  $\text{Ca}^{2+}$  was slowed in these lines, with average flow rates of only 52 and 104 pmol  $\text{cm}^{-2} \text{s}^{-1}$  within 5 min, respectively (Supplemental Figure 11C and 11D). These results indicate that *GhCPK33* and *GhCPK74* negatively regulate the  $\text{Ca}^{2+}$  influx induced by *S. litura*.

### *GhCPK33* and *GhCPK74* negatively regulate JA synthesis induced by OS of *S. litura*

JA is an important hormone related to plant insect resistance. To investigate the underlying mechanism of *ChCPK33/GhCPK74*-regulated insect resistance, we measured JA content in insect-induced cotton leaves. We cultured T2 generation plants of *cpk33*, *cpk74*, *cpk33/74*, *CPK33-OE*, *CPK74-OE*, and WT in the same environment. After 6 weeks, the leaf surfaces of all materials were scratched using a pattern wheel, and the injured leaf area was then coated with OS of *S. litura* (H + S) to simulate feeding by this insect. Water was applied to the injured area of the leaf (H + W) to simulate mechanical damage, and no treatment was applied to control leaves (N). After a 30-min treatment, JA content was measured in the leaves of all materials. Both H + W and H + S treatments induced JA production in cotton leaves. However, compared with WT leaves, *cpk33/74* leaves showed a more significant increase in JA content after H + S treatment. By contrast, the JA content of *CPK33-OE* and *CPK74-OE* leaves was lower than that of WT leaves after H + S treatment (Figure 5G). These results suggest that *GhCPK33* and *GhCPK74* can negatively regulate the JA synthesis induced by *S. litura* OS. Therefore, the *cpk33/74* material, with simultaneous knockout of *GhCPK33* and *GhCPK74*, shows enhanced resistance against insects. However, JA content in *cpk33* and *cpk74* leaves did not differ significantly from that of WT leaves after H + S treatment. Thus, we hypothesize that *GhCPK33* and *GhCPK74* are functionally redundant in the negative regulation of JA synthesis.

### *GhCPK33* and *GhCPK74* interact with GhSAMS1 and GhSAMS2

The subcellular localization of *GhCPK33* and *GhCPK74* was examined by fusing their full-length coding sequences (CDSs) with N-terminal green fluorescent protein (GFP) and transiently expressing the fusion proteins in tobacco epidermal cells. Fluorescence was observed in both the cell membrane and the nucleus using confocal microscopy (Figure 6A). Yeast two-hybrid (Y2H) assays were then performed to screen interacting proteins of *GhCPK33* or *GhCPK74*. The two S-adenosylmethionine synthases (SAMSs) GhSAMS1 and GhSAMS2 were identified

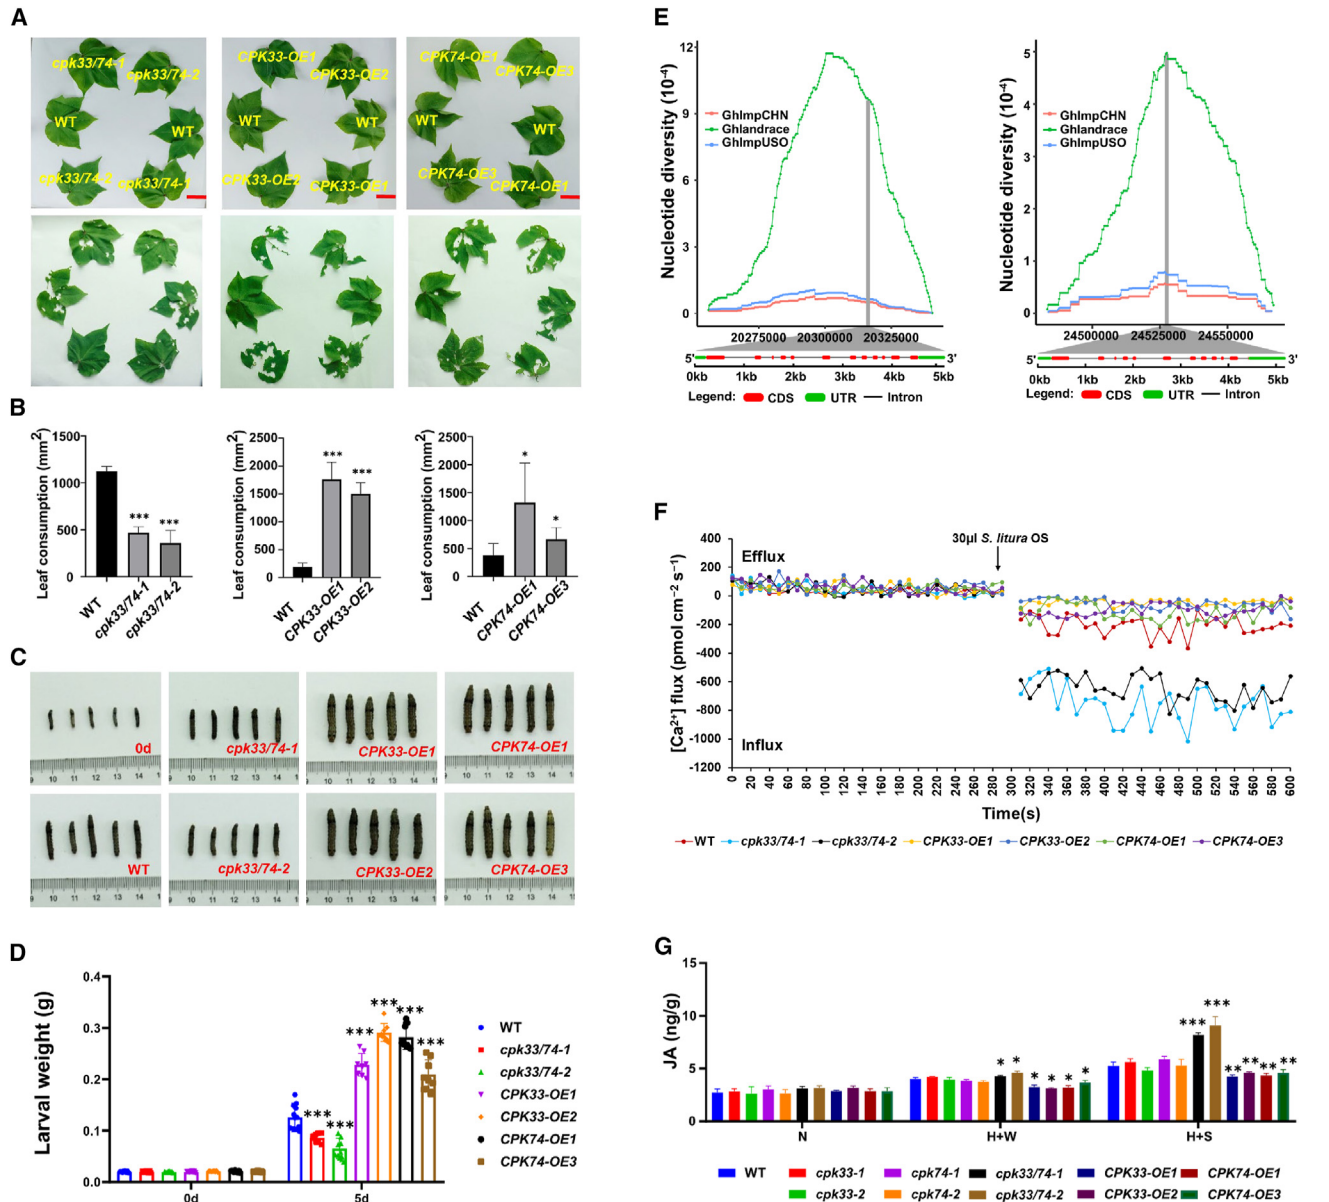

**Figure 5. Evidence for the involvement of GhCPK33 and GhCPK74 in pest defense of upland cotton.**

**(A)** Choice feeding assay with *S. litura* larvae and *cpk33/74*, *CPK33-OE*, *CPK74-OE*, and WT plants. The third-instar *S. litura* larvae were pre-starved for 6 h and photographed at 0 and 24 h. The red line represents 3 cm.

**(B)** Leaf consumption in the choice feeding assay with *S. litura*. Means  $\pm$  SE ( $n = 6$ ).

**(C)** Comparison of the body sizes of *S. litura* larvae after 5 days of continuous non-selective feeding on leaves of *cpk33/74*, *CPK33-OE*, *CPK74-OE*, and WT plants.

**(D)** Average body weight changes of *S. litura* larvae after 5 days of continuous feeding on leaves of *cpk33/74*, *CPK33-OE*, *CPK74-OE*, and WT plants. Means  $\pm$  SE ( $n = 12$ ).

**(E)** Nucleotide diversity of the Ghlandraces, GhImpUSO, and GhImpCHN populations. The x axis represents the 20 kb upstream and downstream of *GhCPK33* or *GhCPK74*, and the y axis represents nucleotide diversity.

**(F)** NMT was used to detect dynamic changes in cytoplasmic  $Ca^{2+}$  flux in *cpk33/74*, *CPK33-OE*, *CPK74-OE*, and WT leaf mesophyll cells before and after OS induction.

**(G)** JA content of *cpk33/74*, *cpk33*, *cpk74*, *CPK33-OE*, *CPK74-OE*, and WT leaves. N, not treated; H + W, mechanical damage; H + S, *S. litura* feeding. Means  $\pm$  SE ( $n = 3$ ). Statistical analyses were performed using Student's *t*-test. \* $p < 0.05$ , \*\* $p < 0.01$ , \*\*\* $p < 0.001$ .

as interacting proteins of GhCPK33 and GhCPK74 (Figure 6B). SAMS is an important protein involved in multiple plant stress responses and is the only enzyme that catalyzes the synthesis of S-adenosyl methionine (Markham et al., 1983; He et al.,

2019). Bimolecular fluorescence complementation (BiFC) and luciferase complementation imaging (LCI) assays were performed to verify the protein interactions of the GhSAMS with the GhCPKs. Strong yellow fluorescent protein signals were



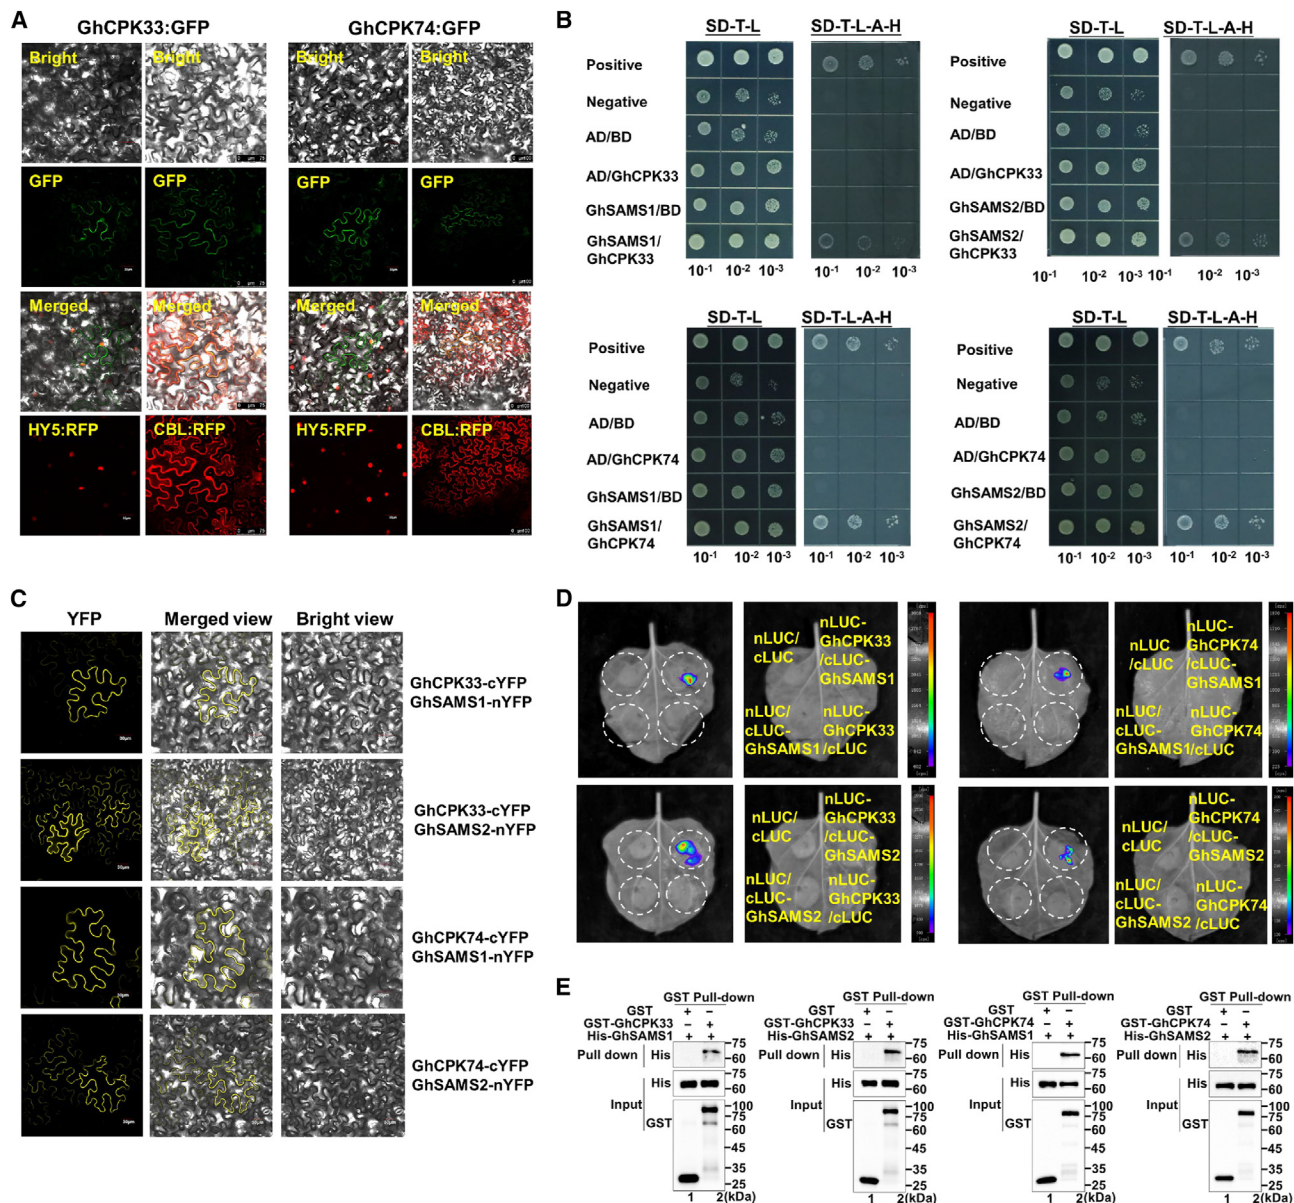

**Figure 6. GhCPK33 and GhCPK74 interact directly with GhSAMS1 and GhSAMS2.**

(A) Subcellular localization of GhCPK33:GFP protein and GhCPK74:GFP protein. GFP fluorescence was observed after transient expression of GhCPK33:GFP protein and GhCPK74:GFP protein in tobacco epidermal cells. Calceinurin B-Like (CBL) and HY5 were used as plasma membrane and nuclear markers, respectively.

(B) Y2H assay for interactions of GhCPK33 and GhCPK74 with GhSAMS1 and GhSAMS2. SD-T-L medium lacks Trp and Leu, and SD-T-L-H-A medium lacks Trp, Leu, His, and Ade.

(C) BiFC assay of the interaction of GhCPK33-cYFP and GhCPK74-cYFP with GhSAMS1-nYFP and GhSAMS2-nYFP in tobacco epidermal cells. Bars, 30  $\mu$ m.

(D) LCI analysis of the interaction of GhCPK33-nLUC and GhCPK74-nLUC with GhSAMS1-cLUC and GhSAMS2-cLUC in tobacco leaves.

(E) Pull-down assay verifying the interaction of GhCPK33 and GhCPK74 with GhSAMS1 and GhSAMS2.

observed on the membranes of tobacco cells co-expressing GhSAMS1 and GhCPK33, GhSAMS2 and GhCPK33, GhSAMS1 and GhCPK74, and GhSAMS2 and GhCPK74 (Figure 6C). In the LCI tests, interaction signals between the four pairs of proteins were also detected (Figure 6D). GhSAMS1, GhSAMS2, GhCPK33, and GhCPK74 proteins were expressed and purified in prokaryotic cells, and pull-down experiments were performed to validate their interactions (Figure 6E).

The results showed that GhSAMS1 and GhSAMS2 could interact with GhCPK33 and GhCPK74 *in vivo* and *in vitro*.

### Silencing *GhSAMS1* and *GhSAMS2* impairs cotton resistance to *S. litura* larvae

To investigate the relationship of GhCPK33 and GhCPK74 with GhSAMS1 and GhSAMS2, expression levels of *GhSAMS1* and

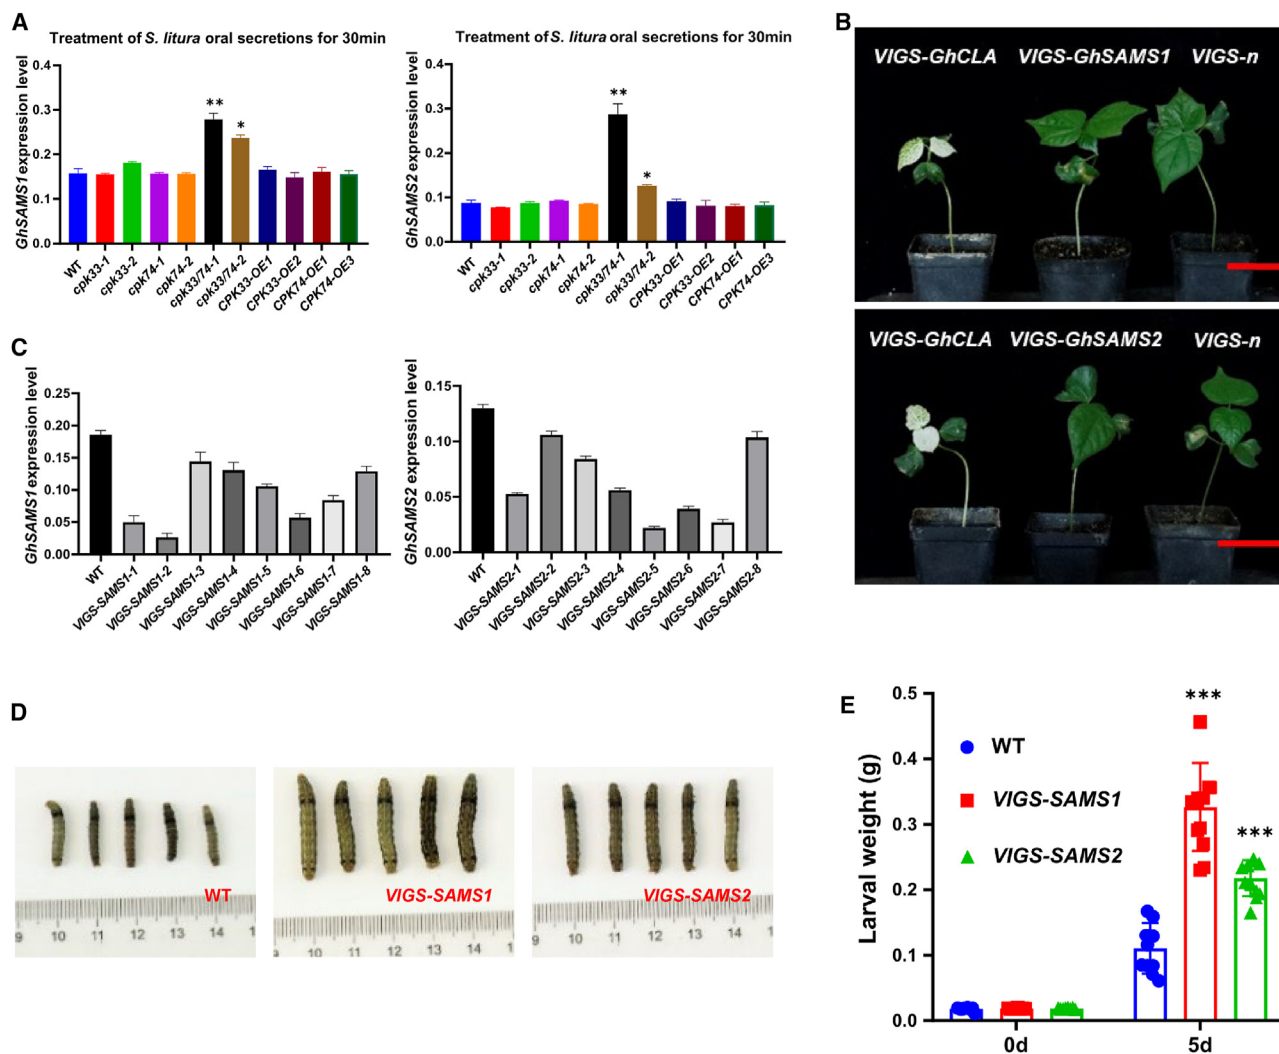

**Figure 7. Expression levels of *GhSAMS1* and *GhSAMS2* after H + S treatment and assessment of insect resistance.**

(A) qRT-PCR detection of *GhSAMS1* and *GhSAMS2* in *cpk33*, *cpk74*, *cpk33/74*, *CPK33-OE*, *CPK74-OE*, and WT materials after H + S treatment. *GhUB7* was used as the internal control. Means  $\pm$  SE ( $n = 3$ ).

(B) VIGS of *GhSAMS1* and *GhSAMS2*. VIGS-*GhCLA* was the positive control, and VIGS-*n* was the negative control. The red line represents 5 cm.

(C) Expression levels of *GhSAMS1* and *GhSAMS2* in leaves of VIGS-*GhSAMS1* and VIGS-*GhSAMS2* plants.

(D) Comparison of the body size of *S. litura* larvae after 5 days of non-selective feeding on WT, VIGS-*GhSAMS1*, and VIGS-*GhSAMS2* plants.

(E) Average weight changes of *S. litura* larvae after 5 days of continuous feeding on WT, VIGS-*GhSAMS1*, and VIGS-*GhSAMS2* leaves. Means  $\pm$  SE ( $n = 12$ ). Statistical analyses were performed using Student's *t*-test. \*\*\* $p < 0.001$ .

*GhSAMS2* were examined after 30 min of H + S treatment in *cpk33*, *cpk74*, *cpk33/74*, *CPK33-OE*, *CPK74-OE*, and WT materials. The expression levels of *GhSAMS1* and *GhSAMS2* were significantly increased in the *cpk33/74* leaves treated with H + S; however, there was no significant difference in *GhSAMS1* and *GhSAMS2* expression in *cpk33* and *cpk74* leaves treated with H + S compared with the WT (Figure 7A). To investigate the role of *GhSAMS1* and *GhSAMS2* in defense against insects, we performed virus-induced gene-silencing (VIGS) of *GhSAMS1* and *GhSAMS2*, resulting in VIGS-*GhSAMS1* and VIGS-*GhSAMS2* seedlings (Figure 7B and 7C). Their insect resistance was assessed through a no-choice feeding experiment using *S. litura* larvae. The results showed a significant increase in the weight of *S. litura* larvae fed with VIGS-*GhSAMS1* and VIGS-*GhSAMS2* leaves compared with the control group (Figure 7D

and 7E), suggesting that silencing of *GhSAMS1* and *GhSAMS2* can result in decreased resistance of upland cotton to *S. litura* larvae.

## DISCUSSION

The CDPK gene family has a long evolutionary history, dating back to the earliest land plants, such as ferns and mosses (Hamel et al., 2014). With the development of biotechnology, an increasing number of CDPKs have been identified in different species. The *A. thaliana*, *O. sativa*, *Cucumis sativus*, *Populus alba*, and *Cucumis melo* genomes harbor 34, 31, 19, 30, and 18 CDPK genes, respectively (Sanders et al., 2002; Ray et al., 2007; Zuo et al., 2013; Xu et al., 2015; Zhang et al., 2017). The release of upland cotton genome data has provided valuable information

for a comprehensive analysis of upland cotton *CDPKs*. As an allopolyploid, upland cotton originated from a polyploidization event approximately 1–2 million years ago, which combined the *Gossypium arboreum* A subgenome and the *G. raimondii* D subgenome (Wendel, 1989). An assembly of the cotton A and D genomes has been published, and the genome draft of upland cotton was released in 2015, followed by several updated versions, all focusing on TM-1 as the research subject (Wang et al., 2012; Li et al., 2014; Yang et al., 2019). To obtain more comprehensive results, we retrieved *CDPK* family members from two protein databases (NCBI and HAU) (Zhang et al., 2015; Wang et al., 2019b). Although there were some differences in alignment results between the two databases, such as the presence of *GhCPK63* in only the NCBI database, the majority of the results were consistent. A total of 82 *GhCPKs* were identified. *GhCPKs* were widely expressed in multiple tissues of cotton and were induced by various biotic and abiotic stresses (Figure 1), indicating that they participate in various plant biological processes in cotton. In particular, multiple *GhCPKs* exhibited significant differential expression induced by *H. armigera*, *S. litura*, and whitefly, indirectly confirming the feasibility of searching for insect-resistance genes among the *GhCPKs*. Identification and analysis of the *CDPK* gene family in upland cotton thus provide valuable information for subsequent research.

In this study, we screened for insect-resistance genes using a strategy based on a CRISPR–Cas9 mutant library. The entire study was based on a breakthrough in upland cotton regeneration technology and the development of the CRISPR–Cas9 system for upland cotton (Jin et al., 2006; Wang et al., 2018). In plant species that can be transformed and regenerated, the use of CRISPR for gene mutation to validate gene function is practicable (Bortesi and Fischer, 2015). However, if gene knockout for the 246 sgRNAs were performed by constructing 246 individual vectors for genetic transformation, this would be a labor-intensive and time-consuming process. By creating a mixed pool of sgRNAs, constructing a vector library, and performing *Agrobacterium*-mediated transformation, we demonstrated a new approach for the creation of a large mutant population (Liu et al., 2023). This method is efficient, as it avoids the construction of individual vectors and the performance of individual transformations. It requires only batch transformation of mixed *Agrobacteria* containing the plasmid library, thereby quickly generating the desired gene-edited plants. However, drawbacks of this method are also apparent. Because the sgRNA sequences carried by each transgenic plant are unknown, subsequent molecular detection of the T0-generation materials is relatively complex. First, it is necessary to detect the sgRNA sequences carried by each material, a process that can be simplified by barcode-based high-throughput sequencing. Through our statistical analysis, 147 target sites were detected, targeting 73 individual *GhCPKs* and 33 pairs of homologous *GhCPKs*. The average gene coverage was 86.18%. Although our sgRNA coverage was much lower (59.76%) than the nearly 100% sgRNA coverage reported in soybean and tomato (Jacobs et al., 2017; Bai et al., 2020), we designed two sgRNAs for each gene and each homologous gene pair, thus compensating for the low sgRNA coverage and ultimately achieving a gene coverage of at least 85%. Expanding the population size of the transformation groups is another possible approach for enhancing sgRNA

coverage. We also failed to rule out the potential influence of knocking out *GhCPKs* related to cotton regeneration, which would affect the total population of the *GhCPK* mutant library.

Through detection of gene editing in T0 plants of the *GhCPK* mutant library, we found that the CRISPR–Cas9 system in upland cotton was remarkably effective, with over 70% of plants exhibiting editing efficiencies >80%. Deletion was the predominant editing type in most plants, accounting for 81.80% of all edits, followed by insertion, which accounted for 12.04%. Through genetic analysis of the T0 and T1 generations, we observed that the heredity of the CRISPR–Cas9 gene edits was complex. Although most T1 plants inherited the editing pattern of their parents, a few produced new editing types owing to the presence of CRISPR–Cas9 expression cassettes. The presence of non-homozygous editing in the T0 generations further contributed to the complexity. When selecting T1 generations, we believe that individuals with a single editing type and without the CRISPR–Cas9 expression cassettes are more suitable for seed preservation.

A small number of T0 plants in the *GhCPK* mutant library exhibited unique phenotypes, such as yellow leaves and dwarf stature (Supplemental Figure 13), and most of these T0 plants were sterile. These plants were valid mutants in which a specific *GhCPK* had been edited. However, not all mutants of the corresponding *GhCPK* showed these phenotypes. We re-transformed CRISPR–Cas9 vectors into cotton to knock out the corresponding *GhCPKs* individually, and the unique phenotypes were not reproducible. We believe that these phenotypes were related to mutations caused by transfer-DNA insertion or the long-term tissue culture process and were not related to *GhCPKs*. To ensure the stability and accuracy of phenotypic identification, it is necessary to select at least two independent knockout lines in the T0 generation of each *GhCPK* for phenotypic screening.

We identified GhSAMS1 and GhSAMS2 as interacting proteins of GhCPK74 and GhCPK33 through BiFC, LCI, and pull-down assays. SAMS is widely involved in the regulation of stress response and growth/development across plant species. In *Arabidopsis*, AtSAMS3 is involved in pollen formation (Chen et al., 2016). In cucumber, CsSAMS is induced by salt stress and participates in related regulation (Zhu et al., 2021). In tobacco, overexpression of soybean *GmSAMS1* enhances resistance to *S. litura* (Fan et al., 2018). We examined the expression levels of *GhSAMS1* and *GhSAMS2* in cotton leaves induced by OS of *S. litura*. Both *GhSAMS1* and *GhSAMS2* were significantly upregulated in *cpk33/74* materials but showed no obvious changes in *cpk33* and *cpk74* compared with WT plants. We therefore hypothesize that *GhCPK74* and *GhCPK33* act redundantly in the negative regulation of *GhSAMS1* and *GhSAMS2* expression and in cotton resistance to insects. We next performed insect-resistance assays with *VIGS-GhSAMS1* and *VIGS-GhSAMS2* plants and found that silencing of *GhSAMS1* or *GhSAMS2* enhanced the feeding preference of *S. litura* larvae. On the basis of these results, a schematic diagram of the regulation of cotton pest defense by *GhCPK33* and *GhCPK74* is shown in Supplemental Figure 14. We speculate that *GhCPK33* and *GhCPK74*, as upstream signaling factors, may regulate multiple pathways in response to



herbivory stress. In this study, we provide evidence to support the negative regulation of cotton insect resistance by *GhCPK33* and *GhCPK74*. However, the roles of *GhCPK33* and *GhCPK74* in the regulation of JA synthesis are still unclear, and further study is needed to reveal the underlying mechanism of GhCPK-regulated insect resistance.

## METHODS

### Genome-wide comprehensive analysis of the *GhCPK* gene family

Genomic data for *G. hirsutum* and *G. raimondii* were obtained from Cottongen (<https://www.cottongen.org/>). Genomic data for *A. thaliana* and *O. sativa* were acquired from Ensembl Plants (<http://plants.ensembl.org/index.html>) and the Rice Genome Annotation Project ([http://rice.uga.edu/downloads\\_gad.shtml](http://rice.uga.edu/downloads_gad.shtml)), respectively. CDPK protein sequences from *A. thaliana*, *O. sativa*, and *G. raimondii* were used as query sequences to search the genomes of *G. hirsutum* (NBI, Zhang et al., 2015; and HAU, Wang et al., 2019b) with the BLASTP program. In addition, a local hidden Markov model-based search (HMMER) was developed based on the CDPK protein sequences to identify *GhCPKs*. The results from BLASTP and HMMER were compared to identify and exclude redundant sequences. The remaining candidate genes were then uploaded to SMART (<http://smart.embl.de/>) and CDD (<https://www.ncbi.nlm.nih.gov/cdd/>) to confirm the presence of conserved domains. Amino acid residues, molecular weights, and isoelectric points of the GhCPKs were predicted using the ProtParam tool (<https://web.expasy.org/protparam/>). DeepLoc-2.0 (<https://services.healthtech.dtu.dk/services/DeepLoc-2.0/>) was used to predict subcellular localization of the GhCPKs, DeepTMHMM (<https://dtu.biolib.com/DeepTMHMM/>) to predict transmembrane domains, and SignalP-6 (<https://biolib.com/DTU/SignalP-6/>) to predict signal peptides. A phylogenetic tree based on the full-length protein sequences of *A. thaliana*, *O. sativa*, and *G. hirsutum* was constructed using the neighbor-joining method in MEGA 7.0 software and visualized with EvoView (<http://www.evolgenius.info/evolview/#/>). Conserved motifs of the GhCPKs were analyzed using the MEME program and visualized with TBtools (Chen et al., 2020). Gene structures of the *GhCPKs* were analyzed by comparing CDSs with their corresponding genome sequences using GSDS software (<http://gsds.gao-lab.org/>). *Cis*-acting elements in the *GhCPK* promoters were analyzed using the PlantCARE database (<http://bioinformatics.psb.ugent.be/webtools/plantcare/html/>). A collinearity analysis between *G. hirsutum* and three other species was performed using MCScanX software. Results of all the aforementioned analyses were visualized with TBtools. Images of *GhCPK* gene locations on chromosomes and genome-wide gene duplication events were produced with Circos software.

### Expression profiling of *GhCPKs* in different tissues and stress conditions

Gene expression data for different tissues and abiotic stresses were obtained from TM-1 transcriptome data (Zhang et al., 2015). Transcriptome data for *S. litura* and *H. armigera* OS-induced gene expression at different time points were obtained from the NCBI Sequence Read Archive (NCBI: PRJNA522889) (Si et al., 2020). Transcriptomic data for ZS and HR cultivars at four time points after whitefly infestation were obtained from previous research in our lab (Li et al., 2016). For different RNA sequencing reads, low-quality reads were filtered using Trimmomatic (v.0.39), and clean reads were mapped to the TM-1 reference genome using HISAT2 (v.2.2.1) (Kim et al., 2019). The expression levels (transcripts per million) of genes were calculated using StringTie (v.2.1.4). If a gene had a value of transcripts per million >0, it was considered to be expressed. Differentially expressed genes were identified using the DESeq2 package with false discovery rate <0.05 and  $|\log_2(\text{fold change})| \geq 1$  (Varet et al., 2016). TBtools was used for heatmap visualization.

### sgRNA design

To construct a mutant library of the *GhCPK* gene family, we used CRISPR-P 2.0 software (<http://crispr.hzau.edu.cn/cgi-bin/CRISPR2/CRISPR>) to design sgRNAs for 82 *GhCPK* genes and 41 pairs of homologous *GhCPK* genes, with the *G. hirsutum* (v1.1) genome as the reference sequence. A total of 246 sgRNAs were designed (Supplemental Table 2). Genome-wide comparison screening was performed, and the principles for sgRNA design were as follows: priority was given to sgRNAs that had more than two mismatches with other non-target genes, sgRNAs with a CG content between 40% and 60% were preferred, and sgRNAs in the key CDS region were prioritized.

### Construction of a knockout vector library for the *GhCPK* gene family

We used the efficient CRISPR-Cas9 knockout vector *pRGEB32-GhU6.7*, which was developed specifically for upland cotton (Wang et al., 2018). The two BstBI restriction sites were used for complete enzymatic digestion of the vector, and the linearized plasmid was used as the ligation vector. The 246 selected sgRNA sequences were reverse complemented, and the reverse-complemented sequences were used to synthesize primers with the TTCTAGCTCTAAAC adapter added to the 5' end and the TGCACCAGCCGGGAAT adapter added to the 3' end. To ensure coverage and ease of operation, the 246 synthetic primers were divided into six groups, each containing 40 or 41 primers. The primers in each group were mixed in equal amounts to form a primer pool, and amplification was performed using the *PGTR* plasmid as the template. The PCR products were then cloned into the linearized vector *pRGEB32-GhU6.7* using In-Fusion cloning technology. The cloned plasmid was heat-shock-transformed into the *Escherichia coli* strain Trans5 $\alpha$  at 42°C and incubated at 37°C for 15 h. All *E. coli* colonies were collected, and plasmids were extracted using the TIANprep Mini Plasmid Kit (TIANGEN, Beijing, China). The concentration of each group of plasmids was determined using a spectrophotometer, and equal amounts of plasmids from each group were mixed into one plasmid pool for *Agrobacterium*-mediated transformation. Multiple electroporations were performed for *Agrobacterium* GV3101 transformation to ensure a sufficient number of colonies and plasmid coverage. After 2 days of growth, all *Agrobacterium* colonies were scraped and stored at -80°C for cotton genetic transformation. All steps are illustrated in Figure 2C.

### Construction of overexpression and VIGS vectors

The full-length CDS sequences of *GhCPK33* and *GhCPK74* were amplified using the cDNA sequence of Jin668 as a template. The amplified sequences were inserted into the *pK2GW7* overexpression vector using Gateway cloning technology (Karimi et al., 2002). The recombinant overexpression plasmid was transformed into *Agrobacterium* by electroporation and reserved for genetic transformation in cotton. VIGS fragments of *GhSAMS1* and *GhSAMS2* were amplified using the cDNA sequence of Jin668 as a template. The PCR product was cloned into the TRV:00 enzyme linear products using In-Fusion cloning technology (Gao et al., 2013). The recombinant VIGS vector plasmid was transformed into *Agrobacterium* by electroporation and used for VIGS experiments.

### Barcode high-throughput sequencing detects sgRNAs in T0-generation plants of the *GhCPK* mutant library

To identify the sgRNA sequences carried by each mutant plant, we used a barcode high-throughput sequencing strategy. Because only sgRNA sequences in *pRGEB32-GhU6.7* vectors carried by different plants were different, we designed primer pairs for the common vector sequences upstream and downstream of the sgRNAs according to the location of sgRNAs on the *pRGEB32-GhU6.7* vectors (Supplemental Figure 7A). A 9-nucleotide barcode was then added to the 5' end of each primer pair. A total of 28 barcode primers were designed, which, depending on the combination of primer pairs, could simultaneously detect 192 samples (Supplemental Table 5). After mixing all amplified sequences,

high-throughput sequencing was performed, and the sgRNA sequences carried by each plant were determined on the basis of their different barcodes.

### High-throughput sequencing for detection of gene editing

According to the sgRNA sequence carried by each plant in the *GhCPK* mutant library, the gene ID of the edited gene was determined. Primers were then designed upstream and downstream of the target sequence on the basis of their positions within the full-length sequence of the target gene (Supplemental Table 6). The CRISPR–Cas9 system can introduce a large number of indels at the target editing site, and the upstream and downstream primers should therefore not be designed too close to the target site and should have a minimum spacing of at least 30 bp. The amplified fragments are generally not longer than 280 bp. To maintain consistency in PCR amplification conditions, all primer-annealing temperatures in this experiment were designed to be between 58°C and 60°C. After amplification, all PCR products were mixed for high-throughput sequencing, and the gene-editing status of each plant in the *GhCPK* mutant library was determined.

### Identification of insect-resistance phenotypes in plants of the *GhCPK* mutant library

We performed a statistical analysis of the damage caused by chewing pests on T1-generation positive gene-edited materials from the mutant library in our experimental field in Wuhan. All plants were planted on April 18, 2021, and during the following weeks they were infested by chewing pests such as *H. armigera*, *Spodoptera exigua*, and *S. litura* that occurred naturally in the environment. On June 10, 2021, we performed a statistical analysis of the extent of damage caused by chewing insect pests. We repeated the same field trial and statistical analyses in 2022. We also performed no-choice feeding experiments on all materials using *S. litura* larvae. On June 15, 2021, we performed a no-choice feeding experiment with *S. litura* larvae on 243 field plant lines. Twelve *S. litura* larvae with a body weight of about 0.018–0.022 g were selected from each plant line for feeding. Each larva was placed in a glass dish (9 cm in diameter) and fed fresh cotton leaves every day for four consecutive days. The weights of the *S. litura* larvae were recorded daily. The experiment was repeated in 2022.

### Evolution and domestication of the *GhCPK33* and *GhCPK74* loci

Resequencing data and RNA sequencing data were obtained from previous studies (Li et al., 2021). VCFtools (v0.1.16) was used to extract SNP variants from the samples, perform quality control, and calculate nucleotide diversity ( $\pi$ ) with the specified parameters (–maf 0.01, –hwe 0.01) (Danecek et al., 2011). Plink (version 1.9) was used to convert file formats (Purcell et al., 2007). Gene structures were visualized using the gene structure files through the GSDS website (<http://gsds.gao-lab.org/>). Haplotype analysis was performed by analyzing SNP variants with R scripts.

### Measurement of $Ca^{2+}$ flux in cotton leaf epidermal cells and quantification of JA content in cotton leaves

Seeds of T1-generation *cpk33*, *cpk74*, *cpk33/74*, *CPK33-OE*, *CPK74-OE*, and WT materials were sown at the same time and cultivated under the same conditions (Supplemental Figure 12A). High-throughput sequencing was performed on all T2-generation plants, and all exhibited 100% editing (Supplemental Figure 12B). Expression levels of *GhCPK33* and *GhCPK74* were measured in the T2-generation overexpression materials, *CPK33-OE1*, *CPK33-OE2*, *CPK74-OE1*, and *CPK74-OE3* (Supplemental Figure 12C), confirming the sustained high expression of *GhCPK33* and *GhCPK74* in these plants.

Fresh leaves were collected from cotton plants and immediately soaked in test buffer (0.1 mM  $CaCl_2$ ) for 2 h.  $Ca^{2+}$  flux was measured using the non-invasive micro-test technique (NMT-YG-100, YoungerUSA, Amherst, MA,

USA) as described previously (Wang et al., 2019a). Before treatment of leaves with *S. litura* OS, the steady-state flux of leaf mesophyll cells was recorded continuously for 5 min. Subsequently, 30  $\mu$ l of *S. litura* OS was slowly added to the measuring buffer, and the transient flux of  $Ca^{2+}$  was recorded and sustained for 5 min. At least three leaf mesophyll cells were tested for each line.

To measure the concentration of JA in cotton leaf samples, approximately 100 mg of leaf material was extracted twice with 80% cold methanol (v/v) overnight at 4°C. For each sample, 10 ng ( $\pm$ )-9,10-dihydro-JA (Olchemim) was added as an internal standard. The two extracts were combined, and the mixture was evaporated to the aqueous phase using  $N_2$ , dissolved in 0.4 mL of methanol, and filtered using a syringe-facilitated filter (Nylon 66; Jin Teng Experiment Equipment, Tianjin, China). The samples were stored at –80°C before measurement. JA levels were quantified using a high-pressure liquid chromatography–tandem mass spectrometry system (AB SCIEX Triple Quad 5500 LC/MS/MS) with JA (Sigma) as the external standard (Sun et al., 2014).

### Subcellular localization

The CDSs of *GhCPK33* and *GhCPK74* were cloned into the C-terminal fusion GFP vector *pGWB405*. The recombinant vectors *pGWB405-GhCPK33* and *pGWB405-GhCPK74* were transiently expressed in tobacco epidermal cells after *Agrobacterium*-mediated transfection. Protein localization was observed using an Olympus FV1200 confocal microscope 2 days after *Agrobacterium* transfection. CBL1:RFP was used as a plasma membrane marker, and HY5:RFP was used as a nuclear marker.

### Y2H, LCI, and BiFC assays

The CDSs of *GhCPK33* and *GhCPK74* were cloned into *pGBKT7* to generate a bait vector and transformed into yeast strain Y2H. The CDSs of *GhSAMS1* and *GhSAMS2* were cloned into *pGADT7* to generate prey vectors and transformed into yeast strain Y187. The interactions between bait and prey were assessed by growth on SD-Leu-Trp (SD-2) medium and SD-Leu-Trp-His-Ade (SD-4) medium. For the LCI assays, the CDSs of *GhCPK33* and *GhCPK74* were cloned into the *JW771* vector, and the CDSs of *GhSAMS1* and *GhSAMS2* were cloned into the *JW772* vector. The recombinant vectors were transformed into *A. tumefaciens* GV3101 and transiently expressed in *Nicotiana benthamiana* leaves by injection with needleless syringes. Fluorescence signals of luciferase (LUC) luminescence in LCI were observed with a cryogenically cooled charge-coupled device camera (NightSHADE LB 985). For BiFC assays, the CDSs of *GhCPK33* and *GhCPK74* were cloned into the *pxy104-cYFP* vector, and the CDSs of *GhSAMS1* and *GhSAMS2* were cloned into the *pxy106-nYFP* vector. The vectors were transformed into *A. tumefaciens* strain GV3101 and transiently expressed in *N. benthamiana* leaves by injection with needleless syringes. Fluorescence in the *N. benthamiana* epidermal cells was observed 60 h later using a confocal microscope (Olympus FV1200).

### qRT-PCR

For each sample, 3  $\mu$ g of RNA was reverse transcribed into cDNA using M-MLV reverse transcriptase (Promega). The real-time qRT-PCR reactions were performed using the QuantStudio 6 Flex Real-Time PCR System (Applied Biosystems), and *GhUB7* was used as the internal control gene (Tu et al., 2007).

### In vitro pull-down assays

The full-length CDSs of *GhCPK33* and *GhCPK74* were separately cloned into the *pGEX-6P-1* vector (fused with the GST tag) using the Gateway technique. The full-length CDSs of *GhSAMS1* and *GhSAMS2* were separately cloned into the *pet-SUMO* vector (fused with the His tag) using the Gateway technique. In total, four vectors were constructed, *GST-GhCPK33*, *GST-GhCPK74*, *His-GhSAMS1*, and *His-GhSAMS2*. These constructs were transformed into *E. coli* BL21 (DE3) for prokaryotic expression. The GST fusion protein and the target His fusion protein

## Plant Communications

were co-incubated in pull-down buffer at 4°C for 2 h. GST protein was used as a blank control. After 2 h, 20 µl of the incubation system was taken as the input sample to detect the interaction between GST and His proteins. GST beads were added and incubated at 4°C for 2 h. After four washes with pull-down buffer, samples were prepared for western blot analysis (Chen et al., 2023).

## AVAILABILITY OF MATERIALS

The *GhCPK* mutants/transgenic lines generated in this study can be obtained by contacting the corresponding author.

## FUNDING

This work was supported by Biological Breeding of Stress Tolerant and High Yield Cotton Varieties (2023ZD04040) to L.M., the National Natural Science Fund of China for Distinguished Young Scholars (32325039) and the National Natural Science Foundation of China (32272128) to S.J., the National Natural Science Foundation of China (32401780) and the Key Scientific and Technological Project of Henan Province (222102110151) to S.L., and the Major Science and Technology Project of Xinjiang Uygur Autonomous Region (2023A02003-2) to B.L.

## ACKNOWLEDGMENTS

No conflict of interest is declared.

## AUTHOR CONTRIBUTIONS

S.J., X.Z., W.G., L.M., and B.L. provided the experimental design and supervision. F.W., S.L., and L.L. performed the experiments and manuscript preparation. Q.W. and Z.X. provided assistance with data analysis. G.W., T.H., C.F., Y.F., and L.C. provided suggestions and modified the manuscript.

## SUPPLEMENTAL INFORMATION

Supplemental information is available at *Plant Communications Online*.

Received: March 2, 2024

Revised: July 10, 2024

Accepted: August 7, 2024

Published: August 12, 2024

## REFERENCES

- Bai, M., Yuan, J., Kuang, H., Gong, P., Li, S., Zhang, Z., Liu, B., Sun, J., Yang, M., Yang, L., et al. (2020). Generation of a multiplex mutagenesis population via pooled CRISPR-Cas9 in soya bean. *Plant Biotechnol. J.* **18**:721–731.
- Batistic, O., and Kudla, J. (2012). Analysis of calcium signaling pathways in plants. *Biochim. Biophys. Acta* **1820**:1283–1293.
- Bortesi, L., and Fischer, R. (2015). The CRISPR/Cas9 system for plant genome editing and beyond. *Biotechnol. Adv.* **33**:41–52.
- Chen, C., Chen, H., Zhang, Y., Thomas, H.R., Frank, M.H., He, Y., and Xia, R. (2020). TBtools: An Integrative Toolkit Developed for Interactive Analyses of Big Biological Data. *Mol. Plant* **13**:1194–1202.
- Chen, L., Zhang, B., Xia, L., Yue, D., Han, B., Sun, W., Wang, F., Lindsey, K., Zhang, X., and Yang, X. (2023). The GhMAP3K62-GhMKK16-GhMPK32 kinase cascade regulates drought tolerance by activating GhEDT1-mediated ABA accumulation in cotton. *J. Adv. Res.* **51**:13–25.
- Chen, Y., Zou, T., and McCormick, S. (2016). S-Adenosylmethionine Synthetase 3 Is Important for Pollen Tube Growth. *Plant Physiol.* **172**:244–253.
- Chen, Z.J., Scheffler, B.E., Dennis, E., Triplett, B.A., Zhang, T., Guo, W., Chen, X., Stelly, D.M., Rabinowicz, P.D., Town, C.D., et al. (2007). Toward sequencing cotton (*Gossypium*) genomes. *Plant Physiol.* **145**:1303–1310.
- Danecek, P., Auton, A., Abecasis, G., Albers, C.A., Banks, E., DePristo, M.A., Handsaker, R.E., Lunter, G., Marth, G.T., Sherry, S.T., et al.; 1000 Genomes Project Analysis Group (2011). The variant call format and VCFtools. *Bioinformatics* **27**:2156–2158.
- Erb, M., Meldau, S., and Howe, G.A. (2012). Role of phytohormones in insect-specific plant reactions. *Trends Plant Sci.* **17**:250–259.
- Erb, M., and Reymond, P. (2019). Molecular Interactions Between Plants and Insect Herbivores. *Annu. Rev. Plant Biol.* **70**:527–557.
- Fan, R., Li, X., Wang, S., Yu, D., and Wang, H. (2018). The soybean S-adenosylmethionine synthetase gene GmSAMS1 confers resistance to common cutworm in transgenic tobacco. *Soybean Sci.* **37**:268–274.
- Gaillochet, C., Develtere, W., and Jacobs, T.B. (2021). CRISPR screens in plants: approaches, guidelines, and future prospects. *Plant Cell* **33**:794–813.
- Gao, W., Long, L., Zhu, L.F., Xu, L., Gao, W.H., Sun, L.Q., Liu, L.L., and Zhang, X.L. (2013). Proteomic and virus-induced gene silencing (VIGS) Analyses reveal that gossypol, brassinosteroids, and jasmonic acid contribute to the resistance of cotton to *Verticillium dahliae*. *Mol. Cell. Proteomics* **12**:3690–3703.
- Hamel, L.P., Sheen, J., and Séguin, A. (2014). Ancient signals: comparative genomics of green plant CDPKs. *Trends Plant Sci.* **19**:79–89.
- He, M.W., Wang, Y., Wu, J.Q., Shu, S., Sun, J., and Guo, S.R. (2019). Isolation and characterization of S-Adenosylmethionine synthase gene from cucumber and responsive to abiotic stress. *Plant Physiol. Biochem.* **141**:431–445.
- Heckel, D.G. (2012). Ecology. Insecticide resistance after Silent spring. *Science* **337**:1612–1614.
- Howe, G.A., and Jander, G. (2008). Plant immunity to insect herbivores. *Annu. Rev. Plant Biol.* **59**:41–66.
- Huang, Y., Wan, P., Zhang, H., Huang, M., Li, Z., and Gould, F. (2013). Diminishing returns from increased percent Bt cotton: the case of pink bollworm. *PLoS One* **8**:e68573.
- Jacobs, T.B., Zhang, N., Patel, D., and Martin, G.B. (2017). Generation of a Collection of Mutant Tomato Lines Using Pooled CRISPR Libraries. *Plant Physiol.* **174**:2023–2037.
- Jin, S., Zhang, X., Nie, Y., Guo, X., Liang, S., and Zhu, H. (2006). Identification of a novel elite genotype for in vitro culture and genetic transformation of cotton. *Biol. Plant. (Prague)* **50**:519–524.
- Kanchiswamy, C.N., Takahashi, H., Quadro, S., Maffei, M.E., Bossi, S., Berteau, C., Zebelo, S.A., Muroi, A., Ishihama, N., Yoshioka, H., et al. (2010). Regulation of Arabidopsis defense responses against *Spodoptera littoralis* by CPK-mediated calcium signaling. *BMC Plant Biol.* **10**:97.
- Karimi, M., Inzé, D., and Depicker, A. (2002). GATEWAY vectors for Agrobacterium-mediated plant transformation. *Trends Plant Sci.* **7**:193–195.
- Kim, D., Paggi, J.M., Park, C., Bennett, C., and Salzberg, S.L. (2019). Graph-based genome alignment and genotyping with HISAT2 and HISAT-genotype. *Nat. Biotechnol.* **37**:907–915.
- Li, F., Fan, G., Wang, K., Sun, F., Yuan, Y., Song, G., Li, Q., Ma, Z., Lu, C., Zou, C., et al. (2014). Genome sequence of the cultivated cotton *Gossypium arboreum*. *Nat. Genet.* **46**:567–572.
- Li, J., Yuan, D., Wang, P., Wang, Q., Sun, M., Liu, Z., Si, H., Xu, Z., Ma, Y., Zhang, B., et al. (2021). Cotton pan-genome retrieves the lost sequences and genes during domestication and selection. *Genome Biol.* **22**:119.
- Li, J., Zhu, L., Hull, J.J., Liang, S., Daniell, H., Jin, S., and Zhang, X. (2016). Transcriptome analysis reveals a comprehensive insect resistance response mechanism in cotton to infestation by the

## Mutant library of the cotton *CDPK* gene family



- phloem feeding insect *Bemisia tabaci* (whitefly). *Plant Biotechnol. J.* **14**:1956–1975.
- Li, X., Hu, D., Cai, L., Wang, H., Liu, X., Du, H., Yang, Z., Zhang, H., Hu, Z., Huang, F., et al. (2022). CALCIUM-DEPENDENT PROTEIN KINASE38 regulates flowering time and common cutworm resistance in soybean. *Plant Physiol.* **190**:480–499.
- Li, Y., Hallerman, E.M., Wu, K., and Peng, Y. (2020). Insect-Resistant Genetically Engineered Crops in China: Development, Application, and Prospects for Use. *Annu. Rev. Entomol.* **65**:273–292.
- Liu, H.J., Jian, L., Xu, J., Zhang, Q., Zhang, M.L., Jin, M., Peng, Y., Zhang, M., Han, B., Liu, J., et al. (2020). High-Throughput CRISPR/Cas9 Mutagenesis Streamlines Trait Gene Identification in Maize. *Plant Cell* **32**:1397–1413.
- Liu, T.Z., Zhang, X.N., Li, K., Yao, Q., Zhong, D.T., Deng, Q., and Lu, Y.M. (2023). Large-scale Genome Editing in Plants: Approaches, Applications, and Future Perspectives (*Curr Opin Biotech*), p. 79.
- Lu, Y., Wu, K., Jiang, Y., Xia, B., Li, P., Feng, H., Wyckhuys, K.A.G., and Guo, Y. (2010). Mirid bug outbreaks in multiple crops correlated with wide-scale adoption of Bt cotton in China. *Science* **328**:1151–1154.
- Lu, Y., Ye, X., Guo, R., Huang, J., Wang, W., Tang, J., Tan, L., Zhu, J.K., Chu, C., and Qian, Y. (2017). Genome-wide Targeted Mutagenesis in Rice Using the CRISPR/Cas9 System. *Mol. Plant* **10**:1242–1245.
- Markham, G.D., Hafner, E.W., Tabor, C.W., and Tabor, H. (1983). S-Adenosylmethionine Synthetase (Methionine Adenosyltransferase) (*Escherichia-Coli*). *Method Enzymol* **94**:219–222.
- Pan, C., Li, G., Bandyopadhyay, A., and Qi, Y. (2023). Guide RNA library-based CRISPR screens in plants: opportunities and challenges. *Curr. Opin. Biotechnol.* **79**:102883.
- Purcell, S., Neale, B., Todd-Brown, K., Thomas, L., Ferreira, M.A.R., Bender, D., Maller, J., Sklar, P., de Bakker, P.I.W., Daly, M.J., et al. (2007). PLINK: a tool set for whole-genome association and population-based linkage analyses. *Am. J. Hum. Genet.* **81**:559–575.
- Qiao, F., Huang, J., and Wang, X. (2017). Fifteen Years of Bt Cotton in China: Results from Household Surveys. *World Dev.* **98**:351–359.
- Quan, Y., and Wu, K. (2023). Managing Practical Resistance of Lepidopteran Pests to Bt Cotton in China. *Insects* **14**:179.
- Ray, S., Agarwal, P., Arora, R., Kapoor, S., and Tyagi, A.K. (2007). Expression analysis of calcium-dependent protein kinase gene family during reproductive development and abiotic stress conditions in rice (*Oryza sativa* L. ssp. *indica*). *Mol. Genet. Genomics.* **278**:493–505.
- Romeis, T., and Herde, M. (2014). From local to global: CDPKs in systemic defense signaling upon microbial and herbivore attack. *Curr. Opin. Plant Biol.* **20**:1–10.
- Romeis, T., Ludwig, A.A., Martin, R., and Jones, J.D. (2001). Calcium-dependent protein kinases play an essential role in a plant defence response. *EMBO J.* **20**:5556–5567.
- Sanders, D., Pelloux, J., Brownlee, C., and Harper, J.F. (2002). Calcium at the crossroads of signaling. *Plant Cell* **14**:S401–S417.
- Shalem, O., Sanjana, N.E., Hartenian, E., Shi, X., Scott, D.A., Mikkelsen, T., Heckl, D., Ebert, B.L., Root, D.E., Doench, J.G., et al. (2014). Genome-Scale CRISPR-Cas9 Knockout Screening in Human Cells. *Science* **343**:84–87.
- Si, H., Liu, H., Sun, Y., Xu, Z., Liang, S., Li, B., Ding, X., Li, J., Wang, Q., Sun, L., et al. (2020). Transcriptome and metabolome analysis reveal that oral secretions from *Helicoverpa armigera* and *Spodoptera litura* influence wound-induced host response in cotton. *Crop J.* **8**:929–942.
- Simeunovic, A., Mair, A., Wurzing, B., and Teige, M. (2016). Know where your clients are: subcellular localization and targets of calcium-dependent protein kinases. *J. Exp. Bot.* **67**:3855–3872.
- Sun, L., Alariqi, M., Wang, Y., Wang, Q., Xu, Z., Zafar, M.N., Yang, G., Jia, R., Hussain, A., Chen, Y., et al. (2024). Construction of Host Plant Insect-Resistance Mutant Library by High-Throughput CRISPR/Cas9 System and Identification of A Broad-Spectrum Insect Resistance Gene. *Adv. Sci.* **11**:e2306157.
- Sun, L., Zhu, L., Xu, L., Yuan, D., Min, L., and Zhang, X. (2014). Cotton cytochrome P450 CYP82D regulates systemic cell death by modulating the octadecanoid pathway. *Nat. Commun.* **5**:5372.
- Tu, L., Zhang, X., Liu, D., Jin, S., Cao, J., Zhu, L., Deng, F., Tan, J., and Zhang, C. (2007). Suitable internal control genes for qRT-PCR normalization in cotton fiber development and somatic embryogenesis. *Chinese Sci Bull* **22**:3110–3117.
- Valmonte, G.R., Arthur, K., Higgins, C.M., and MacDiarmid, R.M. (2014). Calcium-dependent protein kinases in plants: evolution, expression and function. *Plant Cell Physiol.* **55**:551–569.
- Varet, H., Brillet-Guéguen, L., Coppée, J.Y., and Dillies, M.A. (2016). SARTools: A DESeq2- and EdgeR-Based R Pipeline for Comprehensive Differential Analysis of RNA-Seq Data. *PLoS One* **11**:e0157022.
- Wang, H., Li, X., Su, F., Liu, H., Hu, D., Huang, F., Yu, D., and Wang, H. (2022). Soybean CALCIUM-DEPENDENT PROTEIN KINASE17 Positively Regulates Plant Resistance to Common Cutworm (*Spodoptera litura* Fabricius). *Int. J. Mol. Sci.* **23**:15696.
- Wang, J., Liu, X., Zhang, A., Ren, Y., Wu, F., Wang, G., Xu, Y., Lei, C., Zhu, S., Pan, T., et al. (2019a). A cyclic nucleotide-gated channel mediates cytoplasmic calcium elevation and disease resistance in rice. *Cell Res.* **29**:820–831.
- Wang, K., Wang, Z., Li, F., Ye, W., Wang, J., Song, G., Yue, Z., Cong, L., Shang, H., Zhu, S., et al. (2012). The draft genome of a diploid cotton *Gossypium raimondii*. *Nat. Genet.* **44**:1098–1103.
- Wang, M., Tu, L., Yuan, D., Zhu, D., Shen, C., Li, J., Liu, F., Pei, L., Wang, P., Zhao, G., et al. (2019b). Reference genome sequences of two cultivated allotetraploid cottons, *Gossypium hirsutum* and *Gossypium barbadense*. *Nat. Genet.* **51**:224–229.
- Wang, P., Zhang, J., Sun, L., Ma, Y., Xu, J., Liang, S., Deng, J., Tan, J., Zhang, Q., Tu, L., et al. (2018). High efficient multisites genome editing in allotetraploid cotton (*Gossypium hirsutum*) using CRISPR/Cas9 system. *Plant Biotechnol. J.* **16**:137–150.
- Wendel, J.F. (1989). New World Tetraploid Cottons Contain Old-World Cytoplasm. *P Natl Acad Sci USA* **86**:4132–4136.
- Wu, K.M., and Guo, Y.Y. (2005). The evolution of cotton pest management practices in China. *Annu. Rev. Entomol.* **50**:31–52.
- Wu, K.M., Lu, Y.H., Feng, H.Q., Jiang, Y.Y., and Zhao, J.Z. (2008). Suppression of cotton bollworm in multiple crops in China in areas with Bt toxin-containing cotton. *Science* **321**:1676–1678.
- Xu, X., Liu, M., Lu, L., He, M., Qu, W., Xu, Q., Qi, X., and Chen, X. (2015). Genome-wide analysis and expression of the calcium-dependent protein kinase gene family in cucumber. *Mol. Genet. Genomics.* **290**:1403–1414.
- Yang, D.H., Hettnerhausen, C., Baldwin, I.T., and Wu, J. (2012). Silencing *Nicotiana attenuata* calcium-dependent protein kinases, CDPK4 and CDPK5, strongly up-regulates wound- and herbivory-induced jasmonic acid accumulations. *Plant Physiol.* **159**:1591–1607.
- Yang, Z., Ge, X., Yang, Z., Qin, W., Sun, G., Wang, Z., Li, Z., Liu, J., Wu, J., Wang, Y., et al. (2019). Extensive intraspecific gene order and gene structural variations in upland cotton cultivars. *Nat. Commun.* **10**:2989.
- Ye, S., Wang, L., Xie, W., Wan, B., Li, X., and Lin, Y. (2009). Expression profile of calcium-dependent protein kinase (CDPKs) genes during the whole lifespan and under phytohormone treatment conditions in rice (*Oryza sativa* L. ssp. *indica*). *Plant Mol. Biol.* **70**:311–325.
- Yip Delormel, T., and Boudsocq, M. (2019). Properties and functions of calcium-dependent protein kinases and their relatives in *Arabidopsis thaliana*. *New Phytol.* **224**:585–604.
- Zhang, H., Wei, C., Yang, X., Chen, H., Yang, Y., Mo, Y., Li, H., Zhang, Y., Ma, J., Yang, J., et al. (2017). Genome-wide identification and

## Plant Communications

expression analysis of calcium-dependent protein kinase and its related kinase gene families in melon (*Cucumis melo* L.). *PLoS One* **12**:e0176352.

**Zhang, T., Hu, Y., Jiang, W., Fang, L., Guan, X., Chen, J., Zhang, J., Sasaki, C.A., Scheffler, B.E., Stelly, D.M., et al.** (2015). Sequencing of allotetraploid cotton (*Gossypium hirsutum* L. acc. TM-1) provides a resource for fiber improvement. *Nat. Biotechnol.* **33**:531–537.

## Mutant library of the cotton *CDPK* gene family

**Zhu, H., He, M., Jahan, M.S., Wu, J., Gu, Q., Shu, S., Sun, J., and Guo, S.** (2021). CsCDPK6, a CsSAMS1-Interacting Protein, Affects Polyamine/Ethylene Biosynthesis in Cucumber and Enhances Salt Tolerance by Overexpression in Tobacco. *Int. J. Mol. Sci.* **22**:11133.

**Zuo, R., Hu, R., Chai, G., Xu, M., Qi, G., Kong, Y., and Zhou, G.** (2013). Genome-wide identification, classification, and expression analysis of CDPK and its closely related gene families in poplar (*Populus trichocarpa*). *Mol. Biol. Rep.* **40**:2645–2662.

**Plant Communications, Volume 5**

**Supplemental information**

**CRISPR–Cas9-mediated construction of a cotton *CDPK* mutant library  
for identification of insect-resistance genes**

**Fuqiu Wang, Sijia Liang, Guanying Wang, Tianyu Hu, Chunyang Fu, Qiongqiong Wang, Zhongping Xu, Yibo Fan, Lianlian Che, Ling Min, Bo Li, Lu Long, Wei Gao, Xianlong Zhang, and Shuangxia Jin**



Figure S1

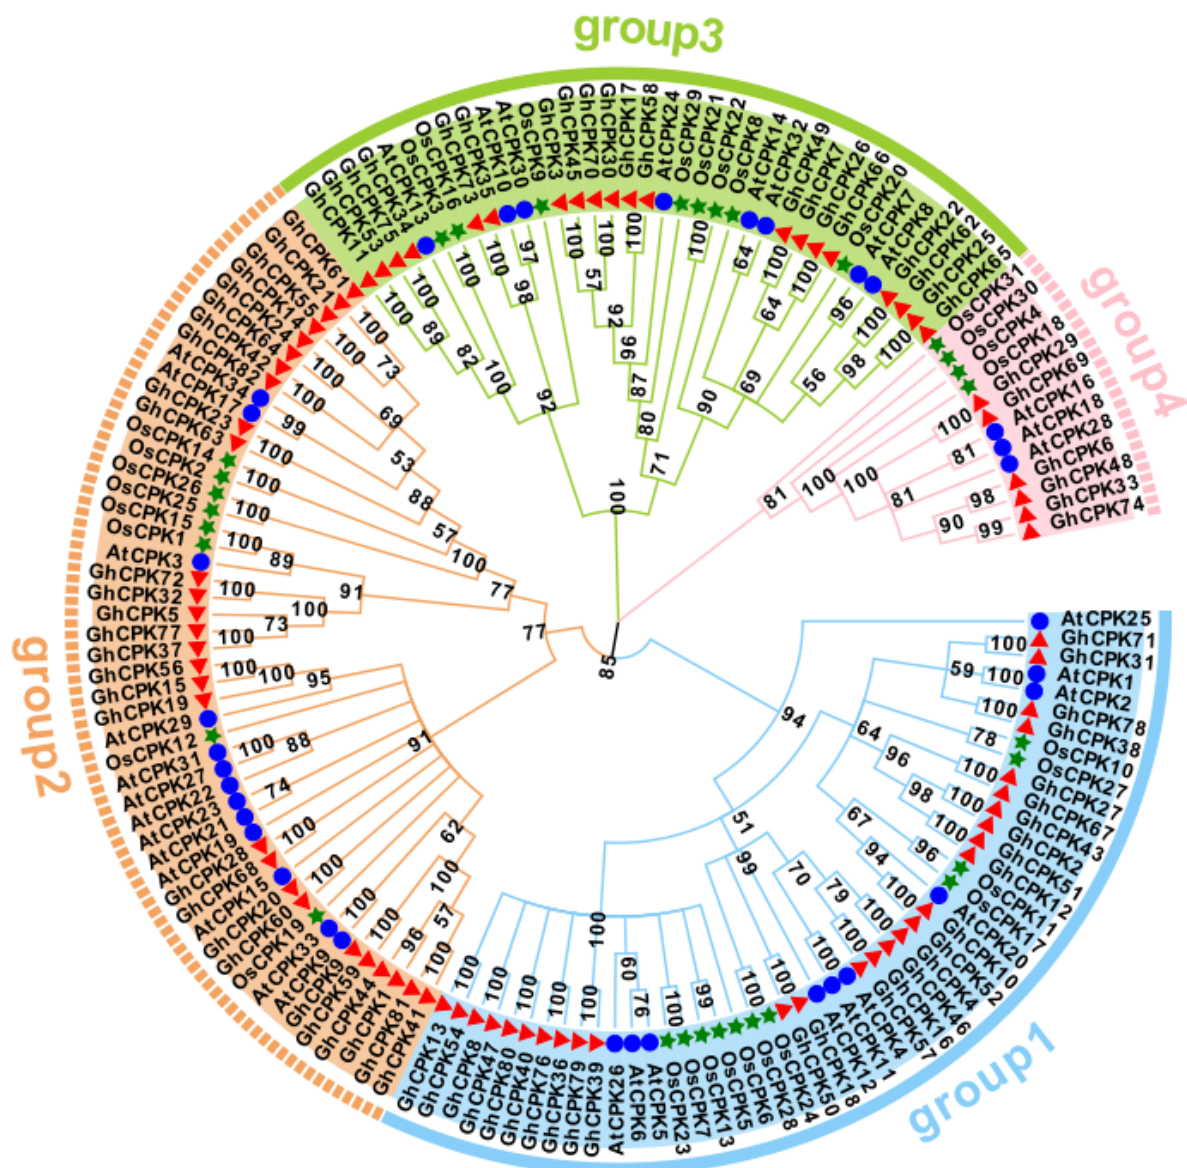

Figure S1 Phylogenetic analysis of CDPK gene families in *G. hirsutum*, *A. thaliana* and *O. sativa*. Groups 1, 2, 3, and 4 indicate different gene clusters. Different colors of symbols represent different species. Red triangles represent *G. hirsutum*, blue circles represent *A. thaliana* and green pentagrams represent *O. sativa*.

# Figure S2

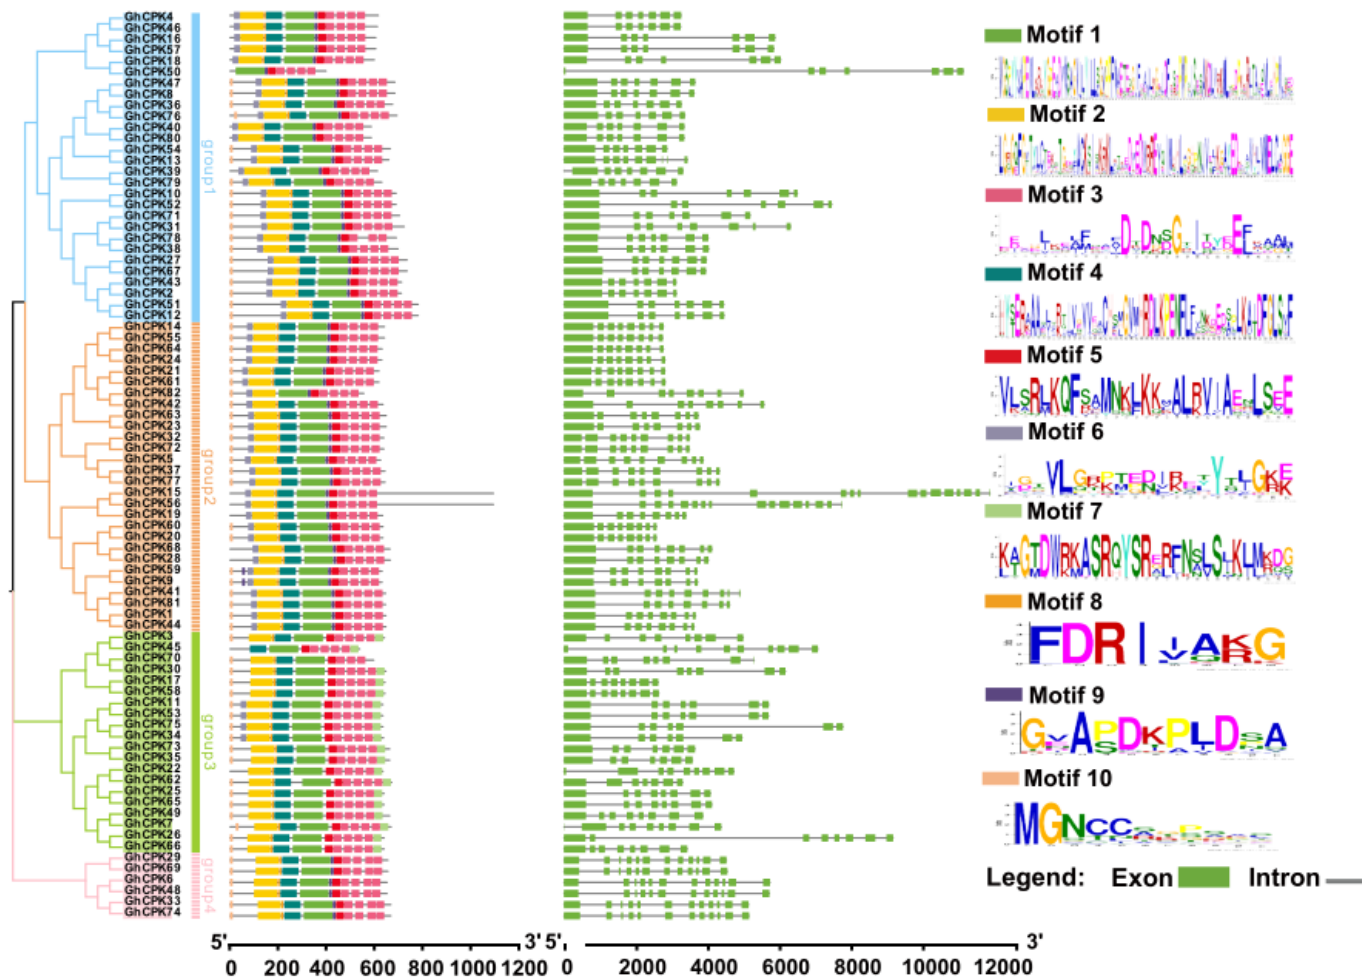

**Figure S2 Phylogenetic tree, conserved protein motifs and gene structures of *GhCPKs* gene family.** From left to right, it shows the phylogenetic tree, conserved protein motifs and gene structure of the *G. hirsutum CDPK* gene family. In the phylogenetic tree, different colors represent different subgroups. Within the protein conserved motifs, a total of 10 conserved motifs have been identified, distributed in different colored boxes. On the far right are the sequence logos of these protein motifs. In the exon-intron structure diagram, the green box represents exons and the black line represents introns.





# Figure S4

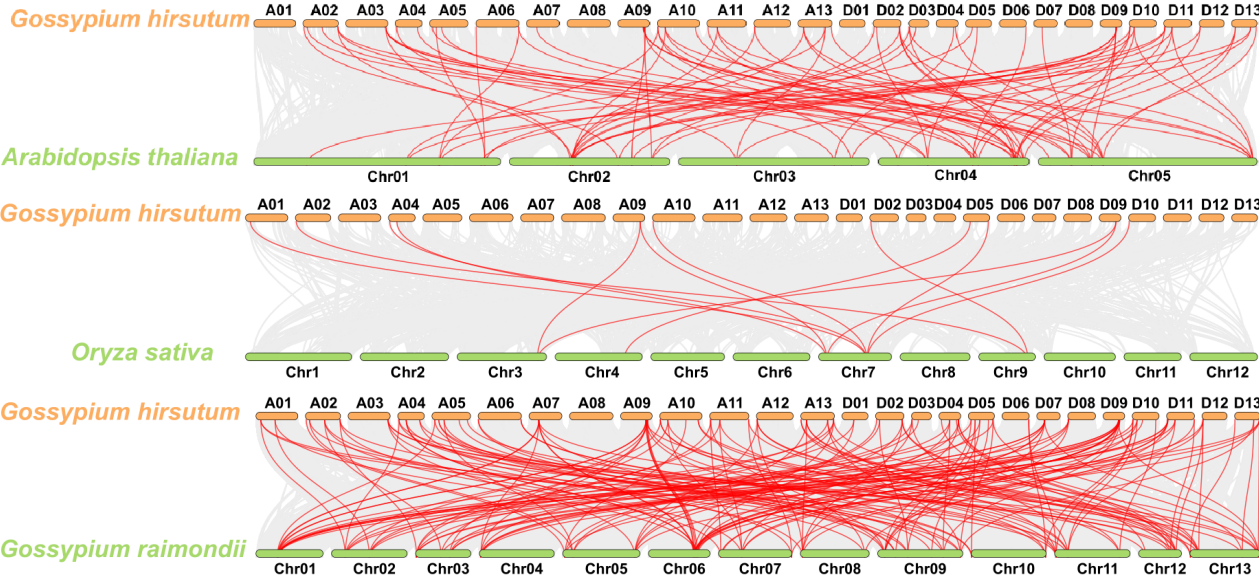

Figure S4 Collinearity analysis of CDPK genes between *G. hirsutum* with *A. thaliana*, *O. sativa* and *G. raimondii*. Grey lines indicate collinear blocks within the *G. hirsutum* genome and other plant genomes, and the red curve indicates CDPK genes with collinearity.

# Figure S5

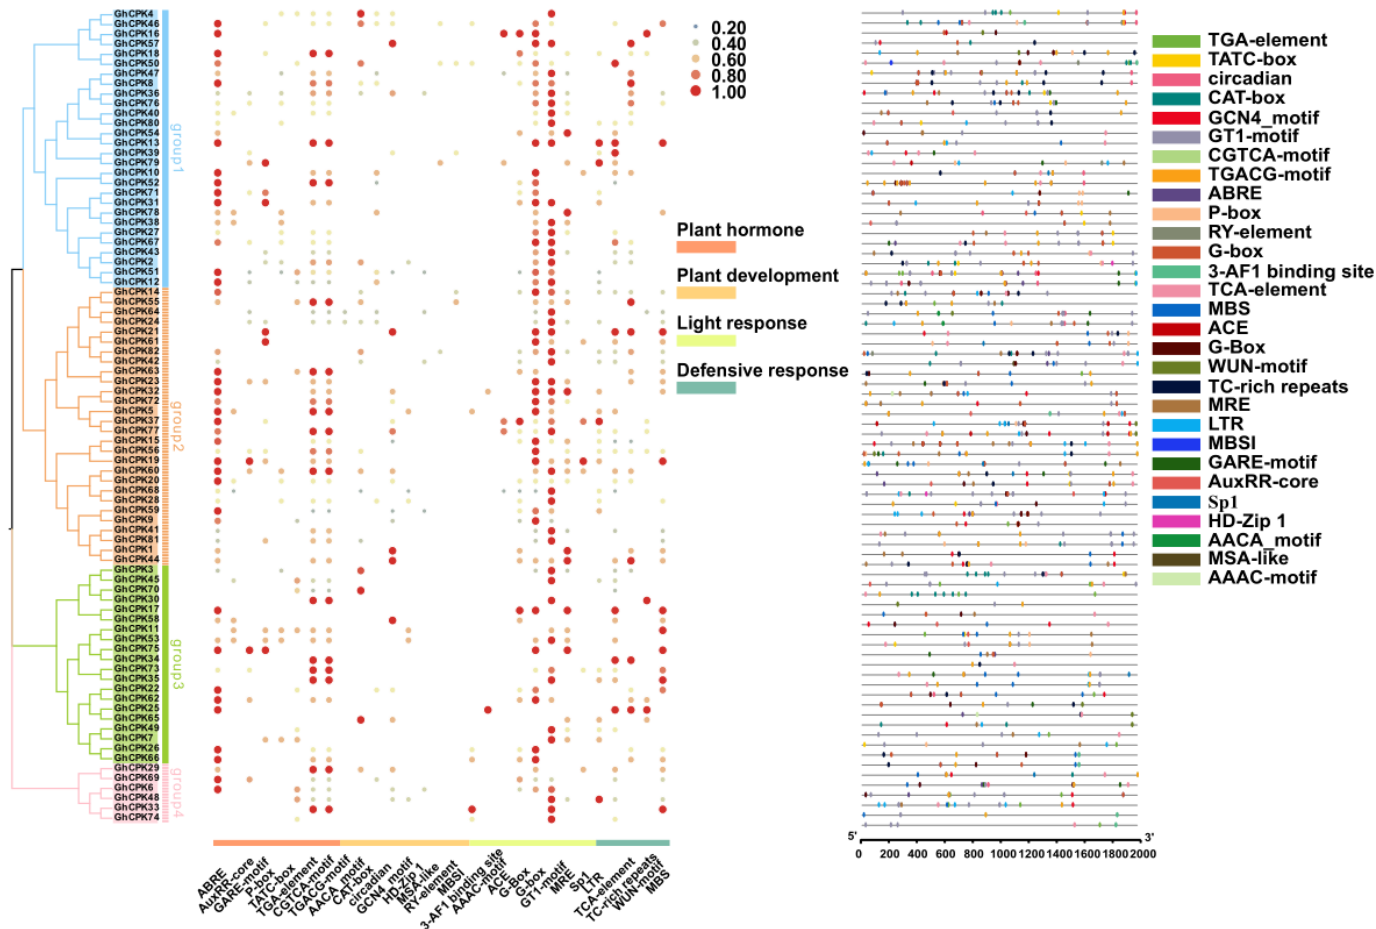

**Figure S5 Cis-acting elements in the promoter regions of *GhCPKs*.** On the left is the phylogenetic tree of the *GhCPKs* gene family. In the middle is a heat map of the number of all cis-acting elements. The larger and redder the circle, the greater the quantity represented. The diagram on the right shows the positional distribution of promoter cis-acting elements of the *GhCPK* genes. The black line indicates the promoter length of the *GhCPK* genes. The different colored boxes on the right represent cis-acting elements with different functions.

**Figure S6**

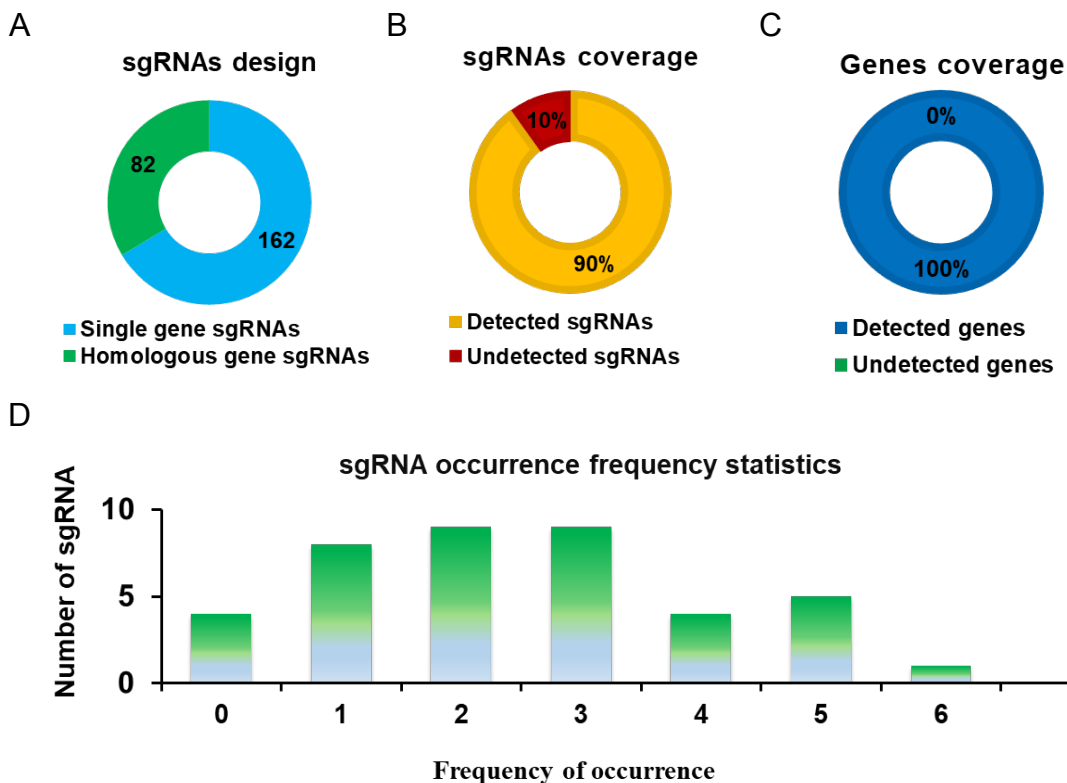

**Figure S6** The number of sgRNAs in the *GhCPKs* gene family mutant library and the preliminary experimental results of mixed pool 1. (A) The quantity of different types of sgRNAs. Blue represents the quantity of sgRNAs targeting individual *GhCPKs*, green represents the quantity of sgRNAs targeting homologous *GhCPKs*. (B) Coverage of sgRNA in the preliminary experiment. Yellow color represents detected sgRNAs, red color represents undetected sgRNAs. (C) Coverage of gene in the preliminary experiment. Deep blue color represents detected genes, green color represents undetected genes. (D) Frequency statistics of sgRNA. The X-axis represents the frequency of occurrence of target sgRNAs, and the Y-axis represents the number of sgRNAs.



# Figure S7

A

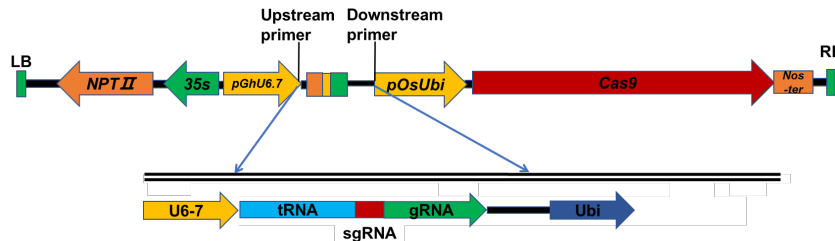

B

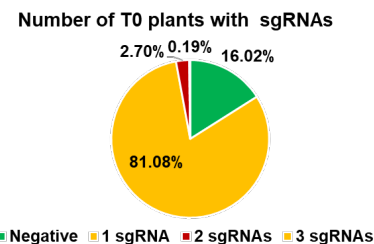

C

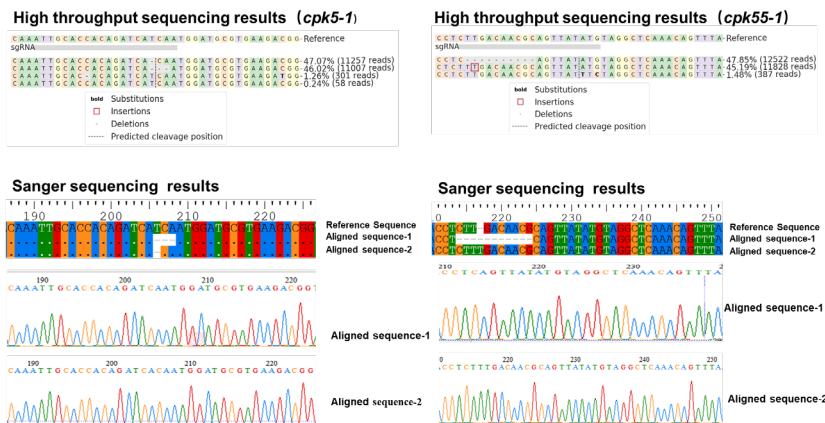

D

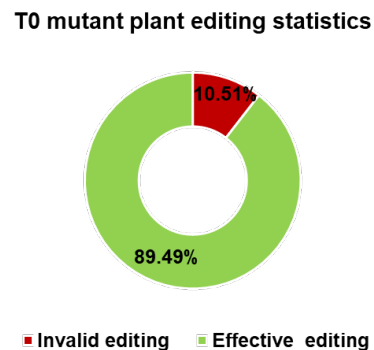

E

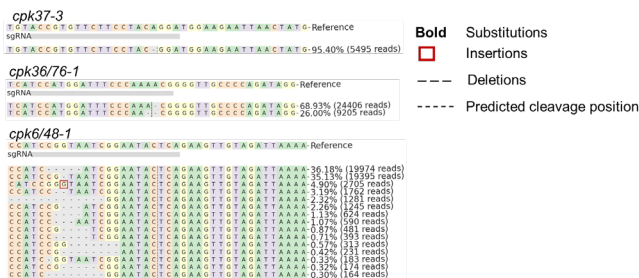

F

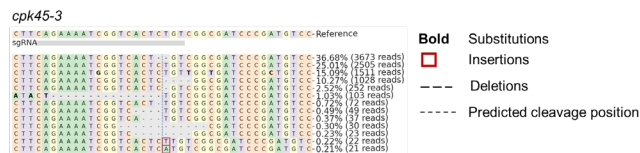

**Figure S7 Molecular detection of T0 generation *GhCPKs* mutant library plants.** (A) PCR amplification sgRNA vector sequence diagram. The different colored boxes represent different vector components. (B) Statistical analysis of the number of sgRNAs present in the T0 generation *GhCPKs* mutant library plants. Yellow means only one sgRNA, red means two sgRNA, and green means three sgRNA. (C) Comparison of high-throughput sequencing and Sanger sequencing results for gene editing plants. (D) Editing statistics of T0 generation *GhCPKs* mutant library plants. Green means that gene editing is detected, red means that gene editing is not detected. (E) Examples of one, two and multiple types of editing. Bold represents base substitutions, red boxes represent base insertions, dashes represent base deletions, and dashed lines represent predicted cleavage positions. (F) The most common editing types in the mutant library. Bold represents base substitutions, red boxes represent base insertions, dashes represent base deletions, and dashed lines represent predicted cleavage positions.

# Figure S8

A

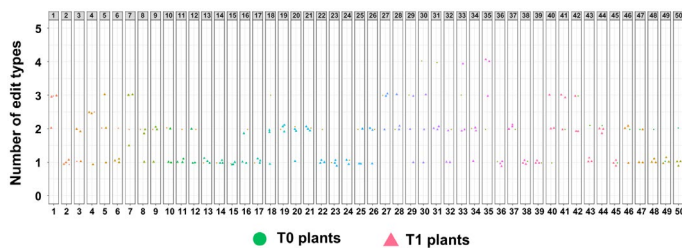

B

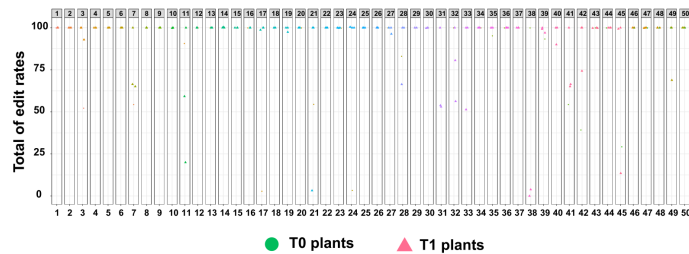

C

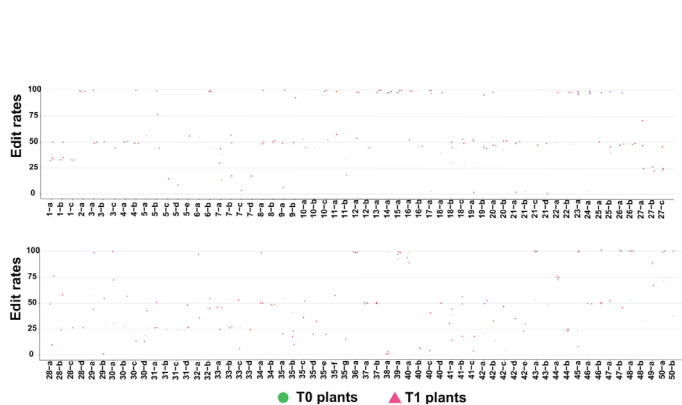

D

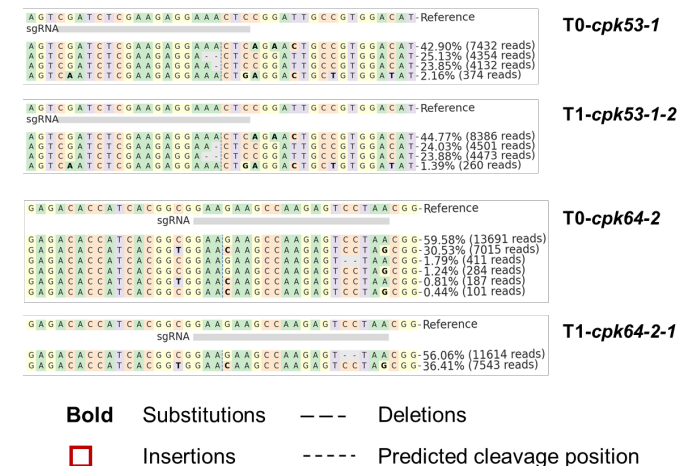

**Figure S8 Genetic analysis of 50 *GhCPKs* gene-edited plants and their 150 progeny.** (A) Editing type statistics of 50 *GhCPKs* gene-edited plants and their 150 progeny. The circle represents T0 generation plants, the triangle represents T1 generation plants. (B) Editing efficiency statistics of 50 *GhCPKs* gene-edited plants and their 150 progeny. (C) Statistical analysis of editing efficiency for each editing type in 50 *GhCPKs* gene-edited plants and their 150 progeny. (D) Examples of genetic states in different progenitor and progeny gene-edited plants. Bold represents base substitutions, red boxes represent base insertions, dashes represent base deletions, and dashed lines represent predicted cleavage positions.

# Figure S9

A

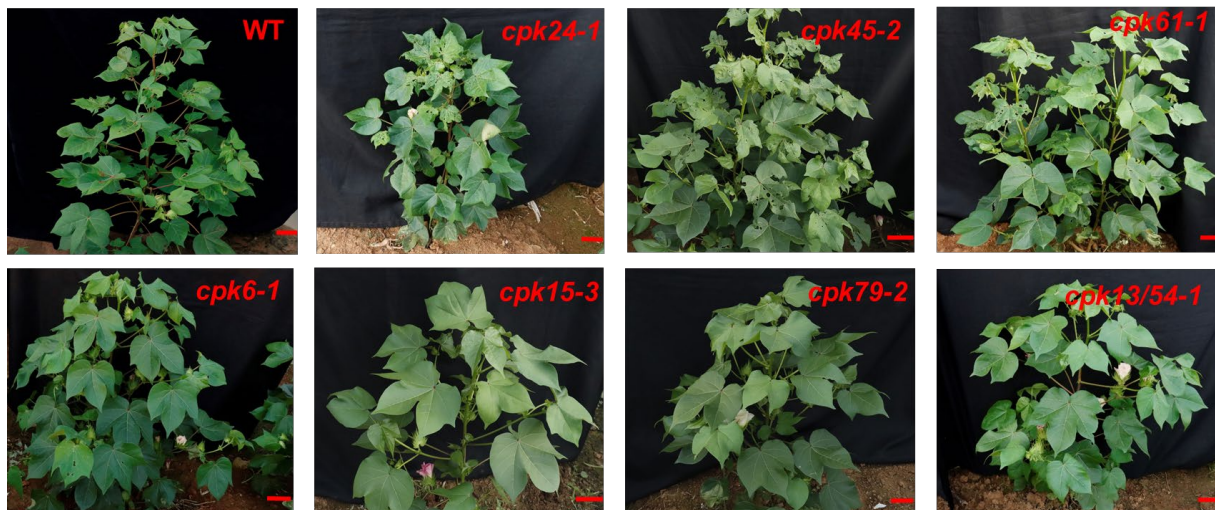

B

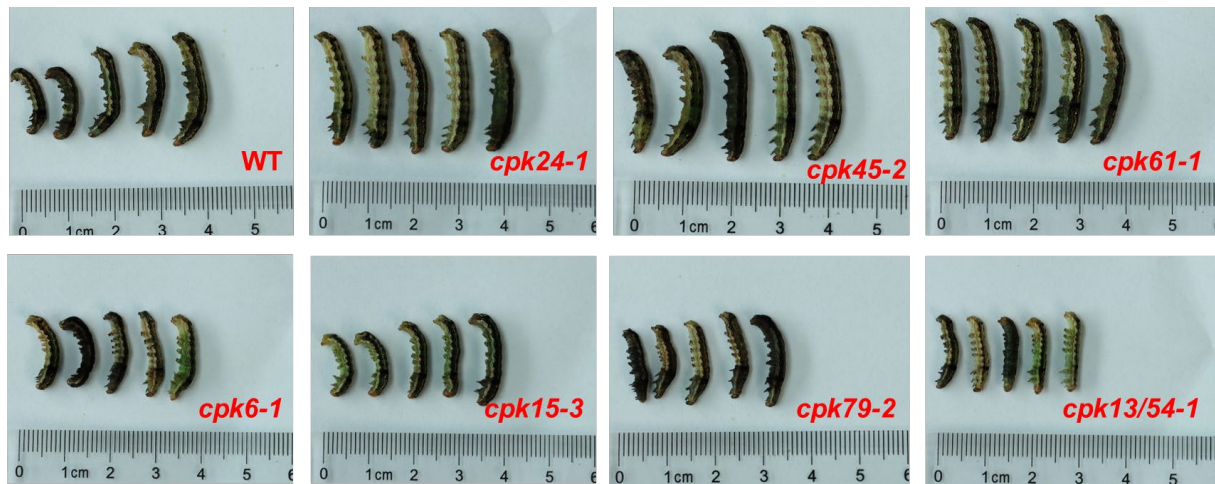

**Figure S9** Example of insect resistance phenotypic screening in *GhCPKs* mutant library plants. (A) Field insect resistance phenotype of corresponding numbered plants. (B) Phenotype of *S. litura* larvae feeding on the corresponding numbered plants five days later.



# Figure S10

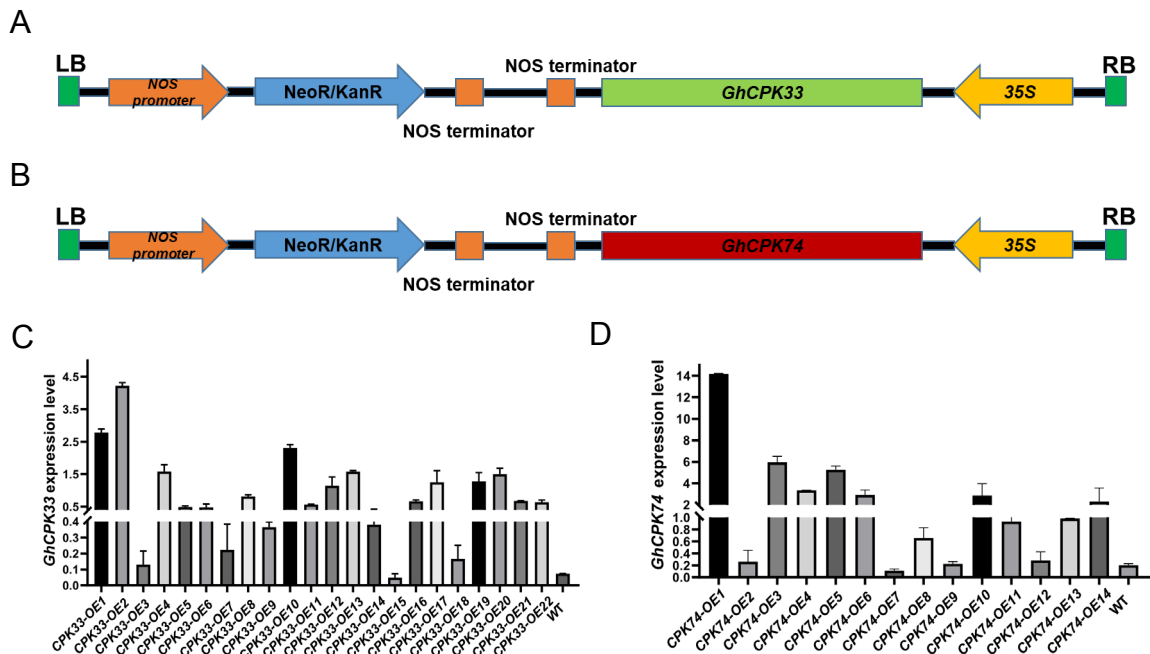

**Figure S10 Construction of expression vectors and detection of expression levels for *GhCPK33* and *GhCPK74* overexpression materials.** (A) Construction of *GhCPK33* overexpression vectors. (B) Construction of *GhCPK74* overexpression vectors. Different color boxes represent different carrier elements. (C) Detection of *GhCPK33* expression levels in T0-generation *CPK33-OE* overexpression materials. (D) Detection of *GhCPK74* expression levels in T0-generation *CPK74-OE* overexpression materials. The expression of *GhUB7* was used as internal control. Means  $\pm$  SE (n = 3).

# Figure S11

A

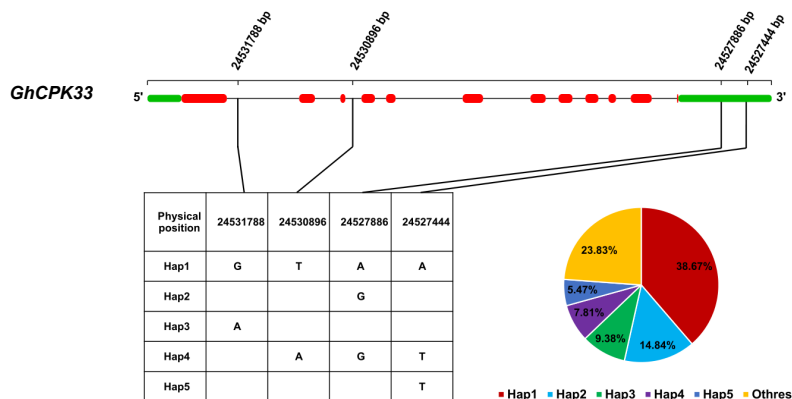

B

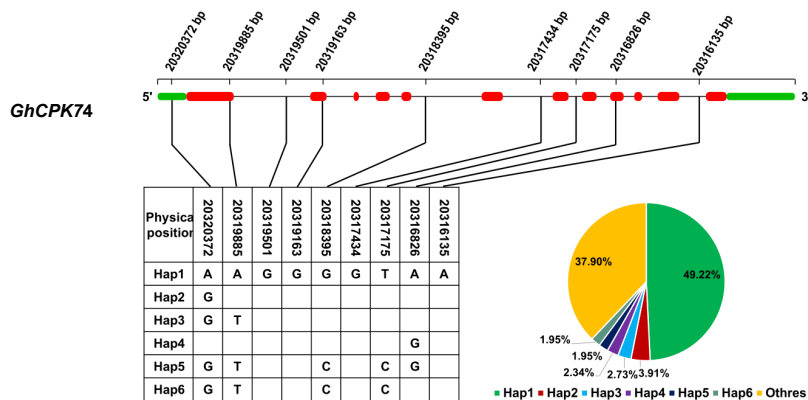

C

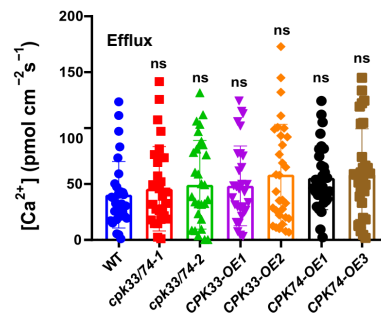

D

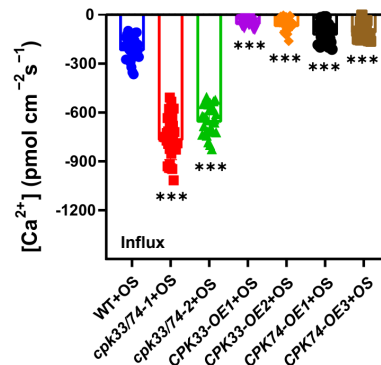

**Figure S11 Haplotype analysis of *GhCPK33* and *GhCPK74* and the detection of average  $\text{Ca}^{2+}$  flow rate in leaf mesophyll cells.**

(A) The gene *GhCPK33* structure and single-nucleotide polymorphisms (SNPs) variants contained in the Ghlandraces population showed the five haplotypes with highest proportions, and the blank boxes were the same nucleotides as the reference genome (Hap1). The pie charts show the proportion of the five haplotypes. (B) The gene *GhCPK74* structure and single-nucleotide polymorphisms (SNPs) variants contained in the Ghlandraces population showed the six haplotypes with highest proportions, and the blank boxes were the same nucleotides as the reference genome (Hap1). The pie charts show the proportion of the six haplotypes. (C) In the untreated state, the average  $\text{Ca}^{2+}$  flow rate in leaf mesophyll cells of *cpk33/74*, *CPK33-OE*, *CPK74-OE* and WT over a 5-minute period. (D) After treatment with the OS of *S. litura*, the average  $\text{Ca}^{2+}$  flow rate in leaf mesophyll cells of *cpk33/74*, *CPK33-OE*, *CPK74-OE* and WT over a 5-minute period.

# Figure S12

A

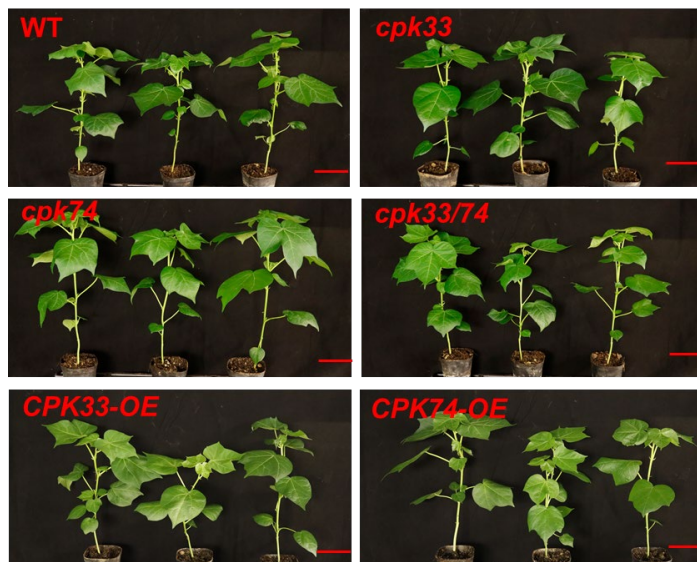

B

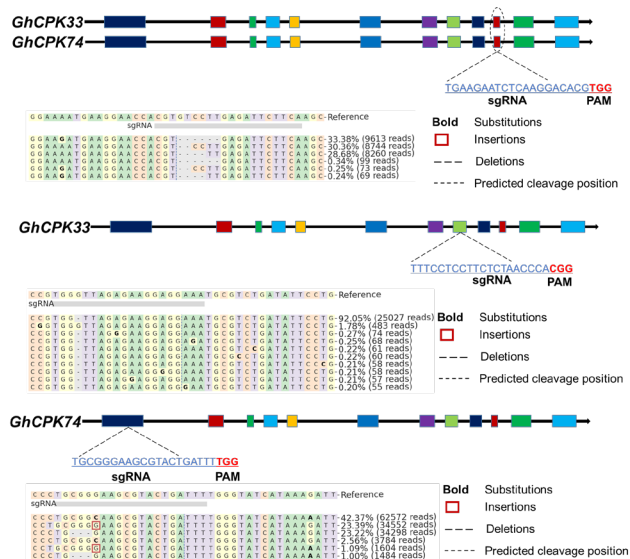

C

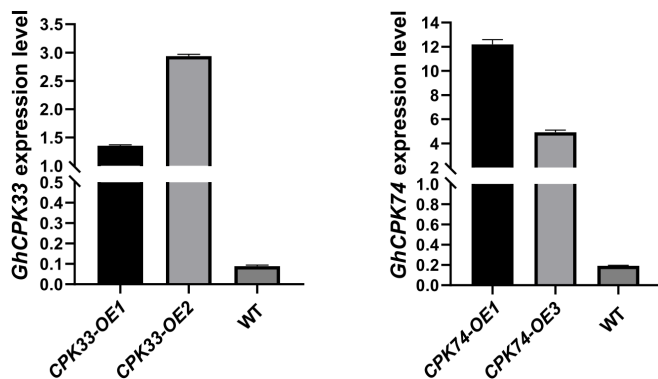

**Figure S12 Cultivation, gene editing and expression level detection of T2 generation *cpk33/74*, *cpk33*, *cpk74*, *CPK33-OE*, *CPK74-OE* and WT plants. (A) Cultivation of T2 generation *cpk33/74*, *cpk33*, *cpk74*, *CPK33-OE*, *CPK74-OE* and WT plants. (B) Detection of editing in T2 generation *cpk33*, *cpk74* and *cpk74/33* plants. (C) Detection of *GhCPK33* and *GhCPK74* expression levels in T2 generation *CPK33-OE* and *CPK74-OE* overexpression materials. The expression of *GhUB7* was used as internal control. Means  $\pm$  SE (n = 3).**



## Figure S13

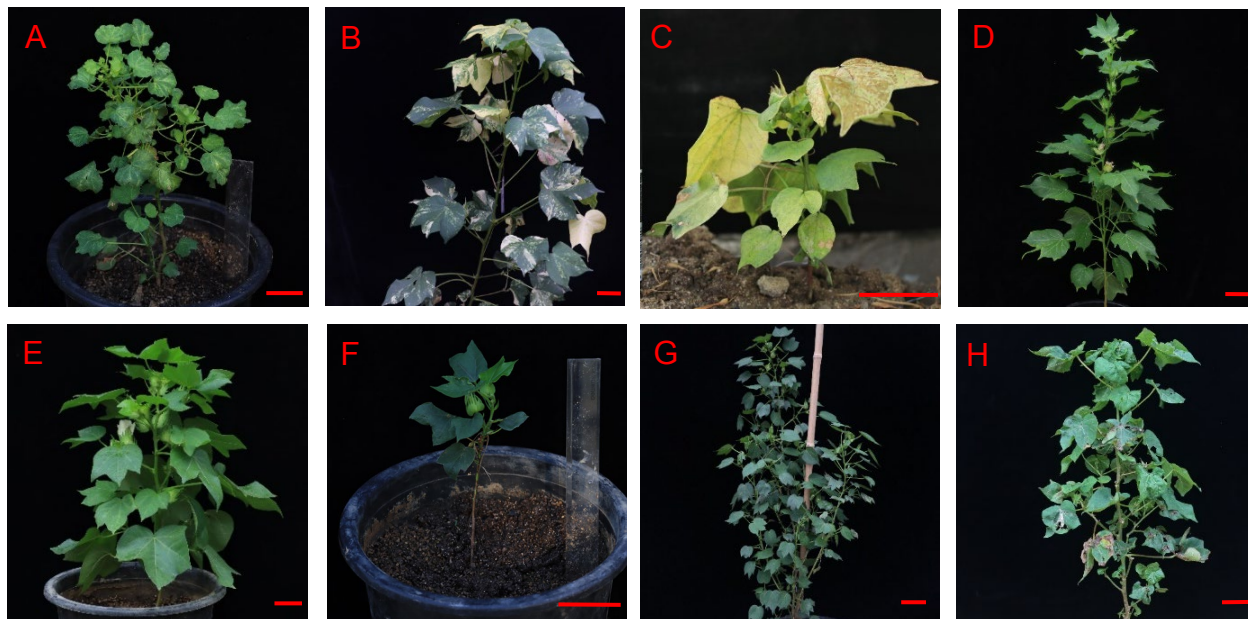

**Figure S13** Identification of unique phenotypes in the T0 generation *GhCPKs* mutant library plants. (A) The leaf is round. (B) The leaves showed chimeric yellowing. (C) The plant type is dwarfed and the leaves turn yellow. (D) The fruit branches become shorter. (E) Dwarfing and compact plants. (F) Plant dwarfing and early maturing. (G) The leaves become smaller. (H) Necrotic spots appeared on the leaves. The red line represents 5 cm.

Figure S14

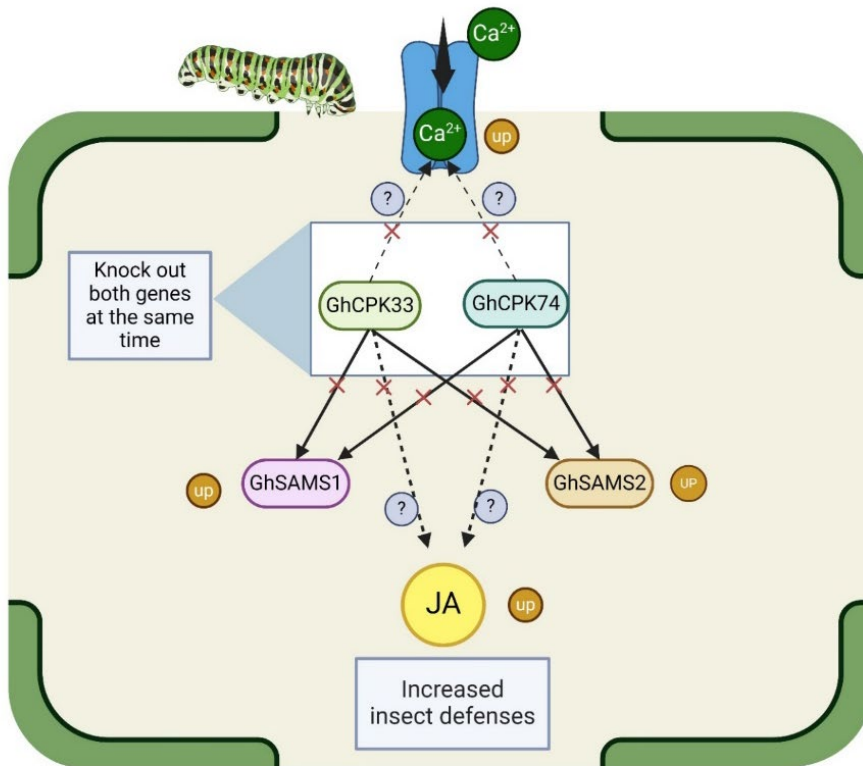

**Figure S14 Models of *GhCPK33* and *GhCPK74* regulating pest defense in upland cotton.** Under the induction of OS from the *S. litura*, simultaneously knocking out *GhCPK33* and *GhCPK74* can accelerate the influx of  $Ca^{2+}$  in cotton leaf mesophyll cells, enhance the synthesis of JA, and increase the expression of *GhSAMS1* and *GhSAMS2*, resulting in an increased defense capability of cotton against herbivorous insects.



|         |             |                   |                  |          |          |   |     |         |      |           |   |   |   |     |     |   |   |
|---------|-------------|-------------------|------------------|----------|----------|---|-----|---------|------|-----------|---|---|---|-----|-----|---|---|
| GhCPK66 | Gh_D09G1163 | Ghir_D09G012710.1 | D09              | 38278169 | 38281037 | - | 531 | 60227.3 | 6.76 | MGNCCVTS  | N | Y | 4 | III | M   | 0 | N |
| GhCPK67 | Gh_D09G1249 | Ghir_D09G013620.1 | D09              | 39552322 | 39555623 | - | 610 | 68213.9 | 4.96 | MGNNCFKT  | N | Y | 4 | I   | C M | 0 | N |
| GhCPK68 | Gh_D10G0130 | Ghir_D10G001600.1 | D10              | 1030951  | 1034394  | - | 551 | 62014.3 | 6.17 | MGCFSSKH  | Y | Y | 4 | II  | M   | 0 | N |
| GhCPK69 | Gh_D10G0863 | Ghir_D10G009490.1 | D10              | 10909734 | 10913532 | - | 544 | 61950.2 | 8.81 | MGICLSTT  | Y | Y | 4 | IV  | M   | 0 | N |
| GhCPK70 | Gh_D10G1303 | Ghir_D10G013990.1 | D10              | 24177574 | 24181997 | - | 495 | 56317.6 | 5.41 | MGSCISTQ  | Y | Y | 3 | III | M   | 0 | N |
| GhCPK71 | Gh_D10G2029 | Ghir_D10G021750.1 | D10              | 56010875 | 56015207 | - | 584 | 64984.3 | 5.14 | MGNTCVGP  | N | Y | 4 | I   | M   | 0 | N |
| GhCPK72 | Gh_D11G0227 | Ghir_D11G002390.1 | D11              | 1905499  | 1908419  | - | 530 | 60355.2 | 6.56 | MGN CNRPP | N | Y | 4 | II  | M   | 0 | N |
| GhCPK73 | Gh_D11G0314 | Ghir_D11G003360.1 | D11              | 2722348  | 2725395  | + | 550 | 62311.9 | 6.53 | MGN CNACV | N | Y | 4 | III | C M | 0 | N |
| GhCPK74 | Gh_D11G1774 | Ghir_D11G018640.1 | D11              | 19767240 | 19771544 | - | 554 | 62788.1 | 9.48 | MGACLSTT  | Y | Y | 4 | IV  | M   | 0 | N |
| GhCPK75 | Gh_D11G3329 | Ghir_D11G036410.1 | D11              | 66059614 | 66066098 | + | 527 | 59284.3 | 6.39 | MGNCCRSP  | N | Y | 4 | III | M   | 0 | N |
| GhCPK76 | Gh_D12G0121 | Ghir_D12G001340.1 | D12              | 1591928  | 1594742  | - | 575 | 64573.8 | 6.07 | MRLHYCMR  | N | Y | 4 | I   | N   | 0 | Y |
| GhCPK77 | Gh_D12G2743 | Ghir_D12G024580.1 | scaffold4587_D12 | 20270    | 23886    | - | 534 | 60242.7 | 6.39 | MGN CNSQP | Y | Y | 4 | II  | C M | 0 | N |
| GhCPK78 | Gh_D13G0033 | Ghir_D13G000300.1 | D13              | 246690   | 250046   | - | 573 | 64084.6 | 6.22 | MGNTCVGP  | N | Y | 3 | I   | M   | 0 | N |
| GhCPK79 | Gh_D13G0560 | Ghir_D13G005790.1 | D13              | 7586741  | 7589365  | - | 523 | 58400.4 | 6.41 | MGNTCLGS  | N | Y | 4 | I   | M   | 0 | N |
| GhCPK80 | Gh_D13G0561 | Ghir_D13G005800.1 | D13              | 7614829  | 7617628  | - | 487 | 54631   | 4.86 | MRR AIDHQ | N | N | 4 | I   | C   | 0 | N |
| GhCPK81 | Gh_D13G1455 | Ghir_D13G015090.1 | D13              | 45574159 | 45578015 | + | 536 | 60415.3 | 6.37 | MGGCLTKN  | Y | Y | 4 | II  | M   | 0 | N |
| GhCPK82 | Gh_D13G2278 | Ghir_D13G023730.1 | D13              | 58814168 | 58818344 | + | 461 | 51476   | 6.4  | MGN CTRG  | N | Y | 4 | II  | M   | 0 | N |

MW molecular weight, pI isoelectric points, M Cell membrane, C Cytoplasm, N nucleus

The myristoylation sites were predicted by the Myristoylator program (<http://web.expasy.org/myristoylator/>).

The palmitoylation sites were predicted by CPS-Palm (<http://lipid.biocuckoo.org/index.php>)

Number of EF-hands were predicted by SMART database (<http://smart.embl-heidelberg.de/>)

The subcellular localizatio were predicted by DeepLoc-2.0 (<https://services.healthtech.dtu.dk/services/DeepLoc-2.0/>)

The transmembrane domains were predicted by DeepTMHMM (<https://dtu.biolib.com/DeepTMHMM/>)

The signal peptides were predicted by SignalP-6 (<https://biolib.com/DTU/SignalP-6/>)



**Table S2 sgRNA of CDPK gene family mutant library in the *Gossypium hirsutum***

| sgRNA sequence                                | Targeted gene ID | Targeted gene name | sgRNA sequence                                 | Targeted gene ID            | Targeted gene name     |
|-----------------------------------------------|------------------|--------------------|------------------------------------------------|-----------------------------|------------------------|
| TCCTCTTCTCCGTTTCTGTG<br>TGGTGGAATTGGGGTTGAAC  | Gh_A01G0621      | GhCPK1             | ATCAAAGCTCACAGAGGCAG<br>CTCTCTGAAATAGAAGGCCA   | Gh_A01G0621 and Gh_D01G2360 | GhCPK1 and GhCPK44     |
| AATGAAGCAGACCATCTAGT<br>ACAAGGAAGGGTCCAAGACA  | Gh_A01G1119      | GhCPK2             | CTTTGCATCGAGAAAGGTAC<br>TGCTCGACAGAGATACGAAG   | Gh_A01G1119 and Gh_D01G1194 | GhCPK2 and GhCPK43     |
| GCAAGTTGTCCGCAACCACC<br>CCTTCCCTAAGTGTTTGAAT  | Gh_A02G0144      | GhCPK3             | CGACAAGTATCCATTCTCGT<br>AGAGACGGACTTCAGAAAAT   | Gh_A02G0144 and Gh_D02G0183 | GhCPK3 and GhCPK45     |
| GACAGCAGCAACCAAAGGAT<br>CGACAGCAGCAACCAAAGGA  | Gh_A02G0609      | GhCPK4             | CTTCAAGCGTGATAGCACGG<br>TGGAACATCAGGTTGTGCCT   | Gh_A02G0609 and Gh_D02G0663 | GhCPK4 and GhCPK46     |
| CAGTGGAACAATTAGCTTCG<br>ATTGCACCACAGATCATCAA  | Gh_A02G1029      | GhCPK5             | TGCAATGGTCTTCCGTCCAC<br>GGAAAGCAGCTAACTTGTGT   | Gh_A02G1029 and Gh_D03G0701 | GhCPK5 and Gh_D03G0701 |
| TCTTAGGGTAAAAGCACCAA<br>AGTGCACCGTGACATGAAAC  | Gh_A02G1635      | GhCPK6             | TGAGTATTCCGATTACCGGA<br>AACTCCGGAGGAACACTACGAA | Gh_A02G1635 and Gh_D03G0087 | GhCPK6 and GhCPK48     |
| GCAAGCTTAGGTAGAACTTA<br>TCACACCCAAGTTCATATCT  | Gh_A02G1796      | GhCPK7             | GTTCTAAATGATCCAACCTGG<br>AACAGCTTCTCATGAGAAGA  | Gh_A02G1796 and Gh_D03G0609 | GhCPK7 and GhCPK49     |
| GCAAATATGGAGAGATCCGT<br>CAGTCCATATTACGTTGCTC  | Gh_A03G1505      | GhCPK8             | ATAAGCATGAGAGATGCCCC<br>AGGCCAAGTTTTTACCGACG   | Gh_A03G1505 and Gh_D02G1973 | GhCPK8 and GhCPK47     |
| GTTGGACACAAGTATGTGAA<br>ATTCACAATTGCCCTGCACA  | Gh_A04G0148      | GhCPK9             | TGAGAAGTGAACCCAACAA<br>TGTCGAAAAGATGTTAACGC    | Gh_A04G0148 and Gh_D05G3567 | GhCPK9 and GhCPK59     |
| GAACAATGCCAATAAAGGCTT<br>GGTTGGAAGTCCATATTATG | Gh_A04G0467      | GhCPK10            | AAAGGCAGCTGCGCTTGCTA<br>GTAGCTATGATGCAAGACAC   | Gh_A04G0467 and Gh_D04G0900 | GhCPK10 and GhCPK52    |
| GTAGTAATGAACCAACCCGT<br>GAGGAAACTCAGAACTGCCG  | Gh_A04G0780      | GhCPK11            | TGGCTCTGAGGTTCTCAA<br>TGGAACCAGACCCAAAGCTC     | Gh_A04G0780 and Gh_D04G1271 | GhCPK11 and GhCPK53    |
| GGTCCTAAACCAGCCGAAGA<br>TTGCAGAAAAGTCTTCATG   | Gh_A04G1372      | GhCPK12            | GATCTTGTAAGAAGACCCT<br>GTTCCCTTCAGGCCATCCTT    | Gh_A04G1372 and Gh_D04G0895 | GhCPK12 and GhCPK51    |
| GTCGATATCGAAGACGAAGT<br>GCTAAGAAGAAGATGGTTGG  | Gh_A04G1429      | GhCPK13            | CTTTCTGCCTTATTTTCAGGA<br>GACGATTAAGGCACGTACG   | Gh_A04G1429 and Gh_D04G1486 | GhCPK13 and GhCPK54    |
| CGCTGCTTCTTTGCTTCGCA<br>GTCTAATATTGTCGAGCTCA  | Gh_A05G0617      | GhCPK14            | CTTACTTAGAACCTGCACTG<br>CTGAAGCACATAACCAAGAAG  | Gh_A05G0617 and Gh_D05G0748 | GhCPK14 and GhCPK55    |
| CTAACCACTGACAAGGACGT<br>GTTATTTGAATCACGGCCAA  | Gh_A05G1571      | GhCPK15            | GCTGATGCCTTGAATTCGAG<br>AGAGGAAAACATGAGCCGCG   | Gh_A05G1571 and Gh_D05G1749 | GhCPK15 and GhCPK56    |
| TTCAGCATAGCCGATGCCTT<br>TGTTGGGTCTTTCATTCCAA  | Gh_A05G2355      | GhCPK16            | CATAGCAGAGAGACTCTCTG<br>GATAATACAGCGGAATCCAG   | Gh_A05G2355 and Gh_D05G2622 | GhCPK16 and GhCPK57    |
| TAACATAAGACAACGTACCG<br>ATCCAAAGCCAAGCTGCGGA  | Gh_A05G2859      | GhCPK17            | TCGTTGGAGGAGCTTAAAGA<br>TTTGTCCAGGATGGTAATACG  | Gh_A05G2859 and Gh_D05G3156 | GhCPK17 and GhCPK58    |
| GGGTTCTGAACTTATGGAAT<br>GTTCCGAGTGACGGCAAATG  | Gh_A05G3246      | GhCPK18            | CAGTTTATTCAAGTGCACCG<br>GAAAGGGAAGAGAATCTGGT   | Gh_A05G3246 and Gh_D04G0366 | GhCPK18 and GhCPK50    |
| GATTTGTTGGACAGGATGGG<br>ACAGAAGCAAGCCCGATTGA  | Gh_A06G0013      | GhCPK19            | CATCAAGCAAATAATCTCCG<br>ACATAGCACCCGAAGTTCTT   | Gh_A06G1772 and Gh_D06G2206 | GhCPK20 and GhCPK60    |

|                                               |             |         |                                               |                             |                     |
|-----------------------------------------------|-------------|---------|-----------------------------------------------|-----------------------------|---------------------|
| AGTGAGGAAGATGTTGACAA<br>CTTGTTTTGTTGGCTAATGG  | Gh_A06G1772 | GhCPK20 | GATGCGCCAAAGCAAGCAGA<br>GATTACTAACCTGCCAGAA   | Gh_A07G1099 and Gh_D07G1198 | GhCPK21 and GhCPK61 |
| GCAGAAGGTTACACCACAGC<br>GATGAACTCATCGTAGTCTA  | Gh_A07G1099 | GhCPK21 | TTGTGTACTGATCCCAACTC<br>GAAGGAAGCTTCCCCCTGA   | Gh_A07G1123 and Gh_D07G1228 | GhCPK22 and GhCPK62 |
| GCTAACATTGGCCAGACGAG<br>GCAAACAAGAACATCCACAA  | Gh_A07G1123 | GhCPK22 | ACCATAGATTCCGATAACAG<br>GGTCATTGCAGGATGTTTAT  | Gh_A08G2530 and Gh_D08G0142 | GhCPK23 and GhCPK63 |
| CACTTCGACAAAGACAATAG<br>GTATGGCACGTTTCATGATGT | Gh_A08G2530 | GhCPK23 | GAAAAGGAAACCCAAAGAGG<br>TGAGAAAAGGAAACCCAAAG  | Gh_A09G1033 and Gh_D09G1054 | GhCPK24 and GhCPK64 |
| CTTCACCTGTAAGAGATCCA<br>GGGGAGGCTGTATTATTCCT  | Gh_A09G1033 | GhCPK24 | GCTGAAGAAGAGAGCACTAA<br>TTGTCAGTTGAGGAAGTAGC  | Gh_A09G1067 and Gh_D09G1074 | GhCPK25 and GhCPK65 |
| CAAGGGGACACTACACTGAA<br>TGGAGATGTTTTGGTTCAAG  | Gh_A09G1067 | GhCPK25 | AGTGGATGTTTGGAGTGCTG<br>TGATTGTTGAACGTGCAGGA  | Gh_A09G1157 and Gh_D09G1163 | GhCPK26 and GhCPK66 |
| TGAGGAACTAAGAGATGAGT<br>AGATGAGTTGGCTGATGAGC  | Gh_A09G1157 | GhCPK26 | CATCAGCCTGAACCCAACTG<br>CCTAGGACTAAAGAATCAAG  | Gh_A09G1248 and Gh_D09G1249 | GhCPK27 and GhCPK67 |
| TGGTGAACCTGACTTCACAT<br>CATCAGCCTGAACCCAACTG  | Gh_A09G1248 | GhCPK27 | AGACAAGCCAATAGGTAGCG<br>GGACGGGAGAATTAACTACG  | Gh_A10G0124 and Gh_D10G0130 | GhCPK28 and GhCPK68 |
| GGTGGATGAAGCCAGCATCA<br>TAGCAGCAAGCATAAATTGC  | Gh_A10G0124 | GhCPK28 | GCAGCAGTCAGTCTAGCCCCG<br>CTGTCACTAATTGTTGGCCA | Gh_A10G0886 and Gh_D10G0863 | GhCPK29 and GhCPK69 |
| CCATTCATGACGTGAACCAT<br>TTAGAGGCCCTGAAAGGCCA  | Gh_A10G0886 | GhCPK29 | GCTCTACTACAAGACGACCC<br>ATGATAGATCCGGTACCAAA  | Gh_A10G1195 and Gh_D10G1303 | GhCPK30 and GhCPK70 |
| TCGAAGATATTCTTCCCCGA<br>AAGTGGAACTAAGCTACG    | Gh_A10G1195 | GhCPK30 | AGGAGCTTATGAGGATGCAG<br>GGAAGCTTGCCATTCTTTGG  | Gh_A10G1756 and Gh_D10G2029 | GhCPK31 and GhCPK71 |
| TAAACCAGAGACCAAACAAG<br>CGGTGCGTATGTGCATTAGC  | Gh_A10G1756 | GhCPK31 | GATGCTACGACAAGATCCCA<br>TACGACAAGATCCCAAGGAA  | Gh_A11G0213 and Gh_D11G0227 | GhCPK32 and GhCPK72 |
| TTCCGACCAGAATCGGACAC<br>TATCTTTCAGGTCTGCAGGA  | Gh_A11G0213 | GhCPK32 | TGAAGAATCTCAAGGACACG<br>TTGCAGTTCGTAGAAGTCGG  | Gh_A11G1615 and Gh_D11G1774 | GhCPK33 and GhCPK74 |
| TTTCCTCCTTCTCTAACCCA<br>AGCTTCTCCAGCACACCCCGT | Gh_A11G1615 | GhCPK33 | TTTCACGTCTTCTCTTGCAA<br>TTACACTGAAAGAGCTGCCG  | Gh_A11G2941 and Gh_D11G3329 | GhCPK34 and GhCPK75 |
| GTAAACATCCTGTCAGCGTC<br>TACCTCGTGGATCGCAAGCT  | Gh_A11G2941 | GhCPK34 | ACATTATAGCAACCTCGCGT<br>TGTTCGGCAGATGTTAGAAC  | Gh_A11G3011 and Gh_D11G0314 | GhCPK35 and GhCPK73 |
| AGGTAATGCCAAACTCACCT<br>GAGTCACCGAACACGAATAG  | Gh_A11G3011 | GhCPK35 | TCCATGGATTTCCCAAAACG<br>GAATCGAAGACGAACCATG   | Gh_A12G0109 and Gh_D12G0121 | GhCPK36 and GhCPK76 |
| CAAGCATTACGGACCAGAAG<br>ATAGTGGGAGCATCGATTAT  | Gh_A12G0109 | GhCPK36 | ATGTAGTCCAGAAGTATTG<br>TTTGTGCCGGCAGATCGTGA   | Gh_A12G2686 and Gh_D12G2743 | GhCPK37 and GhCPK77 |
| ACCGTGTTCCTTACAGGA<br>TCCATCCTGTAGGAAGAACA    | Gh_A12G2686 | GhCPK37 | CTAAGCCTCCTCATGTGAAG<br>ATATTGACCAAGTCTTGCA   | Gh_A13G0017 and Gh_D13G0033 | GhCPK38 and GhCPK78 |
| TAGCGGCACAATTGATTATG<br>TCTTGCCTAGTCTCCGATTT  | Gh_A13G0017 | GhCPK38 | GAGCTGTCAACCGTTCTGAA<br>AGGAACTGTAACAGCGGGA   | Gh_A13G0563 and Gh_D13G0560 | GhCPK39 and GhCPK79 |
| TGTGCATTCACCCTTCAGAA<br>TTGACTTCAGCTCTTACCCA  | Gh_A13G0563 | GhCPK39 | CCTCAATAAACTAGAACGCG<br>TGGCTTGCAGAAATGTTTA   | Gh_A13G0566 and Gh_D13G0561 | GhCPK40 and GhCPK80 |

|                                                                                                                                                                                                                                                                                                                                                                                                                                                                                                                                                                                                                                                                                                                                                                                                                                                                                                                                                                                              |                                                                                                                                                                                                                                                                                                          |                                                                                                                                                                                                                          |                                                                                              |                                                            |                                            |
|----------------------------------------------------------------------------------------------------------------------------------------------------------------------------------------------------------------------------------------------------------------------------------------------------------------------------------------------------------------------------------------------------------------------------------------------------------------------------------------------------------------------------------------------------------------------------------------------------------------------------------------------------------------------------------------------------------------------------------------------------------------------------------------------------------------------------------------------------------------------------------------------------------------------------------------------------------------------------------------------|----------------------------------------------------------------------------------------------------------------------------------------------------------------------------------------------------------------------------------------------------------------------------------------------------------|--------------------------------------------------------------------------------------------------------------------------------------------------------------------------------------------------------------------------|----------------------------------------------------------------------------------------------|------------------------------------------------------------|--------------------------------------------|
| CAGCCAAATGGTGCATAATT<br>TATGTACCGAGATTTGCGACT<br>GTGTTAACATCCTGCAGACT<br>AACATCGATACTGACAACAG<br>ATAGGGCAAGCAATGAACAG<br>TTGGTGATGGAATTGTGCGG<br>CTTGCAAGTCGATCGCGAAA<br>CGTGCTCTAATGCAGGCCGT<br>AGATCAACTACGAGGAGTTC<br>CCTGATTAAGATGGAAGGTA<br>CAGAAAATCGGTCACTCTGT<br>CAGAAAATCGGTCACTCTGT<br>TCAACCGTAAAATGAGCGGA<br>CCGACGACAACAGCAACCAA<br>AGCTGAAAGTCTTTCCGAGG<br>ACTTCGGGAGCAACGTAATA<br>CACTTACGTTGCAATAGACA<br>TAGCAGTTCGTAAAAGCCGT<br>GGTCAACATCACCATGGCAA<br>GGATGACAATGCAGTCCATT<br>GCGTTCGGGGTGAAGTCAA<br>TCAATTTGGGAGACGCGTTC<br>TGGCTTAGGGTCTCTTCTCC<br>CCTGTCTGTGCAATAAGCAA<br>GGAAGGGAACAATGCCAAAA<br>AAGGGCAGCTGCACTTGCTA<br>ACAAAAACCATGTCATTGGG<br>CGATCTCGAAGAGGAAACTC<br>TGTGTACAGAGCTTTCCACG<br>GTCGATATCGAAGAGGAAGT<br>CATATAACTGCGTTGTCAAG<br>CAGAGCTTGCTCTAGTTCTT<br>GGTTTCTTCAAGTTGAACAC<br>GATAAACCTGAATGAAAGCG<br>GTCTTTCATTCCAAACGCAT<br>TGGTTGTTGCTGAATTGTGG<br>TCCCAATCCTCAATCCCGGA<br>TGAGGTTCAAATGTTGATGC<br>TGAAAGAGCAGCTGCTTCCA<br>GAAAGAGCAGCTGCTTCCAT | Gh_A13G0566<br>Gh_A13G1164<br>Gh_A13G1891<br>Gh_D01G1194<br>Gh_D01G2360<br>Gh_D02G0183<br>Gh_D02G0663<br>Gh_D02G1973<br>Gh_D03G0087<br>Gh_D03G0609<br>Gh_D04G0366<br>Gh_D04G0895<br>Gh_D04G0900<br>Gh_D04G1271<br>Gh_D04G1486<br>Gh_D05G0748<br>Gh_D05G1749<br>Gh_D05G2622<br>Gh_D05G3156<br>Gh_D05G3567 | GhCPK40<br>GhCPK41<br>GhCPK42<br>GhCPK43<br>GhCPK44<br>GhCPK45<br>GhCPK46<br>GhCPK47<br>GhCPK48<br>GhCPK49<br>GhCPK50<br>GhCPK51<br>GhCPK52<br>GhCPK53<br>GhCPK54<br>GhCPK55<br>GhCPK56<br>GhCPK57<br>GhCPK58<br>GhCPK59 | CAGCCTGCAAAAATAAAACCG<br>CTATCTGATAACAAGCCCGG<br>AAGGAGGTTAACAGTGCCC<br>ACACTTGAAGAAGTCAAGCA | Gh_A13G1164 and Gh_D13G1455<br>Gh_A13G1891 and Gh_D13G2278 | GhCPK41 and GhCPK81<br>GhCPK42 and GhCPK82 |
|----------------------------------------------------------------------------------------------------------------------------------------------------------------------------------------------------------------------------------------------------------------------------------------------------------------------------------------------------------------------------------------------------------------------------------------------------------------------------------------------------------------------------------------------------------------------------------------------------------------------------------------------------------------------------------------------------------------------------------------------------------------------------------------------------------------------------------------------------------------------------------------------------------------------------------------------------------------------------------------------|----------------------------------------------------------------------------------------------------------------------------------------------------------------------------------------------------------------------------------------------------------------------------------------------------------|--------------------------------------------------------------------------------------------------------------------------------------------------------------------------------------------------------------------------|----------------------------------------------------------------------------------------------|------------------------------------------------------------|--------------------------------------------|

|                       |             |         |
|-----------------------|-------------|---------|
| TTAGTTTCGAAAACGACCCA  | Gh_D06G2206 | GhCPK60 |
| TGACGATGGACCCGAATGAG  |             |         |
| GTGTTGTGTAGGTGATTGCG  | Gh_D07G1198 | GhCPK61 |
| ATCACCAACCCACTGAATAG  |             |         |
| TGCTCTTTGTAACAGGTGAA  | Gh_D07G1228 | GhCPK62 |
| GCACTTCACCCATATTATGT  |             |         |
| AATGTTCTTCCCGATCCATT  | Gh_D08G0142 | GhCPK63 |
| TGATGTAATGTTGACAATT   |             |         |
| GAAGAAGCCAAGAGTCCTAA  | Gh_D09G1054 | GhCPK64 |
| TAGTGCTTGCTCTAGTTCTT  |             |         |
| TATGCAAGAGAATGAACGAG  | Gh_D09G1074 | GhCPK65 |
| AGGTTGATGTCTGGAGTGCT  |             |         |
| GTCACATTACTCAGAACCAG  | Gh_D09G1163 | GhCPK66 |
| AGATGAGTTGGCTGATGAGC  |             |         |
| ACAGACTGCTATAAAGAACG  | Gh_D09G1249 | GhCPK67 |
| AATCCTGAAGTTGGTAAGAG  |             |         |
| TAGCAGCAAACATAAACCGT  | Gh_D10G0130 | GhCPK68 |
| GCTATGAAGGAGTATGGAAT  |             |         |
| GTTGCCATAGGCAATGAAAA  | Gh_D10G0863 | GhCPK69 |
| GGATACACCTACGTTGCCAT  |             |         |
| TTTCCCCCAGATTAACGTTG  | Gh_D10G1303 | GhCPK70 |
| CTACGACGAGTTCACAACAA  |             |         |
| GAAGTCGGACTGAAAAGAGT  | Gh_D10G2029 | GhCPK71 |
| CTTGCAAATCGATTGCAAAG  |             |         |
| TCATTATGATGGGTACCGCC  | Gh_D11G0227 | GhCPK72 |
| CATTATGATGGGTACCGCCT  |             |         |
| AAAGAGTCCCACAGAAACAG  | Gh_D11G0314 | GhCPK73 |
| AGCTCGGCCGAGGTGAATTT  |             |         |
| AAATCAGTACGCTTCCCGCA  | Gh_D11G1774 | GhCPK74 |
| CGTGGTTCCTTCATCTTCCA  |             |         |
| GACGTGAAATCGAATTTCTC  | Gh_D11G3329 | GhCPK75 |
| CGTGCTTGCAGGAGTTCCAA  |             |         |
| CAAGCATTACGGACCGGAGG  | Gh_D12G0121 | GhCPK76 |
| TAGCGGGAGCATCGATTACG  |             |         |
| TTGATTTTCGCATCAGATCCA | Gh_D12G2743 | GhCPK77 |
| TAAGTGTTCTTCCCTACAGGA |             |         |
| AATCTGTTTCAGCCGTAATG  | Gh_D13G0033 | GhCPK78 |
| ATAGCGGCACAATGATTATG  |             |         |
| GGCGAATGCACAACATCTTT  | Gh_D13G0560 | GhCPK79 |
| GGATGTGGAGGATGCTAGGA  |             |         |



|                      |             |         |
|----------------------|-------------|---------|
| GGCCTAAAGTGTAAGCTCA  | Gh_D13G0561 | GhCPK80 |
| TATGTACCGAGATTTGACC  |             |         |
| GTGCCAAGGATCTAGTCTGC | Gh_D13G1455 | GhCPK81 |
| ATTGTTGGCCAGAAACATGC |             |         |
| ATCGGAAAAGAACTAGGTCG | Gh_D13G2278 | GhCPK82 |
| AACTAGGTCGTGGTCAATTT |             |         |

**Table S3 Primers for constructing the vector mixing pool**

| Downstream primer                                    | Primer name | Upstream primer                       | Primer name |
|------------------------------------------------------|-------------|---------------------------------------|-------------|
| ttctagctctaaaacCACAGAAACGGAGAAGAGGAtgcaccagccgggaat  | GhCPK1      | AAGCATCAGATGggcaAACAAAGCACCAGTGGTCTAG | pRGEB32-7S  |
| ttctagctctaaaacGTTCAACCCCAATTCCACCAAtgcaccagccgggaat | GhCPK2      |                                       |             |
| ttctagctctaaaacACTAGATGGTCTGCTTCATtgcaccagccgggaat   | GhCPK3      |                                       |             |
| ttctagctctaaaacTGTCTTGGACCCTTCCTTGTtgcaccagccgggaat  | GhCPK4      |                                       |             |
| ttctagctctaaaacGGTGGTTGCCGACAACCTTGtgcaccagccgggaat  | GhCPK5      |                                       |             |
| ttctagctctaaaacATTCAAACACTTAGGGAAGGtgcaccagccgggaat  | GhCPK6      |                                       |             |
| ttctagctctaaaacATCCTTTGGTTGCTGCTGTtgcaccagccgggaat   | GhCPK7      |                                       |             |
| ttctagctctaaaacTCCTTTGGTTGCTGCTGTCGtgcaccagccgggaat  | GhCPK8      |                                       |             |
| ttctagctctaaaacCGAAGCTAATTGTTCCACTGtgcaccagccgggaat  | GhCPK9      |                                       |             |
| ttctagctctaaaacTTGATGATCTGTGGTGCAAtgcaccagccgggaat   | GhCPK10     |                                       |             |
| ttctagctctaaaacTTGGTGCTTTTACCCTAAGAtgcaccagccgggaat  | GhCPK11     |                                       |             |
| ttctagctctaaaacGTTTCATGTACGGTGCACtgcaccagccgggaat    | GhCPK12     |                                       |             |
| ttctagctctaaaacTAAGTTCTACCTAAGCTTGtgcaccagccgggaat   | GhCPK13     |                                       |             |
| ttctagctctaaaacAGATATGAACTTGGGTGTGAtgcaccagccgggaat  | GhCPK14     |                                       |             |
| ttctagctctaaaacACGGATCTCTCCATATTTGtgcaccagccgggaat   | GhCPK15     |                                       |             |
| ttctagctctaaaacGAGCAACGTAATATGGACTGtgcaccagccgggaat  | GhCPK16     |                                       |             |
| ttctagctctaaaacTTCACATACTTGTGTCCAACtgcaccagccgggaat  | GhCPK17     |                                       |             |
| ttctagctctaaaacTGTGCAGGGCAATTGTGAAtgcaccagccgggaat   | GhCPK18     |                                       |             |
| ttctagctctaaaacATAATCGATGCTCCACTAtgcaccagccgggaat    | GhCPK19     |                                       |             |
| ttctagctctaaaacCATAATATGGACTTCCAACtgcaccagccgggaat   | GhCPK20     |                                       |             |
| ttctagctctaaaacACGGGTTGGTTCATTACTAtgcaccagccgggaat   |             |                                       |             |
| ttctagctctaaaacCGGCAGTTCTGAGTTTCTCtgcaccagccgggaat   |             |                                       |             |
| ttctagctctaaaacTCTTCGGCTGGTTTAGGACCtgcaccagccgggaat  |             |                                       |             |
| ttctagctctaaaacCATGAAGCAGTTTTCTGCAAtgcaccagccgggaat  |             |                                       |             |
| ttctagctctaaaacACTTCGTCTTCGATATCGACtgcaccagccgggaat  |             |                                       |             |
| ttctagctctaaaacCCAACCATCTTCTTAGCtgcaccagccgggaat     |             |                                       |             |
| ttctagctctaaaacTGCGAAGCAAAGAAGCAGCGtgcaccagccgggaat  |             |                                       |             |
| ttctagctctaaaacTGAGCTCGACAATATTAGACtgcaccagccgggaat  |             |                                       |             |
| ttctagctctaaaacACGTCCTTGTGAGTGGTTAGtgcaccagccgggaat  |             |                                       |             |
| ttctagctctaaaacTTGGCCGTGATTCAAATAACtgcaccagccgggaat  |             |                                       |             |
| ttctagctctaaaacAAGGCATCGGCTATGCTGAAtgcaccagccgggaat  |             |                                       |             |
| ttctagctctaaaacTTGGAATGAAAGACCCAACAtgcaccagccgggaat  |             |                                       |             |
| ttctagctctaaaacCGGTACGTTGTCTTATGTTAtgcaccagccgggaat  |             |                                       |             |
| ttctagctctaaaacTCCGCAGCTTGGCTTTGGATtgcaccagccgggaat  |             |                                       |             |
| ttctagctctaaaacATTCCATAAGTTCAGAACCCtgcaccagccgggaat  |             |                                       |             |
| ttctagctctaaaacCATTTGCCGTCCTCCGAACtgcaccagccgggaat   |             |                                       |             |
| ttctagctctaaaacCCCATCCTGTCCAACAAATCtgcaccagccgggaat  |             |                                       |             |

|                                                      |         |
|------------------------------------------------------|---------|
| ttctagctctaaaacTCAATCGGGCTTGCTTCTGTgcaccagccgggaat   | GhCPK17 |
| ttctagctctaaaacTTGTCAACATCTTCCCTCACTgcaccagccgggaat  | GhCPK20 |
| ttctagctctaaaacCCATTAGCCAACAAAACAAGTgcaccagccgggaat  | GhCPK21 |
| ttctagctctaaaacGCTGGTGGTGAACCTTCTGCTgcaccagccgggaat  | GhCPK22 |
| ttctagctctaaaacTAGACTACGATGAGTTCATCgcaccagccgggaat   | GhCPK23 |
| ttctagctctaaaacCTCGTCTGGCCAATGTTAGCgcaccagccgggaat   | GhCPK24 |
| ttctagctctaaaacTTGTGGATGTTCTTGTGTTGCTgcaccagccgggaat | GhCPK25 |
| ttctagctctaaaacCTATTGTCTTTGTCTGAAGTgcaccagccgggaat   | GhCPK26 |
| ttctagctctaaaacACATCATGAACGTGCCATACgcaccagccgggaat   | GhCPK27 |
| ttctagctctaaaacTGGATCTCTTACAGGTGAAGTgcaccagccgggaat  | GhCPK28 |
| ttctagctctaaaacAGGAATAATACAGCCTCCCCgcaccagccgggaat   | GhCPK29 |
| ttctagctctaaaacTTCAGTGTAGTGTCCCCTTgcaccagccgggaat    | GhCPK30 |
| ttctagctctaaaacCTTGAACCAAAACATCTCCATgcaccagccgggaat  | GhCPK31 |
| ttctagctctaaaacACTCATCTCTTAGTTCCTCAgcaccagccgggaat   | GhCPK32 |
| ttctagctctaaaacGCTCATCAGCCAACCTCATCTgcaccagccgggaat  | GhCPK33 |
| ttctagctctaaaacATGTGAAGTCAGGTTACCAgcaccagccgggaat    | GhCPK34 |
| ttctagctctaaaacATAATCGATGCTCCCCTATgcaccagccgggaat    | GhCPK35 |
| ttctagctctaaaacTGATGCTGGCTTCATCCACCGgcaccagccgggaat  | GhCPK36 |
| ttctagctctaaaacGCAATTTATGCTTGCTGCTAgcaccagccgggaat   | GhCPK37 |
| ttctagctctaaaacATGGTTCACGTCATGAATGGgcaccagccgggaat   | GhCPK38 |
| ttctagctctaaaacTGGCCTTTCAGGGCCTCTAATgcaccagccgggaat  |         |
| ttctagctctaaaacTCGGGGAAGAATATCTTCGATgcaccagccgggaat  |         |
| ttctagctctaaaacCGTAGCTTAGTGTCCACTTgcaccagccgggaat    |         |
| ttctagctctaaaacCTTGTTTGGTCTCTGGTTTAtgcaccagccgggaat  |         |
| ttctagctctaaaacGCTAATGCACATACGCACCGgcaccagccgggaat   |         |
| ttctagctctaaaacGTGTCCGATTCTGGTCGGAAgcaccagccgggaat   |         |
| ttctagctctaaaacTCCTGCAGACCTGAAAGATgcaccagccgggaat    |         |
| ttctagctctaaaacTGGGTTAGAGAAGGAGGAAAtgcaccagccgggaat  |         |
| ttctagctctaaaacACGGGTGTGCTGGAGAAGCTgcaccagccgggaat   |         |
| ttctagctctaaaacGACGCTGACAGGATGTTTACTgcaccagccgggaat  |         |
| ttctagctctaaaacAGCTTGCGATCCACGAGGTAgcaccagccgggaat   |         |
| ttctagctctaaaacAGGTGAGTTTGGCATTACCTgcaccagccgggaat   |         |
| ttctagctctaaaacCTATTCGTGTTCCGGTGACTCgcaccagccgggaat  |         |
| ttctagctctaaaacCTTCTGGTCCGTAATGCTTgcaccagccgggaat    |         |
| ttctagctctaaaacATAATCGATGCTCCCCTATgcaccagccgggaat    |         |
| ttctagctctaaaacTCCTGTAGGAAGAACACGGTgcaccagccgggaat   |         |
| ttctagctctaaaacTGTTCTTCCCTACAGGATGGAtgcaccagccgggaat |         |
| ttctagctctaaaacCATAATCAATTGTGCCGCTAgcaccagccgggaat   |         |
| ttctagctctaaaacAAATCGGAGACTAGGCAAGAtgcaccagccgggaat  |         |

|                                      |                   |         |
|--------------------------------------|-------------------|---------|
| ttctagctctaaaacTTCTGAAGGGTGAATGCACA  | Atgcaccagccgggaat | GhCPK39 |
| ttctagctctaaaacTGGGTAAGAGCTGAAGTCA   | Atgcaccagccgggaat | GhCPK40 |
| ttctagctctaaaacAATTATGCACCATTTGGCTG  | tgcaccagccgggaat  | GhCPK41 |
| ttctagctctaaaacAGTCGAAATCTCGGTACAT   | Atgcaccagccgggaat | GhCPK42 |
| ttctagctctaaaacAGTCTGCAGGATGTTAACAC  | Tgcaccagccgggaat  | GhCPK43 |
| ttctagctctaaaacCTGTTGTCAGTATCGATGTT  | tgcaccagccgggaat  | GhCPK44 |
| ttctagctctaaaacCTGTTTCATTGCTTGCCCTAT | tgcaccagccgggaat  | GhCPK45 |
| ttctagctctaaaacCCGCACAATTCCATCACCA   | Atgcaccagccgggaat | GhCPK46 |
| ttctagctctaaaacTTTCGCGATCGACTTGCAAG  | Tgcaccagccgggaat  | GhCPK47 |
| ttctagctctaaaacACGGCCTGCATTAGAGCACG  | Tgcaccagccgggaat  | GhCPK48 |
| ttctagctctaaaacGAACTCCTCGTAGTTGATCT  | tgcaccagccgggaat  | GhCPK49 |
| ttctagctctaaaacTACCTTCCATCTTAATCAGG  | Tgcaccagccgggaat  | GhCPK50 |
| ttctagctctaaaacACAGAGTGACCGATTTTCTG  | Tgcaccagccgggaat  | GhCPK51 |
| ttctagctctaaaacACAGAGTGACCGATTTTCTG  | Tgcaccagccgggaat  | GhCPK52 |
| ttctagctctaaaacTCCGCTCATTTTACGGTTG   | Atgcaccagccgggaat | GhCPK53 |
| ttctagctctaaaacTTGGTTGCTGTTGTCGTCG   | Gtgcaccagccgggaat | GhCPK54 |
| ttctagctctaaaacCCTCGGAAAGACTTTCAGCT  | Tgcaccagccgggaat  | GhCPK55 |
| ttctagctctaaaacTATTACGTTGCTCCCGAAG   | Tgcaccagccgggaat  | GhCPK56 |
| ttctagctctaaaacTGTCTATTGCAACGTAAGT   | Gtgcaccagccgggaat | GhCPK57 |
| ttctagctctaaaacACGGCTTTTACGAACTGCT   | Atgcaccagccgggaat | GhCPK58 |
| ttctagctctaaaacTTGCCATGGTGATGTTGACC  | Tgcaccagccgggaat  |         |
| ttctagctctaaaacAATGGACTGCATTGTCATCC  | Tgcaccagccgggaat  |         |
| ttctagctctaaaacTTTGACTTCACCCCGAACG   | Ctgcaccagccgggaat |         |
| ttctagctctaaaacGAACGCGTCTCCCAAATTG   | Atgcaccagccgggaat |         |
| ttctagctctaaaacGGAGAAGAGACCCTAAGCC   | Atgcaccagccgggaat |         |
| ttctagctctaaaacTTGCTTATTGCACAGACAG   | Gtgcaccagccgggaat |         |
| ttctagctctaaaacTTTTGGCATTGTTCCCTTCC  | Tgcaccagccgggaat  |         |
| ttctagctctaaaacTAGCAAGTGCAGCTGCCCTT  | Tgcaccagccgggaat  |         |
| ttctagctctaaaacCCCAATGACATGGTTTTTGT  | Tgcaccagccgggaat  |         |
| ttctagctctaaaacGAGTTTCCTCTTCGAGATCG  | Tgcaccagccgggaat  |         |
| ttctagctctaaaacCGTGGAAAGCTCTGTACACA  | Tgcaccagccgggaat  |         |
| ttctagctctaaaacACTTCCTCTTCGATATCGAC  | Tgcaccagccgggaat  |         |
| ttctagctctaaaacCTTGACAACGCAGTTATATG  | Tgcaccagccgggaat  |         |
| ttctagctctaaaacAAGAAGTACAGCAAGCTCTG  | Tgcaccagccgggaat  |         |
| ttctagctctaaaacGTGTTCAACTTGAAGAAACC  | Tgcaccagccgggaat  |         |
| ttctagctctaaaacCGCTTTCATTCAGGTTTATC  | Tgcaccagccgggaat  |         |
| ttctagctctaaaacATGCGTTTGGAAATGAAAGAC | Tgcaccagccgggaat  |         |
| ttctagctctaaaacCCACAATTCAGCAACAACC   | Atgcaccagccgggaat |         |
| ttctagctctaaaacTCCGGGATTGAGGATTGGG   | Atgcaccagccgggaat |         |



|                                      |                |         |
|--------------------------------------|----------------|---------|
| ttctagctctaaaacGCATCAACATTTGAACCTCA  | gaccagccgggaat | GhCPK58 |
| ttctagctctaaaacTGGAAGCAGCTGCTCTTTC   | gaccagccgggaat | GhCPK59 |
| ttctagctctaaaacATGGAAGCAGCTGCTCTTTC  | gaccagccgggaat | GhCPK60 |
| ttctagctctaaaacTGGGTCGTTTTCGAACTAA   | gaccagccgggaat | GhCPK61 |
| ttctagctctaaaacCTCATTCCGGGTCCATCGTC  | gaccagccgggaat | GhCPK62 |
| ttctagctctaaaacCGCAATCACCTACACAACAC  | gaccagccgggaat | GhCPK63 |
| ttctagctctaaaacCTATTCAGTGGGTTGGTGAT  | gaccagccgggaat | GhCPK64 |
| ttctagctctaaaacTTCACCTGTTACAAAGAGCA  | gaccagccgggaat | GhCPK65 |
| ttctagctctaaaacACATAATATGGGTGAAGTGC  | gaccagccgggaat | GhCPK66 |
| ttctagctctaaaacAATGGATCGGGAAGAACATT  | gaccagccgggaat | GhCPK67 |
| ttctagctctaaaacAATTGTCTGAACATTACATCA | gaccagccgggaat | GhCPK68 |
| ttctagctctaaaacTTAGGACTCTTGGCTTCTTC  | gaccagccgggaat | GhCPK69 |
| ttctagctctaaaacAAGAAGTAGAGCAAGCACTA  | gaccagccgggaat | GhCPK70 |
| ttctagctctaaaacCTCGTTCATTCTCTTGCATA  | gaccagccgggaat | GhCPK71 |
| ttctagctctaaaacAGCACTCCAGACATCAACCT  | gaccagccgggaat | GhCPK72 |
| ttctagctctaaaacCTGGTTCTGAGTAATGTGACT | gaccagccgggaat | GhCPK73 |
| ttctagctctaaaacGTCATCAGCCAACCTCATCT  | gaccagccgggaat | GhCPK74 |
| ttctagctctaaaacCGTTCCTTATAGCAGTCTGT  | gaccagccgggaat | GhCPK75 |
| ttctagctctaaaacCTCTTACCAACTTCAGGATT  | gaccagccgggaat | GhCPK76 |
| ttctagctctaaaacACGGTTTATGTTTGCTGCTA  | gaccagccgggaat | GhCPK77 |
| ttctagctctaaaacATTCCATACTCCTTCATAGC  | gaccagccgggaat |         |
| ttctagctctaaaacTTTTCATTGCCTATGGCAAC  | gaccagccgggaat |         |
| ttctagctctaaaacATGGCAACGTAGGTGTATCC  | gaccagccgggaat |         |
| ttctagctctaaaacCAACGTTAATCTGGGGGAAA  | gaccagccgggaat |         |
| ttctagctctaaaacTTGTTGTGAACTCGTCGTAG  | gaccagccgggaat |         |
| ttctagctctaaaacACTCTTTTCAGTCCGACTTCT | gaccagccgggaat |         |
| ttctagctctaaaacCTTTGCAATCGATTTGCAAG  | gaccagccgggaat |         |
| ttctagctctaaaacGGCGGTACCCATCATAATGA  | gaccagccgggaat |         |
| ttctagctctaaaacAGGCGGTACCCATCATAATG  | gaccagccgggaat |         |
| ttctagctctaaaacCTGTTTCTGTGGGACTCTTT  | gaccagccgggaat |         |
| ttctagctctaaaacAAATTCACCTCGGCCGAGCT  | gaccagccgggaat |         |
| ttctagctctaaaacTGCGGGAAGCGTACTGATTT  | gaccagccgggaat |         |
| ttctagctctaaaacTGGAAGATGAAGGAACCACG  | gaccagccgggaat |         |
| ttctagctctaaaacGAGAAATTCGATTTACAGTC  | gaccagccgggaat |         |
| ttctagctctaaaacTTGGAACCTCCTGCAAGCACG | gaccagccgggaat |         |
| ttctagctctaaaacCCTCCGGTCCGTAATGCTTG  | gaccagccgggaat |         |
| ttctagctctaaaacCGTAATCGATGCTCCCGCTA  | gaccagccgggaat |         |
| ttctagctctaaaacTGGATCTGATGCGAAATCA   | gaccagccgggaat |         |
| ttctagctctaaaacTCCTGTAGGAAGAACA      | gaccagccgggaat |         |

|                                                      |                        |
|------------------------------------------------------|------------------------|
| ttctagctctaaaacCATTACGGCTGAAACAGATTtgcaccagccgggaat  | GhCPK78                |
| ttctagctctaaaacCATAATCATTGTGCCGCTATtgcaccagccgggaat  | GhCPK79                |
| ttctagctctaaaacAAAGATGTTGTGCATTCGCCtgcaccagccgggaat  | GhCPK80                |
| ttctagctctaaaacTCCTAGCATCCTCCACATCCtgcaccagccgggaat  | GhCPK81                |
| ttctagctctaaaacTGAGCTTTACTTTAGGCCtgcaccagccgggaat    | GhCPK82                |
| ttctagctctaaaacGGTCAAATCTCGGTACATAtgcaccagccgggaat   | GhCPK1 and GhCPK44     |
| ttctagctctaaaacGCAGACTAGATCCTTGGCACtgcaccagccgggaat  | GhCPK2 and GhCPK43     |
| ttctagctctaaaacGCATGTTTCTGGCCAACAATtgcaccagccgggaat  | GhCPK3 and GhCPK45     |
| ttctagctctaaaacCGACCTAGTTCTTTTCCGATtgcaccagccgggaat  | GhCPK4 and GhCPK46     |
| ttctagctctaaaacAAATTGACCACGACCTAGTTtgcaccagccgggaat  | GhCPK5 and Gh_D03G0701 |
| ttctagctctaaaacCTGCCTCTGTGAGCTTTGATtgcaccagccgggaat  | GhCPK6 and GhCPK48     |
| ttctagctctaaaacTGGCCTTCTATTTTCAGAGAGtgcaccagccgggaat | GhCPK7 and GhCPK49     |
| ttctagctctaaaacGTACCTTTCTCGATGCAAAGtgcaccagccgggaat  | GhCPK8 and GhCPK47     |
| ttctagctctaaaacCTTCGTATCTCTGTGAGCAAtgcaccagccgggaat  | GhCPK9 and GhCPK59     |
| ttctagctctaaaacACGAGAATGGATACTTGTCTGtgcaccagccgggaat | GhCPK10 and GhCPK52    |
| ttctagctctaaaacATTTTCTGAAGTCCGTCTCTtgcaccagccgggaat  | GhCPK11 and GhCPK53    |
| ttctagctctaaaacCCGTGCTATCACGCTTGAAGtgcaccagccgggaat  | GhCPK12 and GhCPK51    |
| ttctagctctaaaacAGGCACAACCTGATGTTCCAtgcaccagccgggaat  | GhCPK13 and GhCPK54    |
| ttctagctctaaaacGTGGACGGAAGACCATTGCAtgcaccagccgggaat  | GhCPK14 and GhCPK55    |
| ttctagctctaaaacACACAAGTTAGCTGCTTTCCtgcaccagccgggaat  | GhCPK15 and GhCPK56    |
| ttctagctctaaaacTCCGGTAATCGGAATACTCAtgcaccagccgggaat  |                        |
| ttctagctctaaaacTTCGTAGTTCCCTCCGGAGTTtgcaccagccgggaat |                        |
| ttctagctctaaaacCCAGTTGGATCATTTAGAACTgcaccagccgggaat  |                        |
| ttctagctctaaaacTCTTCTCATGAGAAGCTGTTtgcaccagccgggaat  |                        |
| ttctagctctaaaacGGGGCATCTCTCATGCTTATtgcaccagccgggaat  |                        |
| ttctagctctaaaacCGTCGGTAAAACTTGGCCTtgcaccagccgggaat   |                        |
| ttctagctctaaaacTTGTTGGGTTCCACTTCTCAtgcaccagccgggaat  |                        |
| ttctagctctaaaacGCGTTAACATCTTTTCGGACAtgcaccagccgggaat |                        |
| ttctagctctaaaacTAGCAAGCGCAGCTGCCTTTtgcaccagccgggaat  |                        |
| ttctagctctaaaacGTGTCTTGCATCATAGCTACtgcaccagccgggaat  |                        |
| ttctagctctaaaacTTTGAGAACCTCAGGAGCCAtgcaccagccgggaat  |                        |
| ttctagctctaaaacGAGCTTTGGGTCTGGTTCCAtgcaccagccgggaat  |                        |
| ttctagctctaaaacAGGGTCTTCTTACCAAGATCtgcaccagccgggaat  |                        |
| ttctagctctaaaacAAGGATGGCCTGAAAGGAACtgcaccagccgggaat  |                        |
| ttctagctctaaaacTCCTGAAATAAGGCAGAAAGtgcaccagccgggaat  |                        |
| ttctagctctaaaacCGTACGTGCCTTTAATCGTCtgcaccagccgggaat  |                        |
| ttctagctctaaaacCAGTGCAGGTTCTAAGTAAGtgcaccagccgggaat  |                        |
| ttctagctctaaaacCTTCTTGGTATGTGCTTCAAGtgcaccagccgggaat |                        |
| ttctagctctaaaacCTCGAATTCAAGGCATCAGCtgcaccagccgggaat  |                        |

ttctagctctaaaacCGCGGCTCATGTTTTCTCTtgcaccagccgggaat  
ttctagctctaaaacCAGAGAGTCTCTCTGCTATGtgcaccagccgggaat  
ttctagctctaaaacCTGGATTCCGCTGTATTATCtgcaccagccgggaat  
ttctagctctaaaacTCTTTAAGCTCCTCCAACGAtgcaccagccgggaat  
ttctagctctaaaacCGTATTACCATCCTGACAAAtgcaccagccgggaat  
ttctagctctaaaacCGGTGCACTTGAATAAACTGtgcaccagccgggaat  
ttctagctctaaaacACCAGATTCTCTTCCCTTTtgcaccagccgggaat  
ttctagctctaaaacCGGAGATTATTTGCTTGATGtgcaccagccgggaat  
ttctagctctaaaacAAGAACTTCGGGTGCTATGTtgcaccagccgggaat  
ttctagctctaaaacTCTGCTTGCTTTGGCGCATCtgcaccagccgggaat  
ttctagctctaaaacTTCTGGGCAGGTTAGTAATCtgcaccagccgggaat  
ttctagctctaaaacGAGTTGGGATCAGTACACAAtgcaccagccgggaat  
ttctagctctaaaacTCAAGGGGAAGCTTCCCTTtgcaccagccgggaat  
ttctagctctaaaacCTGTTATCGGAATCTATGGTtgcaccagccgggaat  
ttctagctctaaaacATAAACATCCTGCAATGACCTtgcaccagccgggaat  
ttctagctctaaaacCCTCTTTGGGTTTTCTTTTtgcaccagccgggaat  
ttctagctctaaaacCTTTGGGTTTCTTTTCTCAtgcaccagccgggaat  
ttctagctctaaaacTTAGTGCTCTCTTCTTCAGCtgcaccagccgggaat  
ttctagctctaaaacGCTACTTCCTCAACTGACAAAtgcaccagccgggaat  
ttctagctctaaaacCAGCACTCCAAACATCCACTtgcaccagccgggaat  
ttctagctctaaaacTCCTGCACGTTCAACAATCAtgcaccagccgggaat  
ttctagctctaaaacCAGTTGGGTTTCAGGCTGATGtgcaccagccgggaat  
ttctagctctaaaacCTTGATTCTTTAGTCTAGGtgcaccagccgggaat  
ttctagctctaaaacCGCTACCTATTGGCTTGTCTtgcaccagccgggaat  
ttctagctctaaaacCGTAGTTAATTCTCCCGTCCtgcaccagccgggaat  
ttctagctctaaaacCGGGCTAGACTGACTGCTGtgcaccagccgggaat  
ttctagctctaaaacTGGCCAACAATTAGTGACAGtgcaccagccgggaat  
ttctagctctaaaacGGGTTCGTCTTGTAGTAGAGCtgcaccagccgggaat  
ttctagctctaaaacTTTGGTACCGGATCTATCATtgcaccagccgggaat  
ttctagctctaaaacCTGCATCCTCATAAGCTCCTtgcaccagccgggaat  
ttctagctctaaaacCCAAAGAATGGCAAGCTTCCtgcaccagccgggaat  
ttctagctctaaaacTGGGATCCTTGTTCGTAGCATCtgcaccagccgggaat  
ttctagctctaaaacTTCCTTGGGATCCTTGTTCGTAtgcaccagccgggaat  
ttctagctctaaaacCGTGTCCCTTGGAGATTCTTCAAtgcaccagccgggaat  
ttctagctctaaaacCCGACTTCTACGAACTGCAAtgcaccagccgggaat  
ttctagctctaaaacTTGCAAGAGAAGACGTGAAAtgcaccagccgggaat  
ttctagctctaaaacCGGCAGCTCTTTCAGTGTAAtgcaccagccgggaat  
ttctagctctaaaacACGCGAGGTTGCTATAATGTtgcaccagccgggaat  
ttctagctctaaaacGTTCTAACATCTGCCGAACAtgcaccagccgggaat

GhCPK15 and GhCPK56

GhCPK16 and GhCPK57

GhCPK17 and GhCPK58

GhCPK18 and GhCPK59

GhCPK20 and GhCPK60

GhCPK21 and GhCPK61

GhCPK22 and GhCPK62

GhCPK23 and GhCPK63

GhCPK24 and GhCPK64

GhCPK25 and GhCPK65

GhCPK26 and GhCPK66

GhCPK27 and GhCPK67

GhCPK28 and GhCPK68

GhCPK29 and GhCPK69

GhCPK30 and GhCPK70

GhCPK31 and GhCPK71

GhCPK32 and GhCPK72

GhCPK33 and GhCPK74

GhCPK34 and GhCPK75

GhCPK35 and GhCPK73

ttctagctctaaaacCGTTTTGGGAAATCCATGGAAtgcaccagccgggaat  
ttctagctctaaaacCATGGTTCGTCTTCCGATTCtgcaccagccgggaat  
ttctagctctaaaacCAATACTTCTGGAGCTACATtgcaccagccgggaat  
ttctagctctaaaacTCACGATCTGCCGGCACAAAtgcaccagccgggaat  
ttctagctctaaaacCTTCACATGAGGAGGCTTAGtgcaccagccgggaat  
ttctagctctaaaacTGCAAGACTTGGTTCGAATATtgcaccagccgggaat  
ttctagctctaaaacTTCAGAACGGTTGACAGCTCtgcaccagccgggaat  
ttctagctctaaaacTCCCGCTGTTTACAGTTCCTtgcaccagccgggaat  
ttctagctctaaaacCGCGTTCTAGTTTATTGAGGtgcaccagccgggaat  
ttctagctctaaaacTAAACATTTCTCGCAAGCCAtgcaccagccgggaat  
ttctagctctaaaacCGGTTTTATTTTGCAGGCTGtgcaccagccgggaat  
ttctagctctaaaacCCGGGCTTGTTATCAGATAGtgcaccagccgggaat  
ttctagctctaaaacGGGCAGCTGTTAACCTCCTTtgcaccagccgggaat  
ttctagctctaaaacTGCCTGAGTTCTTCAAGTGTtgcaccagccgggaat

GhCPK36 amd GhCPK76

GhCPK37 and GhCPK77

GhCPK38 and GhCPK78

GhCPK39 and GhCPK79

GhCPK40 and GhCPK80

GhCPK41 and GhCPK81

GhCPK42 and GhCPK82



**Table S4 Validation of vector library construction for pool 1**

| Targeted gene ID | Targeted gene name | sgRNA sequence                                | Count  | Gene covered |
|------------------|--------------------|-----------------------------------------------|--------|--------------|
| Gh_A01G0621      | GhCPK1             | TCCTCTTCTCCGTTTCTGTG<br>TGGTGAATTGGGGTTGAAC   | 4<br>6 | Yes          |
| Gh_A01G1119      | GhCPK2             | AATGAAGCAGACCATCTAGT<br>ACAAGGAAGGGTCCAAGACA  | 2<br>0 | Yes          |
| Gh_A02G0144      | GhCPK3             | GCAAGTTGTCGGCAACCACC<br>CCTTCCCTAAGTGTGTTGAAT | 5<br>4 | Yes          |
| Gh_A02G0609      | GhCPK4             | GACAGCAGCAACCAAAGGAT<br>CGACAGCAGCAACCAAAGGA  | 2<br>1 | Yes          |
| Gh_A02G1029      | GhCPK5             | CAGTGAACAATTAGCTTCG<br>ATTGCACCACAGATCATCAA   | 2<br>5 | Yes          |
| Gh_A02G1635      | GhCPK6             | TCTTAGGGTAAAAGCACCAA<br>AGTGCACCGTGACATGAAAC  | 1<br>4 | Yes          |
| Gh_A02G1796      | GhCPK7             | GCAAGCTTAGGTAGAACTTA<br>TCACACCCAAGTTCATATCT  | 0<br>1 | Yes          |
| Gh_A03G1505      | GhCPK8             | GCAAATATGGAGAGATCCGT<br>CAGTCCATATTACGTTGCTC  | 1<br>3 | Yes          |
| Gh_A04G0148      | GhCPK9             | GTTGGACACAAGTATGTGAA<br>ATTCACAATTGCCCTGCACA  | 3<br>3 | Yes          |
| Gh_A04G0467      | GhCPK10            | GAACAATGCCAATAAGGCTT<br>GGTTGGAAGTCCATATTATG  | 3<br>4 | Yes          |
| Gh_A04G0780      | GhCPK11            | GTAGTAATGAACCAACCCGT<br>GAGGAACTCAGAAGTCCG    | 1<br>1 | Yes          |
| Gh_A04G1372      | GhCPK12            | GGTCCTAAACCAGCCGAAGA<br>TTGCAGAAAAGTCTTCATG   | 2<br>1 | Yes          |
| Gh_A04G1429      | GhCPK13            | GTCGATATCGAAGACGAAGT<br>GCTAAGAAGAAGATGGTTGG  | 0<br>3 | Yes          |
| Gh_A05G0617      | GhCPK14            | CGCTGCTTCTTTGCTTCGCA<br>GTCTAATATTGTCGAGCTCA  | 2<br>2 | Yes          |
| Gh_A05G1571      | GhCPK15            | CTAACCACTGACAAGGACGT<br>GTTATTTGAATCAGGCCAA   | 3<br>3 | Yes          |
| Gh_A05G2355      | GhCPK16            | TTCAGCATAGCCGATGCCTT<br>TGTTGGTCTTTCATTCCAA   | 1<br>2 | Yes          |
| Gh_A05G2859      | GhCPK17            | TAACATAAGACAACGTACCG<br>ATCCAAAGCCAAGCTGCGGA  | 3<br>2 | Yes          |
| Gh_A05G3246      | GhCPK18            | GGGTTCTGAACTTATGGAAT<br>GTTCGGAGTGACGGCAAATG  | 5<br>5 | Yes          |
| Gh_A06G0013      | GhCPK19            | GATTTGTTGGACAGGATGGG<br>ACAGAAGCAAGCCCGATTGA  | 2<br>5 | Yes          |
| Gh_A06G1772      | GhCPK20            | AGTGAGGAAGATGTTGACAA<br>CTTGTTTTGTTGGCTAATGG  | 0<br>3 | Yes          |

**Table S5 Primers for sgRNA high throughput detection**

| <b>Primer name</b> | <b>Primer sequence</b>        |
|--------------------|-------------------------------|
| GTL-1-F            | GACgcctagAGAAGCATCAGATGGGCAAA |
| GTL-2-F            | GACgcgctaAGAAGCATCAGATGGGCAAA |
| GTL-3-F            | GACgcggatAGAAGCATCAGATGGGCAAA |
| GTL-4-F            | GACgcgtaAGAAGCATCAGATGGGCAAA  |
| GTL-5-F            | GACgctacgAGAAGCATCAGATGGGCAAA |
| GTL-6-F            | GACgtacgaAGAAGCATCAGATGGGCAAA |
| GTL-7-F            | GACgtcacgAGAAGCATCAGATGGGCAAA |
| GTL-8-F            | GACgtcgctAGAAGCATCAGATGGGCAAA |
| GTL-9-F            | GACgtcgtaAGAAGCATCAGATGGGCAAA |
| GTL-10-F           | GACgtggacAGAAGCATCAGATGGGCAAA |
| GTL-11-F           | GACgacatgAGAAGCATCAGATGGGCAAA |
| GTL-12-F           | GACgacgtaAGAAGCATCAGATGGGCAAA |
| GTL-13-F           | GACgactgtAGAAGCATCAGATGGGCAAA |
| GTL-14-F           | GACgagtcaAGAAGCATCAGATGGGCAAA |
| GTL-15-F           | GACgatcgaAGAAGCATCAGATGGGCAAA |
| GTL-16-F           | GACgcaccgAGAAGCATCAGATGGGCAAA |
| GTL-1-R            | GACacgtcaGACCCGAATTTGTGGACCTG |
| GTL-2-R            | GACaccatgGACCCGAATTTGTGGACCTG |
| GTL-3-R            | GACacgagcGACCCGAATTTGTGGACCTG |
| GTL-4-R            | GACacagcgGACCCGAATTTGTGGACCTG |
| GTL-5-R            | GACatgatgGACCCGAATTTGTGGACCTG |
| GTL-6-R            | GACatcateGACCCGAATTTGTGGACCTG |
| GTL-7-R            | GACatggtcGACCCGAATTTGTGGACCTG |
| GTL-8-R            | GACatgctgGACCCGAATTTGTGGACCTG |
| GTL-9-R            | GACagcacgGACCCGAATTTGTGGACCTG |
| GTL-10-R           | GACagctcaGACCCGAATTTGTGGACCTG |
| GTL-11-R           | GACagatgtGACCCGAATTTGTGGACCTG |
| GTL-12-R           | GACagacgaGACCCGAATTTGTGGACCTG |

**Table S6 Primers for gene editing detection of *GhCPKs* mutant library materials**

| Primer sequence                                     | sgRNA                 | Gene ID     | Gene name |
|-----------------------------------------------------|-----------------------|-------------|-----------|
| TCCATTTTGGGCAGGTAA<br>AGGTCCTTGGCACTCTCTG           | TCCTCTTCTCCGTTTCTGTG  | Gh_A01G0621 | GhCPK1    |
| AATGACCCAAAGACAACAATC<br>GTGGTCCCGAACTGTCCT         | ACAAGGAAGGGTCCAAGACA  | Gh_A01G1119 | GhCPK2    |
| TAATCAATCATCATCAATACCGA<br>TCGTAATCTTCACGGCATAA     | GACAGCAGCAACCAAAGGAT  | Gh_A02G0609 | GhCPK4    |
| TAATCAATCATCATCAATACCGA<br>TCGTAATCTTCACGGCATAA     | CGACAGCAGCAACCAAAGGA  | Gh_A02G0609 | GhCPK4    |
| AGAAGAAATTATTGGTTTGAAGG<br>GTAAATTGTTTAAAAGCACAGTGA | CAGTGGAAACAATTAGCTTCG | Gh_A02G1029 | GhCPK5    |
| AATCTTAGTTTTCTTCAAGTTTC<br>GAGCACTTTACCTTTAGAGCAA   | ATTGCACCACAGATCATCAA  | Gh_A02G1029 | GhCPK5    |
| AAAGTTGCGGCTGAGTGTC<br>AGTCTGGACGTGTTGACTTAAA       | AGTGCACCGTGACATGAAAC  | Gh_A02G1635 | GhCPK6    |
| GATGGATACTGCCAATAGAGG<br>GTCTGTGCCGCCAAATATC        | GCAAGCTTAGGTAGAACTTA  | Gh_A02G1796 | GhCPK7    |
| GAAAAAAGAAGCAAAATCCATT<br>CAATGTCAACGTCAGTCCTTAG    | TCACACCCAAGTTCATATCT  | Gh_A02G1796 | GhCPK7    |
| ATAATGAAACCGATGTCGTCTG<br>ATACATCTGCTTCTGGTCCATAAT  | CAGTCCATATTACGTTGCTC  | Gh_A03G1505 | GhCPK8    |
| TCAACTCAAGCCCTAGGTA<br>CATAAACCGCATAATTTCAATC       | GTTGGACACAAGTATGTGAA  | Gh_A04G0148 | GhCPK9    |
| ATGTGCTGGTGGTGAGTTGT<br>CGAAATCAGTAGCCTTCAAAA       | ATTCACAATTGCCCTGCACA  | Gh_A04G0148 | GhCPK9    |
| TGAGAACACTGCCCTGTAC<br>CGAATTGTCCTTGACCTAACTT       | GAACAATGCCAATAAGGCTT  | Gh_A04G0467 | GhCPK10   |
| GAGAGTTCGGCGTTACTTATCT<br>AACCGCATTGTCGTCTC         | GAGGAAACTCAGAACTGCCG  | Gh_A04G0780 | GhCPK11   |
| ATGGGAAATGTTTGTGCTACA<br>GCCTTTGGCTTAGGGTCT         | GGTCCTAAACCAGCCGAAGA  | Gh_A04G1372 | GhCPK12   |
| CCAGCGAACAAGAAAGCA<br>TCCCTCCTAACATCATCCAC          | GTCGATATCGAAGACGAAGT  | Gh_A04G1429 | GhCPK13   |
| AAGCATTCCGTTTCATTGG                                 | CGCTGCTTCTTTGCTTCGCA  | Gh_A05G0617 | GhCPK14   |

|                          |                       |             |         |
|--------------------------|-----------------------|-------------|---------|
| AGGGGAATCTTCATCCTTATT    | CGCTGCTTCTTTGCTTCCCA  | Gh_A05G0617 | GhCPK14 |
| CAAGGAGGATATTGAGGATGTT   | GTCTAATATTGTCTGAGCTCA | Gh_A05G0617 | GhCPK14 |
| CGTGCGAAGCAAAGAAGC       |                       |             |         |
| ATTGAAAAGGCTACGAAACG     | CTAACCACTGACAAGGACGT  | Gh_A05G1571 | GhCPK15 |
| CATAAGCACCTTTGAACTCCA    |                       |             |         |
| TTGTGGAGTGCCTTCAGC       | GTTATTTGAATCACGGCCAA  | Gh_A05G1571 | GhCPK15 |
| TATCTGGTAAAAGGGAACGAC    |                       |             |         |
| ATTTCTTATTCGGAGGTGTTCT   | TGTTGGGTCTTTTCATTCCAA | Gh_A05G2355 | GhCPK16 |
| TCATTTAATATCCTGTGTTGGG   |                       |             |         |
| GTTTCGACATAAGAACGGGA     | ATCCAAAGCCAAGCTGCGGA  | Gh_A05G2859 | GhCPK17 |
| ATGACCTTTAGCGACGATTC     |                       |             |         |
| AGAAATCGGTGGTCTGAAAG     | GGGTTCTGAACTTATGGAAT  | Gh_A05G3246 | GhCPK18 |
| TAGCAAAGGATCAAAAAGTAAGTG |                       |             |         |
| AGAAATCGGTGGTCTGAAAG     | GTTCCGAGTGACGGCAAATG  | Gh_A05G3246 | GhCPK18 |
| TAGCAAAGGATCAAAAAGTAAGTG |                       |             |         |
| ATGGATCGGGAAGAACATCT     | CACTTCGACAAAGACAATAG  | Gh_A08G2530 | GhCPK23 |
| GCATACCATACTCACGGAGAG    |                       |             |         |
| GCGCATATTATATTGCACCAG    | GTATGGCACGTTTCATGATGT | Gh_A08G2530 | GhCPK23 |
| CCTTTTAGTTTTCGCCATGAAT   |                       |             |         |
| TTTTACAAGCCAGGTTGAGAT    | CTTCACCTGTAAGAGATCCA  | Gh_A09G1033 | GhCPK24 |
| TTCAGGTCCATATTTCTCTTT    |                       |             |         |
| CCATCACGGTGGAAACAAG      | GGGGAGGCTGTATTATTCCT  | Gh_A09G1033 | GhCPK24 |
| ATGTTGTAGGTGGCTGTAATGT   |                       |             |         |
| GAAGCATTTGCCCAAGC        | CAAGGGGACACTACACTGAA  | Gh_A09G1067 | GhCPK25 |
| AACCTGAACAACCTTCGACAAT   |                       |             |         |
| TCTGCGAGATTCCTTAAACG     | TGGAGATGTTTTGGTTCAAG  | Gh_A09G1067 | GhCPK25 |
| TGCAACAAACTCCTCGTAACT    |                       |             |         |
| TTTACTGCCATCTCCATTCAC    | AGATGAGTTGGCTGATGAGC  | Gh_A09G1157 | GhCPK26 |
| ACCAGTCTAACCTTGCTGTGTC   |                       |             |         |
| CATTTTGGGGTGGTAAGACT     | TGGTGAACCTGACTTCACAT  | Gh_A09G1248 | GhCPK27 |
| TTGGGGTTTCTAACAAGCAT     |                       |             |         |
| TGCCGCTTGTTTGATGTTA      | GGTGGATGAAGCCAGCATCA  | Gh_A10G0124 | GhCPK28 |
| TGTTCCAAAAGTTTGATTTGC    |                       |             |         |
| ATGGGTTGTTTTAGCAGCA      | TAGCAGCAAGCATAAATTGC  | Gh_A10G0124 | GhCPK28 |
| AAGGCTTCAAAGGGACAGA      |                       |             |         |



|                          |                       |             |         |
|--------------------------|-----------------------|-------------|---------|
| CGGTATAAGCATAGTGGGACTT   | TTAGAGGCCCTGAAAGGCCA  | Gh_A10G0886 | GhCPK29 |
| GAACTGAATGAACAGCCATAAT   |                       |             |         |
| TGTACCGATTCCAAAACATTAT   | AAGTGGAACACTAAGCTACG  | Gh_A10G1195 | GhCPK30 |
| AAGTTCTTCGACTTCGATGTAA   |                       |             |         |
| CCCGAATGCCTGATGACT       | TAAACCAGAGACCAAACAAG  | Gh_A10G1756 | GhCPK31 |
| CTGCACTGGACACCCTTTT      |                       |             |         |
| AAATGCAGAGTGAGGTCAACAT   | TATCTTTCAGGTCTGCAGGA  | Gh_A11G0213 | GhCPK32 |
| CGATATTCATCACCTTTTCTT    |                       |             |         |
| ACGCTAAGGAAAAGGATGGA     | TTTCCTCCTTCTCTAACCCA  | Gh_A11G1615 | GhCPK33 |
| CGGGAAGACAACTAGATTACC    |                       |             |         |
| TGTGACGGGATAGACCTTGT     | GTAAACATCCTGTCAGCGTC  | Gh_A11G2941 | GhCPK34 |
| TGGTCTTACTGTGCCTGCTA     |                       |             |         |
| TGGTTGGAAGCCCGTATT       | CAAGCATTACGGACCAGAAG  | Gh_A12G0109 | GhCPK36 |
| ACACATAGAAGTGCCTTGAAAATC |                       |             |         |
| TATTTCAATTTGTTCTCAGGCTG  | ATAGTGGGAGCATCGATTAT  | Gh_A12G0109 | GhCPK36 |
| GATGTAGCCACTGTTGTCCTTA   |                       |             |         |
| CATTTTCGGATGTGATTCTTTC   | ACCGTGTTCTTCCTACAGGA  | Gh_A12G2686 | GhCPK37 |
| TGCGTCTTCGGTTATTGG       |                       |             |         |
| CATTTTCGGATGTGATTCTTTC   | TCCATCCTGTAGGAAGAACA  | Gh_A12G2686 | GhCPK37 |
| TGCGTCTTCGGTTATTGG       |                       |             |         |
| AAGGAATCTTCGCTGCTGT      | TGTGCATTACCCCTTCAGAA  | Gh_A13G0563 | GhCPK39 |
| CATGACCATCAAACAGATAATAAT |                       |             |         |
| GGACAGGGACAGTTTGGG       | CAGCCAAATGGTGCATAATT  | Gh_A13G0566 | GhCPK40 |
| CTATCAAACAGTTCGCCTCC     |                       |             |         |
| GGACAGGGACAGTTTGGG       | TATGTACCGAGATTTGACT   | Gh_A13G0566 | GhCPK40 |
| CTATCAAACAGTTCGCCTCC     |                       |             |         |
| AATGCTAATGTGTGACCTGACT   | AACATCGATACTGACAACAG  | Gh_A13G1164 | GhCPK41 |
| TAGATCCCAGTCGAGCTAATC    |                       |             |         |
| GGGACAACCTAATATCGTGG     | TTGGTGATGGAATTGTGCGG  | Gh_A13G1891 | GhCPK42 |
| GCATAATCGTCCGAAGCA       |                       |             |         |
| TGGTGCTAATCTTGCTGAATC    | CGTGCTCTAATGCAGGCCGT  | Gh_D01G1194 | GhCPK43 |
| ATCTGCCTGTGATTCCCAA      |                       |             |         |
| TTGATCTTATCCTTAACCCCTAA  | CCTGATTAAGATGGAAGGTA  | Gh_D01G2360 | GhCPK44 |
| AAACTTCAAATGCCATAGTCA    |                       |             |         |
| TGATGGACACCGACGAGA       | CAGAAAATCGGCTCACTCTGT | Gh_D02G0183 | GhCPK45 |

|                           |                      |             |         |
|---------------------------|----------------------|-------------|---------|
| GATTATGTCCGCAACCGTA       | CAGAAAACGGTACCTCTGT  | Gh_D02G0163 | GhCPK45 |
| CTTTACCTGAATACCCCGAC      | TCAACCGTAAAATGAGCGGA | Gh_D02G0663 | GhCPK46 |
| CCTTCATACAAGCAAGAAAAAT    | CCGACGACAACAGCAACCAA | Gh_D02G0663 | GhCPK46 |
| TAATCAATCATCATCAATACCGA   | AGCTGAAAGTCTTTCCGAGG | Gh_D02G1973 | GhCPK47 |
| TCGTAATCTTCACGGCATAA      | ACTTCGGGAGCAACGTAATA | Gh_D02G1973 | GhCPK47 |
| AGCTGTTTCTCATTAACATGCT    | CACTTACGTTGCAATAGACA | Gh_D03G0087 | GhCPK48 |
| TTCAAGGTAGAGCCGTATCTTC    | TAGCAGTTCGTAAAAGCCGT | Gh_D03G0087 | GhCPK48 |
| TGTGTGGTTTACAATGTTAGGC    | GGTCAACATCACCATGGCAA | Gh_D03G0609 | GhCPK49 |
| ATCAATACCTGCCCAAATG       | GCGTTCGGGGTGAAGTCAAA | Gh_D04G0366 | GhCPK50 |
| ACCGAAGAAACAAAGTGGG       | TGGCTTAGGGTCTCTTCTCC | Gh_D04G0895 | GhCPK51 |
| ATCCAGAAGCACAAATCAA       | CCTGTCTGTGCAATAAGCAA | Gh_D04G0895 | GhCPK51 |
| TTGCCCGTTTTATTAGTAGGA     | AAGGGCAGCTGCACTTGCTA | Gh_D04G0900 | GhCPK52 |
| CTACAACCTTCTGAGTATTCCGATT | CGATCTCGAAGAGGAAACTC | Gh_D04G1271 | GhCPK53 |
| AGAAAGGAAAAAGAAGCAGAA     | TGTGTACAGAGCTTTCCACG | Gh_D04G1486 | GhCPK54 |
| CAATGTCAACGGCAGTCC        | CATATAACTGCGTTGTCAAG | Gh_D05G0748 | GhCPK55 |
| TGTAATAAACAGGATGGACAAAT   | CAGAGCTTGCTCTAGTTCTT | Gh_D05G0748 | GhCPK55 |
| TCAAACCTGAACTATTCAATTCCTT | GGTTTCTTCAAGTTGAACAC | Gh_D05G1749 | GhCPK56 |
| CCGACAACGAAGGTGAGA        | GTCTTTCATTCCAAACGCAT | Gh_D05G2622 | GhCPK57 |
| ATAGGCGTGGACATTGACAT      |                      |             |         |
| GCGTCCGACATGGATATATTA     |                      |             |         |
| GGGCTTCCAACCACATCA        |                      |             |         |
| CTTACGAAGATGCTGTGGCTAT    |                      |             |         |
| ATTTTCGGGCTTGAGGTC        |                      |             |         |
| GAGTTCGGCGTTACTTATCTTT    |                      |             |         |
| GAACCGCATTGTCGTCCT        |                      |             |         |
| ATAAGACTCCCAACATTCGTG     |                      |             |         |
| ATCTCCCTCCTAACATCATCC     |                      |             |         |
| TGGCTCATTGTTTTGTTTCG      |                      |             |         |
| CGCAAAGCAACTTTCTTGAA      |                      |             |         |
| AAAGACAACAGCGGGTAATG      |                      |             |         |
| CAACTTCAGAAACGATTCCTT     |                      |             |         |
| AAAGCCCTTCAAATCTCCC       |                      |             |         |
| ACTGGACTGCACACGAGCT       |                      |             |         |
| ATTTCTTATTCGGAGGTGTTCT    |                      |             |         |
| TCATTTAATATCCTGTGTTGGG    |                      |             |         |

|                                                                         |                         |             |         |
|-------------------------------------------------------------------------|-------------------------|-------------|---------|
| GGCAGAGGCATTTATGTTGT<br>AAGAAGAATGTCCGCTACACA<br>CAATTATCGTTGGAGGAGCT   | TGGTTGTTGCTGAATTGTGG    | Gh_D05G2622 | GhCPK57 |
| ACGTACACCATTTTCATGTAAAT<br>AGGATTATTGCCAAAGGACA<br>CCGATAACCCGAAATCAGTA | TGAGGTTCAAATGTTGATGC    | Gh_D05G3156 | GhCPK58 |
| AGGATTATTGCCAAAGGACA<br>CCGATAACCCGAAATCAGTA<br>AGGATTATTGCCAAAGGACA    | TGAAAGAGCAGCTGCTTCCA    | Gh_D05G3567 | GhCPK59 |
| CCGATAACCCGAAATCAGTA<br>AGATGTTCTGTTCCGATTGTATT<br>CTCATTCGGGTCCATCGT   | GAAAGAGCAGCTGCTTCCAT    | Gh_D05G3567 | GhCPK59 |
| AATCAATAATTTCTGAAAATTGT<br>CGCTGTTATCGGTGTCCA                           | TTAGTTTCGAAAACGACCCA    | Gh_D06G2206 | GhCPK60 |
| TTCTGAAGTTGACATCGATAATG<br>TTTCCTCATCATTGCCACA                          | GTGTTGTGTAGGTGATTGCG    | Gh_D07G1198 | GhCPK61 |
| CAGATTTGCAGATCCTAGTGG<br>TGTAAGTGTTTCATCATTCCGCC                        | ATCACCAACCCACTGAATAG    | Gh_D07G1198 | GhCPK61 |
| TAACAAAAGGCGGATGCG<br>ACTATCGTTACCCGCTGTTG                              | GCACTTCACCCATATTATGT    | Gh_D07G1228 | GhCPK62 |
| CATTGAAAACACACCCCAT<br>GTTATCGTGCCGCTGTTAT                              | AATGTTCTTCCCGATCCATT    | Gh_D08G0142 | GhCPK63 |
| TGCCAATGAAAAGGGAGAC<br>CCAATGTTGTAGGTGGCTTTA                            | CAACAACAAGAACAATTTCA    | Gh_D08G0142 | GhCPK63 |
| ACAATAGCGGGTAATCATAGTTT<br>TATCAATATCAACTTCGGAATG                       | GAAGAAGCCAAGAGTCCTAA    | Gh_D09G1054 | GhCPK64 |
| CGGTTCCGTTGGATTCTT<br>AATTCAGAGTTCCATCACCATC                            | TAGTGCTTGCTCTAGTTCTT    | Gh_D09G1054 | GhCPK64 |
| TCAATGAGATTGTGGGAAGC<br>CTGGATGCACACATTGTCTCT                           | TATGCAAGAGAATGAACGAG    | Gh_D09G1074 | GhCPK65 |
| GAAGAAGTCATTA CTGCCATCA<br>TTGCTTCCCATTCTTCTTATT                        | AGGTTGATGTCTGGAGTGCT    | Gh_D09G1074 | GhCPK65 |
| TTTACTGCCATCTCCATTAC<br>ACCAGTCTAACCTTGTCTGTGTC                         | GTCACATTA CT CAGA ACCAG | Gh_D09G1163 | GhCPK66 |
| AGGGAACAAGAAGGGAAATC<br>TGCTCTTAACATTATGGGG                             | AGATGAGTTGGCTGATGAGC    | Gh_D09G1163 | GhCPK66 |
| TGTAAGCCAAACGAGAAGGA                                                    | ACAGACTGCTATAAAGAACG    | Gh_D09G1249 | GhCPK67 |
|                                                                         | AATGCTGAACTTGCTAAGAG    | Gh_D09G1249 | GhCPK67 |

|                          |                       |             |         |
|--------------------------|-----------------------|-------------|---------|
| CAATGCCTCCCTAAATCCA      | AAATCTGAAATTCGTAAGAG  | Gh_D10G1247 | GhCPK67 |
| CAGTTCAAAGCCAAGCCTA      | GTTGCCATAGGCAATGAAAA  | Gh_D10G0863 | GhCPK69 |
| AAAGAATACCTTCATTTTCTCAAT | GGATACACCTACGTTGCCAT  | Gh_D10G0863 | GhCPK69 |
| CAGTTCAAAGCCAAGCCTA      | CTTGCAAATCGATTGCAAAG  | Gh_D10G2029 | GhCPK71 |
| AAAGAATACCTTCATTTTCTCAAT | TCATTATGATGGGTACCGCC  | Gh_D11G0227 | GhCPK72 |
| TTGGGACGACTTTCTTTG       | CATTATGATGGGTACCGCCT  | Gh_D11G0227 | GhCPK72 |
| ACAACATGAACTGCCACTGC     | AAAGAGTCCCACAGAAACAG  | Gh_D11G0314 | GhCPK73 |
| ATGGGTAAGTGTAAACCGTCC    | AGCTCGGCCGAGGTGAATTT  | Gh_D11G0314 | GhCPK73 |
| CGATGGGTGGAGTGTTGG       | AAATCAGTACGCTTCCCCGA  | Gh_D11G1774 | GhCPK74 |
| ATGGGTAAGTGTAAACCGTCC    | CGTGCTTGCAGGAGTTCCAA  | Gh_D11G3329 | GhCPK75 |
| CGATGGGTGGAGTGTTGG       | CAAGCATTACGGACCGGAGG  | Gh_D12G0121 | GhCPK76 |
| TGTGTGGGTTTTGGCTTG       | TAGCGGGAGCATCGATTACG  | Gh_D12G0121 | GhCPK76 |
| AAATATCAAGCTGAAATCCATG   | TTGATTTTCGCATCAGATCCA | Gh_D12G2743 | GhCPK77 |
| TCCGAGTTCTGAAAGATGTGA    | TAAGTGTTCTTCCTACAGGA  | Gh_D12G2743 | GhCPK77 |
| CTTCCGCTTGGAGATTGAC      | AATCTGTTTCAGCCGTAATG  | Gh_D13G0033 | GhCPK78 |
| AACCCTCTGCCACCACTG       | GGCGAATGCACAACATCTTT  | Gh_D13G0560 | GhCPK79 |
| TTCCCAATGGTGTATCGCT      | GGATGTGGAGGATGCTAGGA  | Gh_D13G0560 | GhCPK79 |
| TCACGCCCGTAAAGATTCT      | GGCCTAAAGTGTAAGCTCA   | Gh_D13G0561 | GhCPK80 |
| GCGGTTCGATGCAAAGATA      |                       |             |         |
| GGTTGGAAGCCCCTATTA       |                       |             |         |
| AGAACCAAAGAAAAGAAACATC   |                       |             |         |
| GCTATTTTCATTTGTTCTCAGGC  |                       |             |         |
| GTTATGCTCGGCACAGGC       |                       |             |         |
| TTAAGCACGCCTATGGAATA     |                       |             |         |
| ATCTTTGGCACTGTTGGAAA     |                       |             |         |
| GACACAGACAGGGTATGCTTC    |                       |             |         |
| CTTGCCTCGTCGGTTATT       |                       |             |         |
| ATGGGTAATACTTGTGTAGGACC  |                       |             |         |
| TCTTTAGATGCTACTTCATTCCC  |                       |             |         |
| CGCTGCTGTGCTAAAAGG       |                       |             |         |
| ATTGCTTTGTATCAAGGTTTCAG  |                       |             |         |
| GACAAGGACAGTTTGGGATTA    |                       |             |         |
| CGTATAAAGTATCCTCATAAGCG  |                       |             |         |
| GAAGAGCCATTGATCACCAA     |                       |             |         |
| AATCTGAATCTCCCTCCTAACA   |                       |             |         |

|                                                  |                      |                             |                        |
|--------------------------------------------------|----------------------|-----------------------------|------------------------|
| GCAGAACTGAGAAGGGAATAT<br>AAATAAAGGCTGCTGTAAAGAA  | GTGCCAAGGATCTAGTCTGC | Gh_D13G1455                 | GhCPK81                |
| TCCCACCGTTACTTCACAT<br>CCGTTTCGCTATCGTCTTA       | ATCGGAAAAGAACTAGGTCG | Gh_D13G2278                 | GhCPK82                |
| TCCCACCGTTACTTCACAT<br>CCGTTTCGCTATCGTCTTA       | AACTAGGTCGTGGTCAATTT | Gh_D13G2278                 | GhCPK82                |
| ATGTGCAGGGTTGCAGGT<br>TCAGTCGTCGTGAGCTTCC        | CTTTGCATCGAGAAAGGTAC | Gh_A01G1119 and Gh_D01G1194 | GhCPK2 and GhCPK43     |
| TGACTTCTCATCTGATCCCTG<br>ATTCGATGGTTTTGATTAGT    | TGCTCGACAGAGATACGAAG | Gh_A01G1119 and Gh_D01G1194 | GhCPK2 and GhCPK43     |
| ATTTGATTATGGAAGTGTGTGC<br>GAGCCCGAAATCAGTAGGTT   | GGAAAGCAGCTAACTTGTGT | Gh_A02G1029 and Gh_D03G0701 | GhCPK5 and Gh_D03G0701 |
| GACCCTTTACTTGAGGAGGC<br>GATACCAGGCAAGCACAAA      | TGAGTATTCCGATTACCGGA | Gh_A02G1635 and Gh_D03G0087 | GhCPK6 and GhCPK48     |
| TGTTGATTTACCGAGTTTGT<br>ATTGTCACAAGAGTGCCAAAT    | AACTCCGGAGGAACTACGAA | Gh_A02G1635 and Gh_D03G0087 | GhCPK6 and GhCPK48     |
| AGAAAGGAAAAAAGAAGCAGAA<br>CAATGTCAACGGCAGTCC     | GTTCTAAATGATCCAAGTGG | Gh_A02G1796 and Gh_D03G0609 | GhCPK7 and GhCPK49     |
| GCATTTGTTTTTACAGGATGGT<br>AGAAAACCTGGAACATCTCTGT | TGAGAAGTGGAACCCAACAA | Gh_A04G0148 and Gh_D05G3567 | GhCPK9 and GhCPK59     |
| CTTACGAAGATGCTGTGGCTAT<br>GGCTTGAGGTCACGATGC     | AAAGGCAGCTGCGCTTGCTA | Gh_A04G0467 and Gh_D04G0900 | GhCPK10 and GhCPK52    |
| TCTTGCTGGTTGTAGATTTTATTC<br>AAAGACACTTACCAGCCCAA | TGGCTCCTGAGGTTCTCAA  | Gh_A04G0780 and Gh_D04G1271 | GhCPK11 and GhCPK53    |
| TCGTGGGTAAATAGATTTCAAA<br>ATCCACCTCCCTTCCCTG     | TGGAACCAGACCCAAAGCTC | Gh_A04G0780 and Gh_D04G1271 | GhCPK11 and GhCPK53    |
| GATTCTTTGGTGTAGACTATGGA<br>GTCTCAGCGGCAGAACTTA   | GTTCCTTTCAGGCCATCCTT | Gh_A04G1372 and Gh_D04G0895 | GhCPK12 and GhCPK51    |
| CAAAGAGGATGTGGATGATGTT<br>GTAATGCCCCCTCTGGATAA   | GACGATTAAAGGCACGTACG | Gh_A04G1429 and Gh_D04G1486 | GhCPK13 and GhCPK54    |
| GGGTCACTCTGGCAAATACTA<br>ATCGTCCACTGTTGTCTGT     | CATAGCAGAGACTCTCTG   | Gh_A05G2355 and Gh_D05G2622 | GhCPK16 and GhCPK57    |
| ATACAAAGCGAAAGGGAAGG<br>GCCTCTGCCAACTCTTTT       | TTTGTCAGGATGGTAATACG | Gh_A05G2859 and Gh_D05G3156 | GhCPK17 and GhCPK58    |
| CATTGACAACAACGGGACA<br>GAAAGGGAAGAGAATCTGGT      | GAAAGGGAAGAGAATCTGGT | Gh_A05G3246 and Gh_D04G0366 | GhCPK18 and GhCPK50    |



|                           |                        |                             |                     |
|---------------------------|------------------------|-----------------------------|---------------------|
| ACGTCGCTTAATCCAAACTC      | CAAAAGGAAATGAGACTGGCAA | Gh_A06G1772 and Gh_D06G2206 | GhCPK18 and GhCPK59 |
| AGTGGGTGAGTTCCGAAATA      | CATCAAGCAAATAATCTCCG   | Gh_A06G1772 and Gh_D06G2206 | GhCPK20 and GhCPK60 |
| ATAGAAGAAGTTTCCGAGTTTG    | ACATAGCACCCGAAGTTCTT   | Gh_A06G1772 and Gh_D06G2206 | GhCPK20 and GhCPK60 |
| TTTCGGTTTGTCTGTCTTTATC    | GATTACTAACCTGCCAGAA    | Gh_A07G1099 and Gh_D07G1198 | GhCPK21 and GhCPK61 |
| TACAAGATAACACCAGCACTCC    | GGTCATTGCAGGATGTTTAT   | Gh_A08G2530 and Gh_D08G0142 | GhCPK23 and GhCPK63 |
| CCAACAGGTGAAGAATTCAAAG    | TGAGAAAAGGAAACCCAAAG   | Gh_A09G1033 and Gh_D09G1054 | GhCPK24 and GhCPK64 |
| AAAAGGAAATGAGACTGGCAA     | GCTGAAGAAGAGAGCACTAA   | Gh_A09G1067 and Gh_D09G1074 | GhCPK25 and GhCPK65 |
| CATTGAAAACACACCCCAT       | AGTGGATGTTTGGAGTGCTG   | Gh_A09G1157 and Gh_D09G1163 | GhCPK26 and GhCPK66 |
| GTTATCGTGCCGCTGTTAT       | CCTAGGACTAAAGAATCAAG   | Gh_A09G1248 and Gh_D09G1249 | GhCPK27 and GhCPK67 |
| TATATCACTCACGGTATATCAAAAA | GGACGGGAGAATTAECTACG   | Gh_A10G0124 and Gh_D10G0130 | GhCPK28 and GhCPK68 |
| TCATAAAATATAATCAACATCACGC | CTGTACTAATTGTTGGCCA    | Gh_A10G0886 and Gh_D10G0863 | GhCPK29 and GhCPK69 |
| GCTACAAAATGCCAAGAAAAG     | GCTCTACTACAAGACGACCC   | Gh_A10G1195 and Gh_D10G1303 | GhCPK30 and GhCPK70 |
| CTCAGCAATCACCTGGAAAT      | ATGATAGATCCGGTACCAAA   | Gh_A10G1195 and Gh_D10G1303 | GhCPK30 and GhCPK70 |
| AGGTGAAAGGTTTACGGAGAT     | GGAAGCTTGCCATTCTTTGG   | Gh_A10G1756 and Gh_D10G2029 | GhCPK31 and GhCPK71 |
| GCCCTTGTGCGGTAGAAT        | TACGACAAGATCCCAAGGAA   | Gh_A11G0213 and Gh_D11G0227 | GhCPK32 and GhCPK72 |
| CTGATTATTAGGGTTAGGTTGC    | TGAAGAATCTCAAGGACACG   | Gh_A11G1615 and Gh_D11G1774 | GhCPK33 and GhCPK74 |
| TCACGGGTAGAACTTACTCTTA    | TTGCAGTTCGTAGAAGTCGG   | Gh_A11G1615 and Gh_D11G1774 | GhCPK33 and GhCPK74 |
| GGCTGTAATCTCTGAAGTGGA     | TTTCACGTCTTCTTTGCAA    | Gh_A11G2941 and Gh_D11G3329 | GhCPK34 and GhCPK75 |
| CTTTTTCAGTTTGTGTGTTCC     |                        |                             |                     |
| ATTTTGTTCACCTTCCAAGTTAC   |                        |                             |                     |
| GAGCAGCAGTCAGTCTAGCC      |                        |                             |                     |
| CAGCGACGACCAACTCTCT       |                        |                             |                     |
| CATGAAACATAAGATCAAAAACCT  |                        |                             |                     |
| CACAAGCGAACTAATAGATTCA    |                        |                             |                     |
| CGCCTATCCCCAACTTCT        |                        |                             |                     |
| TGTGCTGGTGGAGAACTTTT      |                        |                             |                     |
| TCCTCCTGCTGATTCACAAA      |                        |                             |                     |
| TTCCGACAGTGCCAAAGAT       |                        |                             |                     |
| CAGATGATCTGCAGTTTATTTCTT  |                        |                             |                     |
| GCTTCTTTGTATTCGTCCTGAT    |                        |                             |                     |
| CTCCACAACAATCAAAACCAC     |                        |                             |                     |
| AGGTTCCATTGACCCTTTG       |                        |                             |                     |
| ATCAGATGAACAAGGTACATTCC   |                        |                             |                     |
| ATGGGGAATTGTTGTAGATCTC    |                        |                             |                     |
| TAAGTAACTCCGAACTCACCTC    |                        |                             |                     |

|                                                                                                                                                                                                                                                                                                                                                                                   |                                                                                                                                                                                             |                                                                                                                                                                                                                                                      |                                                                                                                                                                                      |
|-----------------------------------------------------------------------------------------------------------------------------------------------------------------------------------------------------------------------------------------------------------------------------------------------------------------------------------------------------------------------------------|---------------------------------------------------------------------------------------------------------------------------------------------------------------------------------------------|------------------------------------------------------------------------------------------------------------------------------------------------------------------------------------------------------------------------------------------------------|--------------------------------------------------------------------------------------------------------------------------------------------------------------------------------------|
| CGTGCAAGTCAATCTCCAA<br>TTCACAAAGCTCCATAACCA<br>TGTTGTTTAAAAATGTATCCCA<br>TAGTTTGTTTCATTGCCGAGA<br>AGGTAAAGACAGATACTTTTCGC<br>CAAATATCAGCTTCATGTCCAT<br>TAGGGAAACTGGGAATGAAG<br>AAAGGAAAGTTGTCCCGAAT<br>TTTGATCTTCACATTTTTTTCTC<br>ACCGTTTCTTGGGGTCTC<br>GCCCTAATATCCGATAGC<br>ATGATTCAAAAAGAAATGGAGA<br>GCCTGATCCTTTTGTGTTTTC<br>TCCCGTATCTCTGTATCCTTCA<br>AAGAAATAAGGGGATTGAAAGA | ACATTATAGCAACCTCGCGT<br>TCCATGGATTTCCCAAACG<br>ATGTAGCTCCAGAAGTATTG<br>CTAAGCCTCCTCATGTGAAG<br>ATATTCGACCAAGTCTTGCA<br>GAGCTGTCAACCGTTCTGAA<br>TGGCTTGCGAGAAATGTTTA<br>ACACTTGAAGAACTCAGGCA | Gh_A11G3011 and Gh_D11G0314<br>Gh_A12G0109 and Gh_D12G0121<br>Gh_A12G2686 and Gh_D12G2743<br>Gh_A13G0017 and Gh_D13G0033<br>Gh_A13G0017 and Gh_D13G0033<br>Gh_A13G0563 and Gh_D13G0560<br>Gh_A13G0566 and Gh_D13G0561<br>Gh_A13G1891 and Gh_D13G2278 | GhCPK35 and GhCPK73<br>GhCPK36 and GhCPK76<br>GhCPK37 and GhCPK77<br>GhCPK38 and GhCPK78<br>GhCPK38 and GhCPK78<br>GhCPK39 and GhCPK79<br>GhCPK40 and GhCPK80<br>GhCPK42 and GhCPK82 |
|-----------------------------------------------------------------------------------------------------------------------------------------------------------------------------------------------------------------------------------------------------------------------------------------------------------------------------------------------------------------------------------|---------------------------------------------------------------------------------------------------------------------------------------------------------------------------------------------|------------------------------------------------------------------------------------------------------------------------------------------------------------------------------------------------------------------------------------------------------|--------------------------------------------------------------------------------------------------------------------------------------------------------------------------------------|

---

**Table S7 The other primers used in this study**

| Primer        | Sequence                                             | Note                     |
|---------------|------------------------------------------------------|--------------------------|
| GhCPK33-OE-S  | ATGGGAGCCTGTCTCTCC                                   | Overexpression           |
| GhCPK33-OE-A  | CTATAACTTCCGAGAATTCCG                                | Overexpression           |
| GhCPK74-OE-S  | ATGGGAGCCTGTCTCTCC                                   | Overexpression           |
| GhCPK74-OE-A  | CTATAACTTCCGAGAATTCCG                                | Overexpression           |
| GhCPK33-QRT-S | CACCGCAAACATCAACCCT                                  | qRT-PCR                  |
| GhCPK33-QRT-A | GTAGAACTTGGCTTCCCTTTGA                               | qRT-PCR                  |
| GhCPK74-QRT-S | CACCGCAAACATCAACCCT                                  | qRT-PCR                  |
| GhCPK74-QRT-A | CGAACTTGGCTTCCCTTTGA                                 | qRT-PCR                  |
| GhCPK33-104-S | CAGGTACCCGGGGATCC ATGGGAGCCTGTCTCTCC                 | BiFC                     |
| GhCPK33-104-A | CTGCCACCGCCGTCGAC CTATAACTTCCGAGAATTCCG              | BiFC                     |
| GhCPK74-104-S | CAGGTACCCGGGGATCC ATGGGAGCCTGTCTCTCC                 | BiFC                     |
| GhCPK74-104-A | CTGCCACCGCCGTCGAC CTATAACTTCCGAGAATTCCG              | BiFC                     |
| GhCPK33-BD-S  | ATGGAGGCCGAATTC ATGGGAGCCTGTCTCTCC                   | Y2H                      |
| GhCPK33-BD-A  | GCAGGTTCGACGGATCC CTATAACTTCCGAGAATTCCG              | Y2H                      |
| GhCPK74-BD-S  | ATGGAGGCCGAATTC ATGGGAGCCTGTCTCTCC                   | Y2H                      |
| GhCPK74-BD-A  | GCAGGTTCGACGGATCC CTATAACTTCCGAGAATTCCG              | Y2H                      |
| GhCPK33-771-S | CTCGGTACCCGGGGATCC ATGGGAGCCTGTCTCTCC                | LCI                      |
| GhCPK33-771-A | TACGAGATCTGGTTCGAC CTATAACTTCCGAGAATTCCG             | LCI                      |
| GhCPK74-771-S | CTCGGTACCCGGGGATCC ATGGGAGCCTGTCTCTCC                | LCI                      |
| GhCPK74-771-A | TACGAGATCTGGTTCGAC CTATAACTTCCGAGAATTCCG             | LCI                      |
| GhCPK33-BP-S  | GGGGACAAGTTTGTACAAAAAAGCAGGCTCA ATGGGAGCCTGTCTCTCC   | Subcellular Localization |
| GhCPK33-BP-A  | GGGGACCACTTTGTACAAGAAAGCTGGGTA CTATAACTTCCGAGAATTCCG | Subcellular Localization |
| GhCPK74-BP-S  | GGGGACAAGTTTGTACAAAAAAGCAGGCTCA ATGGGAGCCTGTCTCTCC   | Subcellular Localization |
| GhCPK74-BP-A  | GGGGACCACTTTGTACAAGAAAGCTGGGTA CTATAACTTCCGAGAATTCCG | Subcellular Localization |
| GhSAMS1-AD-S  | CAGATTACGCTCATATG ATGGAGACCTTTCTATTACATC             | Y2H                      |
| GhSAMS1-AD-A  | TGCTTGGGTGGAATTC TTAAGATTGGGGCTTGTC                  | Y2H                      |
| GhSAMS2-AD-S  | CAGATTACGCTCATATG ATGGAGACCTTTCTATTACATCT            | Y2H                      |

|                |                                                  |         |
|----------------|--------------------------------------------------|---------|
| GhSAMS2-AD-A   | TGCTTGGGTGGAATTC TTAAGACTGAGGCTTCTCCCA           | Y2H     |
| GhSAMS1-106-S  | AGGACGCCGGCGGATCC ATGGAGACCTTTCTATTACATC         | BiFC    |
| GhSAMS1-106-A  | AAGCTCTGCAGGTCGAC TTAAGATTGGGGCTTGTCC            | BiFC    |
| GhSAMS2-106-S  | AGGACGCCGGCGGATCC ATGGAGACCTTTCTATTACATCT        | BiFC    |
| GhSAMS2-106-A  | AAGCTCTGCAGGTCGAC TTAAGACTGAGGCTTCTCCCA          | BiFC    |
| GhSAMS1-772-S  | GGCGGTACCCGGGATCCA ATGGAGACCTTTCTATTACATC        | LCI     |
| GhSAMS1-772-A  | AAGCTCTGCAGGTCGAC TTAAGATTGGGGCTTGTCC            | LCI     |
| GhSAMS2-772-S  | GGCGGTACCCGGGATCCA ATGGAGACCTTTCTATTACATCT       | LCI     |
| GhSAMS2-772-A  | AAGCTCTGCAGGTCGAC TTAAGACTGAGGCTTCTCCCA          | LCI     |
| GhSAMS1-QRT-S  | CATCAAGCCTGTCATCCCT                              | qRT-PCR |
| GhSAMS1-QRT-A  | CCAGCCACCATAAGTGTCAA                             | qRT-PCR |
| GhSAMS2-QRT-S  | AAACATGCACCAAGACCAAC                             | qRT-PCR |
| GhSAMS2-QRT-A  | TCAAGACCCACATCATCAGAA                            | qRT-PCR |
| GhSAMS1-VIGS-S | CAAAATGGCATGCCTGCAGACTAGT TATGCCACTGATGAAACCC    | VIGS    |
| GhSAMS1-VIGS-A | GAATTCACTAGACCTAGGGGCGCGCC TTGATGACATGCTCCTTGAGG | VIGS    |
| GhSAMS2-VIGS-S | CAAAATGGCATGCCTGCAGACTAGT GCCGCTCTATCGGATTTGT    | VIGS    |
| GhSAMS2-VIGS-A | GAATTCACTAGACCTAGGGGCGCGCC GTGCCATTCTTCCTAACCTCA | VIGS    |
